# Supplementary material for: Trajectory formation principles are the same after mild or moderate stroke
Source: PLoS One. 2017 Mar 22;12(3):e0173674. doi: 10.1371/journal.pone.0173674 (PMC5362058; doi:10.1371/journal.pone.0173674)
Supplement: S1 DataSet — (CSV) [file pone.0173674.s001.csv]

	S	IO	ORI	ID	G	MT.sec	nSM.nb	TimeInIA.percent	DistInIA.percent	ErrDistAtEndSM1.percent	ErrAnglAtEndSM1.deg	VarAtPkAcc.percent	VarAtPkVel.percent	VarAtPkDec.percent	VarAtEndMT.percent	RT.sec	PV.cm.sec	dSM1.percent	tHI.percent	Pause.nb
1	YC_001	OutWard	W	3.80	YoungCon	0.675	1.5	0.33929	0.54239	0.04826	2.09205	0.025769	0.05515	0.024646	0.010989	0.09	77.0639097744361	0.90678	0.92857	0
2	YC_001	Inward	W	3.80	YoungCon	0.63	2	0.31136	0.63316	0.1312	1.70898	0.037365	0.10819	0.11683	0.0052729	0.045	87.9023959899749	0.78622	0.57273	0
3	YC_001	OutWard	NW	3.80	YoungCon	0.63	2	0.33409	0.53266	0.05299	1.98259	0.027536	0.089656	0.045827	0.0010719	0.18	79.6744035087719	0.85812	0.61898	0.5
4	YC_001	Inward	NW	3.80	YoungCon	0.555	1.5	0.35234	0.46953	0.03442	1.16435	0.0099498	0.03443	0.044534	0.0076258	0.15	76.3469298245614	0.87447	0.81579	0.5
5	YC_001	OutWard	N	3.80	YoungCon	0.705	2	0.28045	0.4878	0.09282	0.186896	0.015421	0.029129	0.042624	0.0040767	0.135	68.713045112782	0.91806	0.57358	0
6	YC_001	Inward	N	3.80	YoungCon	0.585	2	0.33289	0.54913	0.02255	0.777403	0.015462	0.066615	0.024815	0.0069308	0.135	76.099007518797	0.89138	0.66579	0
7	YC_001	OutWard	NE	3.80	YoungCon	0.78	2	0.26599	0.43461	0.15336	3.53857	0.022491	0.043305	0.060247	0.0058921	0.15	52.1425639097744	0.78114	0.59545	-0.5
8	YC_001	Inward	NE	3.80	YoungCon	0.63	2	0.36111	0.54612	0.07914	2.65879	0.024431	0.01724	0.057849	0.014341	0.105	70.4632957393484	0.9055	0.67361	0
9	YC_001	OutWard	E	3.80	YoungCon	0.885	2.5	0.2379	0.43975	0.08748	3.86974	0.036581	0.080668	0.12332	0.0025423	0.15	73.2344260651629	0.80101	0.45658	0
10	YC_001	Inward	E	3.80	YoungCon	0.69	2.5	0.28333	0.54311	0.14305	6.11957	0.023713	0.058964	0.020342	0.007469	0.15	76.5734185463659	0.84507	0.55	1
11	YC_001	OutWard	W	5.43	YoungCon	1.02	2.5	0.20606	0.51485	0.04976	1.26117	0.029975	0.031443	0.040599	0.0023997	0.165	80.6810100250627	0.93174	0.44	1
12	YC_001	Inward	W	5.43	YoungCon	1.02	3.5	0.17576	0.46607	0.05186	2.02573	0.033453	0.054129	0.019953	0.0023965	0.15	92.9439047619048	0.88621	0.36714	0.5
13	YC_001	OutWard	NW	5.43	YoungCon	0.855	2.5	0.22401	0.46431	0.0486	0.427004	0.010547	0.026221	0.11103	0.003006	0.165	72.3244411027569	0.90885	0.59074	0
14	YC_001	Inward	NW	5.43	YoungCon	0.57	1.5	0.39583	0.53594	0.0494	0.771277	0.02351	0.053646	0.074987	0.0093108	0.15	77.6375288220551	0.9252	0.79167	0
15	YC_001	OutWard	N	5.43	YoungCon	0.795	2	0.265	0.45988	0.0713200000000001	2.3104	0.014955	0.030518	0.077702	0.0057441	0.135	70.3151127819549	0.88168	0.64609	0
16	YC_001	Inward	N	5.43	YoungCon	0.855	3	0.25	0.53222	0.0302	1.05876	0.022068	0.032411	0.021339	0.00056072	0.135	75.725037593985	0.92198	0.48214	1
17	YC_001	OutWard	NE	5.43	YoungCon	0.825	1.5	0.25531	0.44133	0.03726	1.15428	0.022726	0.069322	0.11655	0.0020778	0.15	61.2099348370927	0.85822	0.78846	0.5
18	YC_001	Inward	NE	5.43	YoungCon	0.87	3	0.23667	0.50191	0.0516	1.85303	0.030097	0.070849	0.03105	0.0053013	0.15	75.9286616541353	0.8661	0.46548	1.5
19	YC_001	OutWard	E	5.43	YoungCon	0.96	3	0.16718	0.36063	0.17071	3.03653	0.016147	0.022722	0.052712	0.0083571	0.12	62.1536215538847	0.68897	0.39314	0.5
20	YC_001	Inward	E	5.43	YoungCon	0.96	2.5	0.21875	0.49167	0.06475	1.738	0.021196	0.036748	0.089253	0.00086004	0.165	83.4748621553885	0.89972	0.5625	0.5
21	SP_001	OutWard	W	3.80	Patient	1.305	2	0.43155	0.44753	0.21272	3.70319	0.035216	0.087799	0.16955	0.0047838	0.27	29.3643959899749	0.76373	0.66964	0.5
22	SP_001	Inward	W	3.80	Patient	1.59	2	0.34848	0.32539	0.12002	5.47449	0.034754	0.05795	0.062939	0.0045775	0.135	31.9902857142857	0.55012	0.75787	0.5
23	SP_001	OutWard	NW	3.80	Patient	1.575	2	0.31071	0.47539	0.07495	1.9434	0.045157	0.12613	0.16121	0.035867	0.18	28.2509874686717	0.81163	0.70249	0
24	SP_001	Inward	NW	3.80	Patient	1.2	2	0.34358	0.31067	0.3477	9.54454	0.048663	0.09349	0.23055	0.017611	0.285	28.9181453634085	0.52731	0.56016	0.5
25	SP_001	OutWard	N	3.80	Patient	1.17	2.5	0.37898	0.35232	0.2184	3.39441	0.057184	0.096574	0.075365	0.011966	0.21	30.1955614035088	0.60234	0.69318	0
26	SP_001	Inward	N	3.80	Patient	1.2	2	0.37333	0.35291	0.26608	1.64667	0.041036	0.065452	0.1734	0.019432	0.285	29.9191654135338	0.63101	0.58411	0
27	SP_001	OutWard	NE	3.80	Patient	1.485	3.5	0.37463	0.43989	0.23966	2.81933	0.029328	0.083598	0.19139	0.013029	0.21	32.7638746867168	0.74651	0.51164	0
28	SP_001	Inward	NE	3.80	Patient	1.395	3.5	0.23167	0.34938	0.38764	6.40393	0.029661	0.012509	0.038599	0.021855	0.3	33.7956165413534	0.62296	0.35771	0
29	SP_001	OutWard	E	3.80	Patient	1.755	2.5	0.27085	0.30015	0.43599	11.3341	0.041222	0.076536	0.21751	0.017556	0.285	26.1400726817043	0.50596	0.42498	0.5
30	SP_001	Inward	E	3.80	Patient	1.395	3.5	0.35703	0.53609	0.19645	5.27937	0.094021	0.090738	0.092949	0.015691	0.27	34.9563909774436	0.78667	0.45331	0.5
31	SP_001	OutWard	W	5.43	Patient	2.145	5.5	0.24911	0.44607	0.12728	2.88508	0.034835	0.09066	0.10364	0.011573	0.27	35.840701754386	0.75044	0.4256	0
32	SP_001	Inward	W	5.43	Patient	1.935	5.5	0.12384	0.24232	0.33476	14.3318	0.0472	0.15603	0.3516	0.0055371	0.39	33.4505288220551	0.44736	0.30536	1.5
33	SP_001	OutWard	NW	5.43	Patient	2.01	4	0.24709	0.38227	0.18529	1.70368	0.051025	0.080682	0.090881	0.016416	0.21	27.3054461152882	0.72027	0.47569	0
34	SP_001	Inward	NW	5.43	Patient	1.56	3	0.24781	0.34845	0.36145	6.83682	0.016127	0.085678	0.10335	0.0024004	0.285	25.8407142857143	0.63177	0.42012	1
35	SP_001	OutWard	N	5.43	Patient	1.935	4.5	0.25275	0.31089	0.28386	2.48998	0.073049	0.12793	0.073349	0.0042081	0.225	26.8385338345865	0.59647	0.40682	1.5
36	SP_001	Inward	N	5.43	Patient	1.5	3	0.30128	0.37528	0.09572	1.06683	0.027918	0.07821	0.1104	0.0051965	0.285	30.1982581453634	0.72461	0.6287	2
37	SP_001	OutWard	NE	5.43	Patient	1.965	4	0.26667	0.48435	0.10116	2.41758	0.0091399	0.12942	0.13933	0.012258	0.315	35.2325388471178	0.82455	0.46333	1
38	SP_001	Inward	NE	5.43	Patient	1.44	3.5	0.26628	0.35022	0.43648	2.98627	0.26631	0.23812	0.2099	0.006213	0.3	29.3731704260652	0.67356	0.35767	1
39	SP_001	OutWard	E	5.43	Patient	1.98	5.5	0.1954	0.28584	0.39787	0.705116	0.22898	0.21734	0.21379	0.0028554	0.33	25.3515062656642	0.54824	0.31433	1
40	SP_001	Inward	E	5.43	Patient	1.53	3	0.37822	0.52498	0.08213	3.30086	0.063722	0.1106	0.12443	0.009904	0.27	38.7619348370927	0.81459	0.61429	0.5
41	AC_001	OutWard	W	3.80	AgedCon	1.26	3	0.21429	0.34931	0.25958	1.95623	0.01585	0.055803	0.11515	0.010768	0.285	36.3920651629073	0.62836	0.41667	1
42	AC_001	Inward	W	3.80	AgedCon	1.155	2	0.27525	0.39467	0.0498499999999999	1.00747	0.016307	0.02706	0.1719	0.0062038	0.27	41.1005914786967	0.71765	0.74255	1
43	AC_001	OutWard	NW	3.80	AgedCon	1.095	2	0.27365	0.43225	0.07756	0.732001	0.013651	0.04114	0.13806	0.0059805	0.27	36.9322781954887	0.76695	0.6708	0.5
44	AC_001	Inward	NW	3.80	AgedCon	0.855	1	0.33974	0.42179	0.04702	1.52212	0.01196	0.052292	0.051121	0.0058771	0.255	44.1268746867168	0.78247	1	0.5
45	AC_001	OutWard	N	3.80	AgedCon	1.095	1.5	0.34248	0.44751	0.03308	1.43719	0.025618	0.023579	0.073919	0.0081258	0.27	34.6286616541353	0.83535	0.92857	1
46	AC_001	Inward	N	3.80	AgedCon	0.975	2	0.3381	0.43858	0.06386	2.38559	0.016293	0.041145	0.10169	0.0045732	0.27	38.698007518797	0.80024	0.77143	1
47	AC_001	OutWard	NE	3.80	AgedCon	1.155	2	0.26012	0.34985	0.34923	2.87098	0.025071	0.13339	0.086627	0.015764	0.315	28.3228696741855	0.62632	0.46314	0.5
48	AC_001	Inward	NE	3.80	AgedCon	1.02	2.5	0.26562	0.42974	0.0870300000000001	2.42475	0.0068879	0.057885	0.092415	0.018564	0.33	38.8941127819549	0.7643	0.65179	0.5
49	AC_001	OutWard	E	3.80	AgedCon	1.05	1.5	0.34549	0.37986	0.07369	1.0657	0.013786	0.090941	0.078523	0.015651	0.405	29.0508997493734	0.69201	0.90244	0
50	AC_001	Inward	E	3.80	AgedCon	1.215	2.5	0.26331	0.38865	0.10791	3.84546	0.014352	0.075638	0.16633	0.00229	0.27	41.7887844611529	0.68796	0.58749	1
51	AC_001	OutWard	W	5.43	AgedCon	1.485	2.5	0.27194	0.32485	0.09149	0.930187	0.0040056	0.028219	0.16506	0.003495	0.285	32.8308370927318	0.6264	0.61567	1
52	AC_001	Inward	W	5.43	AgedCon	1.29	2.5	0.24756	0.37805	0.06041	0.715422	0.005095	0.039687	0.13717	0.0052034	0.255	38.0374586466165	0.71583	0.68452	1
53	AC_001	OutWard	NW	5.43	AgedCon	1.215	2	0.29099	0.3838	0.03601	1.19996	0.012951	0.036722	0.033766	0.0055183	0.27	35.2396591478697	0.74769	0.81304	0.5
54	AC_001	Inward	NW	5.43	AgedCon	1.11	3	0.26994	0.42129	0.10339	1.67665	0.018166	0.05313	0.080082	0.0042115	0.27	43.7110350877193	0.81977	0.52273	1
55	AC_001	OutWard	N	5.43	AgedCon	1.29	3	0.26124	0.38439	0.05835	0.554874	0.0065183	0.018767	0.065247	0.0019011	0.27	36.150954887218	0.74088	0.70439	1
56	AC_001	Inward	N	5.43	AgedCon	1.215	3	0.28427	0.41207	0.08494	0.84606	0.017167	0.042981	0.083994	0.0054778	0.315	39.4391904761905	0.79899	0.52375	1
57	AC_001	OutWard	NE	5.43	AgedCon	1.455	2.5	0.33333	0.38999	0.02496	1.24849	0.01073	0.053796	0.094255	0.0043568	0.315	30.4351478696742	0.73377	0.77222	0.5
58	AC_001	Inward	NE	5.43	AgedCon	1.08	2	0.34722	0.42537	0.03334	1.63969	0.022883	0.066903	0.054633	0.0051963	0.345	38.3278270676692	0.82681	0.77778	0.5
59	AC_001	OutWard	E	5.43	AgedCon	1.365	2	0.23128	0.31863	0.04233	0.732952	0.02277	0.010051	0.2147	0.009806	0.255	34.1954561403509	0.61654	0.76047	0.5
60	AC_001	Inward	E	5.43	AgedCon	1.455	3	0.23953	0.44895	0.05442	1.36427	0.014526	0.02971	0.045697	0.0048134	0.255	46.2651378446115	0.88379	0.57054	1.5
61	YC_002	OutWard	W	3.80	YoungCon	0.84	2	0.26377	0.42102	0.11591	2.85273	0.0064157	0.077898	0.098784	0.0031243	0.18	55.403626566416	0.72625	0.66667	0
62	YC_002	Inward	W	3.80	YoungCon	0.705	2	0.36667	0.51533	0.09434	3.76575	0.020453	0.028663	0.067642	0.028806	0.18	60.174380952381	0.87017	0.7213	0
63	YC_002	OutWard	NW	3.80	YoungCon	0.735	1.5	0.30735	0.40838	0.04253	1.56498	0.036508	0.096462	0.072363	0.023404	0.18	50.427298245614	0.75645	0.86207	0
64	YC_002	Inward	NW	3.80	YoungCon	0.66	2	0.35729	0.49699	0.07591	1.34647	0.013281	0.045406	0.067604	0.028393	0.165	60.8089799498747	0.92929	0.68211	0
65	YC_002	OutWard	N	3.80	YoungCon	0.87	1	0.3337	0.50489	0.02212	0.575216	0.010233	0.028989	0.08504	0.010775	0.21	53.4684436090226	0.87541	1	1
66	YC_002	Inward	N	3.80	YoungCon	0.615	1	0.42017	0.45887	0.0356300000000001	1.23185	0.017005	0.030187	0.021082	0.018018	0.18	58.5532857142857	0.84277	1	0.5
67	YC_002	OutWard	NE	3.80	YoungCon	0.945	2	0.2697	0.40162	0.10019	1.5918	0.027033	0.060084	0.098921	0.0067194	0.21	42.8966541353383	0.7311	0.66364	0
68	YC_002	Inward	NE	3.80	YoungCon	0.69	1.5	0.43529	0.55641	0.034	1.94179	0.0049468	0.049263	0.099634	0.009365	0.195	49.1695939849624	0.90801	0.86111	1
69	YC_002	OutWard	E	3.80	YoungCon	0.975	1.5	0.23106	0.37753	0.11344	0.547017	0.025748	0.075731	0.16045	0.0056669	0.21	47.9467418546366	0.69378	0.72727	0.5
70	YC_002	Inward	E	3.80	YoungCon	0.78	2	0.32667	0.53386	0.08361	1.37408	0.017614	0.062378	0.048134	0.012564	0.18	65.6599824561403	0.93377	0.65333	0
71	YC_002	OutWard	W	5.43	YoungCon	0.885	2	0.28121	0.45492	0.0863	1.79836	0.011363	0.067644	0.11373	0.0079052	0.18	58.521350877193	0.87881	0.62701	0.5
72	YC_002	Inward	W	5.43	YoungCon	0.93	3.5	0.25833	0.44179	0.07599	1.84763	0.021266	0.14194	0.12391	0.01144	0.165	58.845290726817	0.71838	0.51068	0
73	YC_002	OutWard	NW	5.43	YoungCon	1.17	2.5	0.21792	0.43259	0.0554	1.33715	0.018044	0.046135	0.022032	0.0033269	0.18	56.1445864661654	0.83001	0.56201	1.5
74	YC_002	Inward	NW	5.43	YoungCon	0.81	1.5	0.30667	0.47516	0.02499	0.64025	0.016919	0.059458	0.048658	0.0034585	0.195	53.5346090225564	0.90929	0.84	1
75	YC_002	OutWard	N	5.43	YoungCon	0.975	2	0.28992	0.4324	0.02684	0.780383	0.022833	0.090451	0.12515	0.0021789	0.21	48.7211328320802	0.82342	0.71371	1
76	YC_002	Inward	N	5.43	YoungCon	0.885	1.5	0.30121	0.49864	0.01998	0.841487	0.013829	0.062176	0.061441	0.0038388	0.21	58.6212807017544	0.88293	0.74242	1
77	YC_002	OutWard	NE	5.43	YoungCon	0.945	1.5	0.25357	0.38116	0.03881	0.49193	0.012483	0.030332	0.077466	0.0043463	0.21	45.9345513784461	0.73584	0.85714	0.5
78	YC_002	Inward	NE	5.43	YoungCon	0.87	1.5	0.31183	0.4316	0.0268699999999999	1.08206	0.018318	0.053609	0.076899	0.0059801	0.195	50.7827293233083	0.82757	0.85185	1
79	YC_002	OutWard	E	5.43	YoungCon	1.185	2	0.20654	0.37073	0.21943	3.46519	0.013592	0.043827	0.10707	0.00044843	0.21	51.1365463659148	0.71527	0.40948	0.5
80	YC_002	Inward	E	5.43	YoungCon	0.99	2	0.2692	0.37916	0.03892	0.518302	0.016313	0.040232	0.055928	0.016308	0.195	55.6978070175439	0.74216	0.72702	0
81	SP_002	OutWard	W	3.80	Patient	4.665	9.5	0.094403	0.14596	0.76942	17.6141	0.27741	0.33957	0.35646	0.026785	0.255	10.0133837092732	0.21682	0.15004	3
82	SP_002	Inward	W	3.80	Patient	2.295	3	0.13812	0.1827	0.53125	2.22555	0.39399	0.41114	0.40984	0.017588	0.33	13.5548696741855	0.31415	0.28627	0.5
83	SP_002	OutWard	NW	3.80	Patient	3.315	7.5	0.12504	0.20357	0.67651	17.4336	0.30259	0.25292	0.37402	0.013891	0.3	11.7311050125313	0.3266	0.2342	1
84	SP_002	Inward	NW	3.80	Patient	3.57	5.5	0.18035	0.26335	0.42702	8.46338	0.4595	0.43128	0.32335	0.0075259	0.195	19.0779240601504	0.42792	0.30478	0.5
85	SP_002	OutWard	N	3.80	Patient	6.45	11.5	0.037291	0.19923	0.69245	12.367	0.42617	0.3601	0.2964	0.0088669	1.14	30.0821253132832	0.25173	0.074581	3.5
86	SP_002	Inward	N	3.80	Patient	3.705	7.5	0.14408	0.20659	0.60146	26.8102	0.059206	0.090692	0.31235	0.022388	0.135	19.0044711779449	0.29541	0.20662	1
87	SP_002	OutWard	NE	3.80	Patient	4.89	8.5	0.11317	0.17604	0.70109	27.378	0.44703	0.24557	0.19311	0.024521	0.345	10.1713729323308	0.22917	0.16895	1
88	SP_002	Inward	NE	3.80	Patient	4.23	9.5	0.092338	0.24194	0.58891	17.7689	0.42712	0.15406	0.37089	0.0053668	0.45	17.4376701754386	0.27852	0.1522	1
89	SP_002	OutWard	E	3.80	Patient	3.315	6	0.14835	0.23151	0.60104	11.6587	0.34607	0.30839	0.054799	0.036291	0.33	15.6870270676692	0.36382	0.22967	1
90	SP_002	Inward	E	3.80	Patient	3.015	4.5	0.12487	0.17689	0.65202	27.8822	0.19291	0.35782	0.50862	0.017229	0.255	15.9193192982456	0.27173	0.22866	0.5
91	SP_002	OutWard	W	5.43	Patient	7.11	14.5	0.042468	0.27634	0.67229	16.7138	0.45988	0.073095	0.49723	0.0057063	0.405	13.703779197995	0.29759	0.076229	4.5
92	SP_002	Inward	W	5.43	Patient	6.915	12.5	0.11478	0.12527	0.74693	10.1158	0.43485	0.40757	0.23783	0.010339	0.105	11.6787318295739	0.22835	0.17833	5
93	SP_002	OutWard	NW	5.43	Patient	6.57	14.5	0.060849	0.18612	0.71213	10.974	0.42562	0.28672	0.19508	0.016922	0.42	11.1650919799499	0.32893	0.088097	6.5
94	SP_002	Inward	NW	5.43	Patient	5.295	10.5	0.10999	0.28537	0.34115	12.3169	0.062473	0.11316	0.20422	0.0080675	0.27	24.2202125313283	0.54661	0.20769	4
95	SP_002	OutWard	N	5.43	Patient	15.465	32	0.054291	0.085211	0.88081	42.1748	0.46041	0.34207	0.25842	0.0025794	0.315	5.6241686716792	0.14217	0.066563	4
96	SP_002	Inward	N	5.43	Patient	5.01	10	0.10952	0.17608	0.6797	16.0051	0.14942	0.29	0.45411	0.011334	0.255	12.2003651629073	0.27395	0.17551	3
97	SP_002	OutWard	NE	5.43	Patient	5.325	11	0.055974	0.089372	0.81665	46.1955	0.41285	0.10354	0.17481	0.010449	0.42	12.0576551378446	0.12038	0.080668	2.5
98	SP_002	Inward	NE	5.43	Patient	5.22	10.5	0.098648	0.20359	0.69571	18.7187	0.38761	0.23663	0.28851	0.0032383	0.225	9.36663533834587	0.34831	0.14676	1.5
99	SP_002	OutWard	E	5.43	Patient	6.18	12	0.06618	0.15845	0.67881	16.9812	0.49515	0.34823	0.081863	0.016098	0.345	11.1385343358396	0.27827	0.12573	5.5
100	SP_002	Inward	E	5.43	Patient	5.085	11	0.062426	0.098138	0.79355	19.0558	0.38575	0.36979	0.12059	0.0086904	0.3	7.45911604010025	0.16851	0.12098	1
101	AC_002	OutWard	W	3.80	AgedCon	0.99	1.5	0.27189	0.30293	0.0480699999999999	0.79155	0.015817	0.032855	0.1791	0.022208	0.225	39.8134360902256	0.55329	0.9	0
102	AC_002	Inward	W	3.80	AgedCon	1.065	1.5	0.33596	0.55277	0.06247	1.85515	0.020699	0.067512	0.072765	0.0033666	0.18	40.5661804511278	0.90027	0.83721	1
103	AC_002	OutWard	NW	3.80	AgedCon	1.2745	2	0.29048	0.49202	0.09057	2.41613	0.014855	0.075748	0.086887	0.0023594	0.195	42.598350877193	0.82571	0.6873	0.5
104	AC_002	Inward	NW	3.80	AgedCon	0.99	1	0.36108	0.43952	0.03631	0.897953	0.034506	0.037222	0.16964	0.0090996	0.195	37.4835588972431	0.83905	1	0.5
105	AC_002	OutWard	N	3.80	AgedCon	0.945	1	0.41278	0.4272	0.01762	0.307021	0.026438	0.066122	0.082271	0.0062991	0.15	37.947619047619	0.8062	1	1
106	AC_002	Inward	N	3.80	AgedCon	1.05	1	0.44242	0.44215	0.0256999999999999	1.33986	0.031947	0.059166	0.074768	0.0082826	0.15	32.030694235589	0.81023	1	1
107	AC_002	OutWard	NE	3.80	AgedCon	1.155	1	0.43093	0.48264	0.03142	1.18358	0.023444	0.028473	0.15242	0.0076388	0.15	30.8801353383459	0.76744	1	1
108	AC_002	Inward	NE	3.80	AgedCon	1.08	1	0.4305	0.47284	0.04588	2.1498	0.019124	0.10861	0.054551	0.0031268	0.195	29.8628822055138	0.68392	1	0
109	AC_002	OutWard	E	3.80	AgedCon	1.65	3	0.24258	0.29903	0.41705	2.15924	0.01923	0.066805	0.11236	0.0033419	0.12	30.4300601503759	0.50516	0.4162	0.5
110	AC_002	Inward	E	3.80	AgedCon	1.05	1.5	0.29486	0.36622	0.04822	1.02674	0.022797	0.036057	0.10039	0.010977	0.21	43.7039147869674	0.62324	0.91463	0
111	AC_002	OutWard	W	5.43	AgedCon	1.305	2	0.20722	0.28523	0.0489000000000001	0.61691	0.018733	0.067346	0.22172	0.004248	0.225	39.3295438596491	0.55527	0.67424	1
112	AC_002	Inward	W	5.43	AgedCon	1.335	2.5	0.2076	0.4354	0.0302	0.764354	0.046818	0.12126	0.10586	0.0019236	0.18	44.0321002506266	0.86388	0.58704	1
113	AC_002	OutWard	NW	5.43	AgedCon	1.215	2	0.30769	0.49355	0.06873	1.49544	0.0087021	0.090621	0.15253	0.0074225	0.195	39.720343358396	0.80292	0.66972	0
114	AC_002	Inward	NW	5.43	AgedCon	1.215	2	0.37026	0.52261	0.0369	0.901544	0.046153	0.07865	0.035801	0.0062143	0.18	35.6191604010025	0.90473	0.74908	1
115	AC_002	OutWard	N	5.43	AgedCon	1.005	1	0.42371	0.46964	0.01241	0.162938	0.016522	0.061843	0.057247	0.0086303	0.12	34.8223634085213	0.90614	1	0.5
116	AC_002	Inward	N	5.43	AgedCon	1.095	1	0.41165	0.55538	0.0154300000000001	0.710354	0.025228	0.095348	0.045473	0.0014932	0.195	32.6780676691729	0.82493	1	1
117	AC_002	OutWard	NE	5.43	AgedCon	1.83	3	0.24396	0.50178	0.05128	2.00515	0.035764	0.075626	0.084003	0.004334	0.18	32.8125413533835	0.76626	0.55275	1.5
118	AC_002	Inward	NE	5.43	AgedCon	1.32	2	0.31835	0.44123	0.04409	2.52224	0.023127	0.13661	0.2242	0.0052816	0.195	31.027015037594	0.68749	0.69097	1
119	AC_002	OutWard	E	5.43	AgedCon	1.71	3.5	0.21104	0.30021	0.26008	4.05213	0.01113	0.018336	0.0379	0.0020791	0.15	32.77828320802	0.56563	0.42511	1
120	AC_002	Inward	E	5.43	AgedCon	1.425	2	0.22638	0.40662	0.03883	1.97854	0.011567	0.064056	0.09892	0.010505	0.195	41.6563157894737	0.74046	0.69526	0.5
121	YC_003	OutWard	W	3.80	YoungCon	1.05	2	0.21711	0.32979	0.19364	1.90825	0.017268	0.075371	0.014355	0.00075327	0.195	43.3005338345865	0.59463	0.49325	0
122	YC_003	Inward	W	3.80	YoungCon	0.825	2	0.25	0.43041	0.08739	0.80567	0.013852	0.056636	0.06043	0.0084834	0.18	60.6853308270677	0.79932	0.59615	0
123	YC_003	OutWard	NW	3.80	YoungCon	0.93	2	0.26696	0.48972	0.08483	0.746573	0.024794	0.066118	0.04441	0.0068833	0.195	55.2097694235589	0.80752	0.66518	0
124	YC_003	Inward	NW	3.80	YoungCon	0.885	1.5	0.24569	0.41167	0.05202	0.639207	0.015534	0.049141	0.048805	0.022122	0.165	48.9784812030075	0.75169	0.83333	0.5
125	YC_003	OutWard	N	3.80	YoungCon	1.065	2	0.22576	0.48216	0.11734	0.477866	0.014489	0.050298	0.05679	0.0029866	0.18	55.1860776942356	0.87744	0.49324	0
126	YC_003	Inward	N	3.80	YoungCon	0.705	1	0.35338	0.50797	0.02516	0.336537	0.017012	0.035213	0.038421	0.0055218	0.165	56.6590827067669	0.93554	1	0.5
127	YC_003	OutWard	NE	3.80	YoungCon	0.825	2	0.27333	0.39461	0.15334	2.62195	0.0093124	0.06211	0.071654	0.014599	0.195	52.0100676691729	0.73045	0.58333	0
128	YC_003	Inward	NE	3.80	YoungCon	0.75	2	0.34	0.53111	0.03044	0.114509	0.022308	0.076566	0.047309	0.029701	0.18	55.0596741854637	0.88173	0.72	1
129	YC_003	OutWard	E	3.80	YoungCon	0.99	2.5	0.22234	0.36093	0.24119	3.91179	0.033199	0.1062	0.17253	0.0063859	0.18	50.7173558897243	0.64006	0.45455	0
130	YC_003	Inward	E	3.80	YoungCon	1.11	3	0.21802	0.49554	0.11551	6.2417	0.01694	0.047153	0.067879	0.0057754	0.195	63.4892807017544	0.85276	0.39717	0
131	YC_003	OutWard	W	5.43	YoungCon	1.095	2	0.20526	0.39302	0.1189	2.42105	0.0064519	0.027122	0.058599	0.0060124	0.165	53.1037844611529	0.76938	0.53797	0
132	YC_003	Inward	W	5.43	YoungCon	0.795	1.5	0.26425	0.47143	0.0214299999999999	0.530778	0.018763	0.062561	0.15364	0.0082578	0.195	67.6352857142857	0.88797	0.77778	0
133	YC_003	OutWard	NW	5.43	YoungCon	1.08	2.5	0.22291	0.45752	0.02908	0.776424	0.013739	0.044565	0.063937	0.014734	0.195	56.4742857142857	0.8662	0.59365	1
134	YC_003	Inward	NW	5.43	YoungCon	1.155	2.5	0.19478	0.39319	0.07538	0.518985	0.022717	0.029271	0.049132	0.00027582	0.165	54.5864185463659	0.76571	0.51491	0
135	YC_003	OutWard	N	5.43	YoungCon	1.005	2	0.25175	0.45997	0.07505	0.805482	0.018154	0.039677	0.018336	0.0070298	0.195	54.2472957393484	0.89452	0.55991	0.5
136	YC_003	Inward	N	5.43	YoungCon	1.02	2.5	0.2405	0.49327	0.0410700000000001	0.925605	0.0075419	0.029943	0.036575	0.0031553	0.165	59.1883759398496	0.92949	0.57692	1
137	YC_003	OutWard	NE	5.43	YoungCon	1.05	2.5	0.21417	0.38797	0.1746	4.09369	0.023109	0.052613	0.13376	0.0053513	0.195	49.8631929824561	0.74277	0.45536	1
138	YC_003	Inward	NE	5.43	YoungCon	0.735	1.5	0.38017	0.50162	0.02338	0.893666	0.022177	0.025541	0.033522	0.0081558	0.165	57.1702531328321	0.95578	0.84483	0.5
139	YC_003	OutWard	E	5.43	YoungCon	1.065	2.5	0.20606	0.37905	0.09989	1.25079	0.013692	0.04651	0.027484	0.0062378	0.21	55.1867969924812	0.7328	0.57792	0.5
140	YC_003	Inward	E	5.43	YoungCon	0.945	2.5	0.23841	0.40432	0.0938099999999999	1.89802	0.011526	0.08106	0.16704	0.0077434	0.195	55.4261328320802	0.7747	0.55393	1
141	SP_003	OutWard	W	3.80	Patient	3.375	8	0.14059	0.34803	0.46143	10.2645	0.38548	0.22658	0.083636	0.014484	0.525	16.4089228070175	0.52705	0.23063	0.5
142	SP_003	Inward	W	3.80	Patient	2.205	4.5	0.20363	0.19027	0.60754	5.42918	0.1521	0.19147	0.31028	0.017711	0.285	12.109769924812	0.32388	0.31159	0.5
143	SP_003	OutWard	NW	3.80	Patient	3.81	9	0.10598	0.17217	0.68042	5.32753	0.40337	0.28707	0.35389	0.014071	0.27	16.2524541353383	0.28005	0.14526	1
144	SP_003	Inward	NW	3.80	Patient	3.015	6	0.15066	0.16427	0.68635	8.1743	0.48759	0.3548	0.17145	0.0097067	0.33	13.1330082706767	0.26244	0.22081	0
145	SP_003	OutWard	N	3.80	Patient	3.585	9	0.1251	0.08425	0.81099	18.7702	0.44979	0.33127	0.28183	0.0084035	0.315	9.50515263157895	0.12353	0.18948	-1
146	SP_003	Inward	N	3.80	Patient	3.39	6.5	0.14254	0.21556	0.36808	2.38681	0.38492	0.3156	0.26368	0.018162	0.3	11.9291248120301	0.35185	0.32146	0
147	SP_003	OutWard	NE	3.80	Patient	3.39	8.5	0.11197	0.13894	0.76255	15.2766	0.40497	0.36423	0.33421	0.046204	0.3	11.4204571428571	0.21897	0.15821	0.5
148	SP_003	Inward	NE	3.80	Patient	3.06	7	0.14496	0.22967	0.39566	12.1475	0.025123	0.021634	0.16642	0.0054459	0.3	16.318686716792	0.32092	0.35768	0
149	SP_003	OutWard	E	3.80	Patient	2.625	5	0.15366	0.16562	0.64818	5.46101	0.46462	0.20668	0.35259	0.016858	0.33	14.6691704260652	0.26173	0.26287	0
150	SP_003	Inward	E	3.80	Patient	3.045	5.5	0.11906	0.256	0.51545	10.2722	0.44755	0.1277	0.358	0.0020705	0.3	16.32874160401	0.43486	0.18231	1
151	SP_003	OutWard	W	5.43	Patient	6.87	17	0.04455	0.10791	0.75683	5.82909	0.3437	0.27122	0.20107	0.011503	0.405	12.1062874686717	0.18929	0.077779	5
152	SP_003	Inward	W	5.43	Patient	4.365	9.5	0.07905	0.059717	0.87904	14.4986	0.47563	0.36381	0.31101	0.0078125	0.555	9.37629147869674	0.10881	0.13482	0
153	SP_003	OutWard	NW	5.43	Patient	11.595	30	0.042141	0.19883	0.68283	11.6589	0.43236	0.15341	0.30792	0.01095	0.45	18.5905403508772	0.37394	0.05334	12.5
154	SP_003	Inward	NW	5.43	Patient	5.625	14.5	0.062668	0.15807	0.76368	3.55372	0.30005	0.071265	0.29837	0.0037188	0.465	13.3353250626566	0.29241	0.090397	4.5
155	SP_003	OutWard	N	5.43	Patient	3.945	11	0.12541	0.22904	0.56712	5.35115	0.47416	0.313	0.22386	0.0021504	0.405	14.681194235589	0.3932	0.2144	1.5
156	SP_003	Inward	N	5.43	Patient	9.195	26	0.064061	0.18441	0.65472	1.59878	0.011237	0.11953	0.11105	0.0019405	0.195	11.9244979949875	0.34753	0.077266	4.5
157	SP_003	OutWard	NE	5.43	Patient	6.78	17.5	0.095586	0.20649	0.67679	15.5777	0.42333	0.27851	0.26385	0.0051528	0.525	11.846530075188	0.31672	0.13053	4.5
158	SP_003	Inward	NE	5.43	Patient	5.52	13	0.083727	0.19887	0.60958	22.6745	0.048876	0.10824	0.21269	0.0022968	0.33	15.7066213032581	0.33374	0.14025	5
159	SP_003	OutWard	E	5.43	Patient	3.81	7.5	0.10065	0.15572	0.62976	4.9604	0.3992	0.18968	0.33973	0.0082852	0.33	11.9921636591479	0.29563	0.21429	1
160	SP_003	Inward	E	5.43	Patient	5.385	14.5	0.080629	0.11728	0.71506	10.21	0.44907	0.15319	0.20538	0.0094555	0.24	11.4193844611529	0.21516	0.14048	2
161	AC_003	OutWard	W	3.80	AgedCon	1.02	2	0.29751	0.38493	0.11509	0.442009	0.01902	0.053288	0.083056	0.033392	0.24	42.1779373433584	0.68499	0.6056	0
162	AC_003	Inward	W	3.80	AgedCon	0.675	1.5	0.36437	0.48397	0.03513	1.99235	0.018765	0.020564	0.039013	0.0090736	0.24	67.0441403508772	0.89873	0.89474	1
163	AC_003	OutWard	NW	3.80	AgedCon	0.915	2.5	0.3049	0.52977	0.10086	2.21591	0.025185	0.067791	0.075477	0.012715	0.255	57.2095162907268	0.86342	0.54613	0
164	AC_003	Inward	NW	3.80	AgedCon	1.08	2.5	0.23714	0.42147	0.21276	5.45959	0.026874	0.057067	0.069281	0.010823	0.27	56.0192030075188	0.75282	0.43127	0.5
165	AC_003	OutWard	N	3.80	AgedCon	0.915	2	0.32812	0.5715	0.08466	2.14513	0.020578	0.092639	0.076342	0.0064833	0.27	59.1756140350877	0.78649	0.60938	0.5
166	AC_003	Inward	N	3.80	AgedCon	0.765	2	0.33308	0.47822	0.08636	1.65373	0.0092978	0.034154	0.042295	0.024501	0.225	62.0275338345865	0.88435	0.6486	0
167	AC_003	OutWard	NE	3.80	AgedCon	1.065	2	0.30922	0.41752	0.19522	1.9885	0.01455	0.019926	0.10957	0.0053915	0.27	38.6040401002506	0.77138	0.5779	0.5
168	AC_003	Inward	NE	3.80	AgedCon	0.78	2	0.35991	0.54026	0.06846	0.817808	0.019659	0.055695	0.069639	0.0097468	0.255	57.5913759398496	0.87578	0.71429	0
169	AC_003	OutWard	E	3.80	AgedCon	1.215	3.5	0.23893	0.34272	0.24198	2.58797	0.026005	0.078229	0.12879	0.0080245	0.375	37.4138095238095	0.62473	0.47786	0.5
170	AC_003	Inward	E	3.80	AgedCon	0.9	2	0.35	0.5235	0.04961	1.26602	0.022299	0.054476	0.032698	0.010043	0.345	52.2336115288221	0.91354	0.68333	-0.5
171	AC_003	OutWard	W	5.43	AgedCon	1.35	3.5	0.21103	0.36274	0.20309	2.40379	0.031224	0.054314	0.092444	0.0035747	0.315	43.952962406015	0.71739	0.42561	0.5
172	AC_003	Inward	W	5.43	AgedCon	1.095	3	0.2587	0.45046	0.07751	1.1877	0.010733	0.063774	0.038204	0.0072758	0.255	55.7053784461153	0.87997	0.48605	1
173	AC_003	OutWard	NW	5.43	AgedCon	1.26	3	0.23077	0.3167	0.29828	6.10226	0.010616	0.094981	0.1404	0.0062408	0.225	48.2031578947368	0.61229	0.39868	1
174	AC_003	Inward	NW	5.43	AgedCon	1.14	3	0.21185	0.43575	0.07123	2.30995	0.016941	0.086172	0.1066	0.0037111	0.315	50.7384611528822	0.81866	0.49421	0.5
175	AC_003	OutWard	N	5.43	AgedCon	1.02	2.5	0.29437	0.49107	0.0682	2.59186	0.0066687	0.033326	0.046796	0.0010864	0.3	56.3455563909774	0.91225	0.6039	1
176	AC_003	Inward	N	5.43	AgedCon	1.05	2	0.25817	0.4384	0.0394600000000001	0.989888	0.018106	0.069096	0.072426	0.0036651	0.255	54.8608922305764	0.85455	0.67157	1
177	AC_003	OutWard	NE	5.43	AgedCon	0.9	2.5	0.29911	0.48746	0.0511200000000001	0.962178	0.031593	0.062953	0.089116	0.0028657	0.33	53.9104185463659	0.85088	0.6183	1
178	AC_003	Inward	NE	5.43	AgedCon	1.155	4	0.24457	0.59065	0.08599	0.61375	0.032212	0.050951	0.03991	0.0069636	0.285	60.4331829573935	0.8238	0.44263	0
179	AC_003	OutWard	E	5.43	AgedCon	1.02	2	0.23976	0.31488	0.12358	1.08629	0.0070192	0.052405	0.041446	0.0016679	0.285	44.2426090225564	0.60949	0.70213	0
180	AC_003	Inward	E	5.43	AgedCon	0.93	2	0.30303	0.53307	0.03342	1.20363	0.028467	0.11162	0.10377	0.00888	0.24	61.9363032581454	0.82385	0.62853	0.5
181	YC_004	OutWard	W	3.80	YoungCon	0.78	2	0.26286	0.4863	0.17191	3.45419	0.027882	0.1494	0.24524	0.012847	0.18	62.1977368421053	0.79068	0.53167	-0.5
182	YC_004	Inward	W	3.80	YoungCon	1.215	3	0.13795	0.59067	0.33997	4.70515	0.017749	0.041828	0.16224	0.0036542	0.18	121.439117794486	0.82817	0.29426	0
183	YC_004	OutWard	NW	3.80	YoungCon	0.69	2	0.26087	0.40074	0.22774	2.98732	0.004619	0.070188	0.07969	0.019028	0.18	65.1481378446115	0.73873	0.5336	0
184	YC_004	Inward	NW	3.80	YoungCon	0.84	2.5	0.2246	0.44733	0.18442	1.6837	0.022084	0.046251	0.06234	0.021456	0.15	67.2758320802005	0.82063	0.44118	0.5
185	YC_004	OutWard	N	3.80	YoungCon	1.02	2.5	0.19097	0.38421	0.29166	1.94033	0.036259	0.21003	0.25379	0.0090727	0.18	57.437664160401	0.69866	0.38194	0
186	YC_004	Inward	N	3.80	YoungCon	0.735	2	0.26505	0.55996	0.09016	0.915835	0.027516	0.062904	0.087239	0.028156	0.15	90.7715438596491	0.85979	0.52013	0
187	YC_004	OutWard	NE	3.80	YoungCon	1.005	2.5	0.20971	0.47465	0.10801	2.1965	0.014044	0.082212	0.11826	0.021694	0.18	70.5725639097744	0.78819	0.48855	0
188	YC_004	Inward	NE	3.80	YoungCon	0.9	2.5	0.23459	0.41712	0.15782	2.78071	0.031334	0.068655	0.11465	0.01076	0.18	64.197664160401	0.75782	0.4827	0
189	YC_004	OutWard	E	3.80	YoungCon	1.38	4.5	0.14712	0.33751	0.35936	6.07714	0.29335	0.16568	0.26653	0.032659	0.21	51.9246817042607	0.56031	0.27444	-0.5
190	YC_004	Inward	E	3.80	YoungCon	0.66	2	0.29583	0.59425	0.10416	3.17739	0.031703	0.11069	0.19103	0.020857	0.18	81.7844235588972	0.84456	0.5875	0
191	YC_004	OutWard	W	5.43	YoungCon	0.99	2.5	0.22702	0.40628	0.09088	1.74189	0.031796	0.075761	0.099159	0.0069407	0.18	71.633045112782	0.78552	0.47098	1
192	YC_004	Inward	W	5.43	YoungCon	1.035	4	0.17692	0.59648	0.17247	3.79221	0.024629	0.11744	0.16919	0.0088134	0.18	106.966859649123	0.78347	0.34103	0.5
193	YC_004	OutWard	NW	5.43	YoungCon	0.915	3	0.19558	0.45353	0.18367	1.75249	0.03408	0.097327	0.1544	0.0061223	0.18	68.3650275689223	0.82347	0.39278	0
194	YC_004	Inward	NW	5.43	YoungCon	1.035	3	0.17395	0.38391	0.12873	1.09277	0.019787	0.047618	0.068822	0.010672	0.15	69.6479874686717	0.74645	0.37689	0
195	YC_004	OutWard	N	5.43	YoungCon	0.795	2.5	0.26425	0.48563	0.06763	2.65554	0.019999	0.095924	0.1219	0.0059589	0.195	72.0729197994987	0.888	0.52778	0
196	YC_004	Inward	N	5.43	YoungCon	0.735	2	0.28869	0.51769	0.07801	1.80821	0.025097	0.069445	0.10725	0.012654	0.165	85.3959749373434	0.90692	0.57428	0.5
197	YC_004	OutWard	NE	5.43	YoungCon	0.825	2.5	0.25758	0.4586	0.10111	0.983651	0.01773	0.022891	0.051488	0.004401	0.18	66.5639273182957	0.87825	0.53788	0
198	YC_004	Inward	NE	5.43	YoungCon	1.02	3.5	0.22049	0.44006	0.08495	1.25908	0.022711	0.051629	0.064377	0.010283	0.15	69.5659323308271	0.85592	0.4623	0
199	YC_004	OutWard	E	5.43	YoungCon	1.065	2.5	0.20592	0.39181	0.15171	1.88046	0.019232	0.057586	0.11746	0.0097648	0.18	57.9329122807018	0.7546	0.39565	1
200	YC_004	Inward	E	5.43	YoungCon	0.915	2.5	0.21154	0.46326	0.03178	1.24038	0.033095	0.037662	0.041252	0.0087523	0.195	86.9723984962406	0.88708	0.58352	0.5
201	SP_004	OutWard	W	3.80	Patient	6.135	14	0.086154	0.15342	0.72785	8.82787	0.44913	0.14536	0.2606	0.0068595	0.465	9.82952230576441	0.24256	0.12638	6
202	SP_004	Inward	W	3.80	Patient	8.67	20	0.046259	0.15735	0.80815	10.1637	0.23169	0.16209	0.098138	0.0078758	0.645	8.54399523809524	0.25716	0.063749	5.5
203	SP_004	OutWard	NW	3.80	Patient	3.495	7	0.14712	0.18411	0.70989	8.64525	0.012313	0.032767	0.45586	0.0081235	0.75	9.10969398496241	0.29705	0.20302	0.5
204	SP_004	Inward	NW	3.80	Patient	6.045	13	0.078004	0.29152	0.39756	5.15983	0.43813	0.33142	0.27083	0.019043	0.63	12.4080511278195	0.52517	0.1673	5
205	SP_004	OutWard	N	3.80	Patient	4.035	9	0.090603	0.14657	0.61186	14.0461	0.31101	0.19376	0.19294	0.020601	0.81	6.88625012531328	0.23834	0.21376	1.5
206	SP_004	Inward	N	3.80	Patient	5.25	11	0.10385	0.25467	0.56281	3.687	0.13747	0.063119	0.019872	0.0022489	0.66	10.3947107769424	0.41991	0.18858	3.5
207	SP_004	OutWard	NE	3.80	Patient	3.735	8.5	0.16108	0.31497	0.47747	5.4708	0.029409	0.10506	0.12208	0.0084764	0.825	15.3054060150376	0.57006	0.18497	0.5
208	SP_004	Inward	NE	3.80	Patient	7.29	16.5	0.051473	0.14854	0.651	3.83906	0.31732	0.24517	0.18387	0.0033952	0.705	7.7741992481203	0.22146	0.088992	6
209	SP_004	OutWard	E	3.80	Patient	7.74	16.5	0.041935	0.13627	0.77192	19.0468	0.40436	0.075329	0.09464	0.012179	0.825	13.4933012531328	0.20717	0.064602	6.5
210	SP_004	Inward	E	3.80	Patient	5.385	12.5	0.084186	0.091125	0.81175	22.04	0.43156	0.21892	0.05786	0.010596	1.05	8.01160325814536	0.11193	0.14622	4
211	SP_004	OutWard	W	5.43	Patient	11.805	26.5	0.049235	0.14611	0.76949	15.4177	0.44529	0.13174	0.37372	0.0035695	0.63	8.0898305764411	0.2772	0.069581	13
212	SP_004	Inward	W	5.43	Patient	11.475	26.5	0.0221	0.083617	0.81892	11.8725	0.36923	0.31392	0.24768	0.006491	0.96	8.50981403508772	0.14779	0.035489	9.5
213	SP_004	OutWard	NW	5.43	Patient	5.01	13.5	0.078607	0.076467	0.88638	25.2799	0.45997	0.1802	0.12476	0.0091147	0.72	4.90410776942356	0.13022	0.10141	0.5
214	SP_004	Inward	NW	5.43	Patient	11.565	25.5	0.054591	0.2841	0.55772	10.2765	0.096408	0.19619	0.042543	0.016149	0.765	10.698549122807	0.53906	0.078042	10
215	SP_004	OutWard	N	5.43	Patient	5.565	13.5	0.07798	0.093894	0.85971	10.8536	0.36602	0.094433	0.044451	0.0039585	0.69	5.97485939849624	0.17203	0.11354	0.5
216	SP_004	Inward	N	5.43	Patient	16.785	47	0.027156	0.19227	0.64197	5.32016	0.40673	0.18949	0.18332	0.0027609	0.69	7.93917944862155	0.34977	0.051374	19.5
217	SP_004	OutWard	NE	5.43	Patient	4.125	9.5	0.096307	0.17455	0.64245	4.61487	0.22105	0.21144	0.26474	0.0072897	0.825	14.4842536340852	0.32344	0.14867	3
218	SP_004	Inward	NE	5.43	Patient	12.735	22	0.047638	0.16371	0.62595	2.05118	0.44178	0.3554	0.06204	0.011189	0.495	10.3545799498747	0.30682	0.094495	12
219	SP_004	OutWard	E	5.43	Patient	11.52	25.5	0.022579	0.2953	0.57679	13.4896	0.20554	0.12895	0.16554	0.0022393	1.455	21.8976022556391	0.55461	0.040395	6.5
220	SP_004	Inward	E	5.43	Patient	9.48	22	0.033311	0.042069	0.920997	27.1227	0.53464	0.15324	0.03261	0.0056267	0.93	3.94455413533835	0.065244	0.044315	5
221	AC_004	OutWard	W	3.80	AgedCon	1.605	2	0.23775	0.34288	0.05439	0.283395	0.012772	0.041721	0.092217	0.008178	0.24	27.6482882205514	0.61166	0.79442	0
222	AC_004	Inward	W	3.80	AgedCon	1.11	1	0.29643	0.35732	0.02294	1.06232	0.021086	0.024726	0.19678	0.013902	0.24	36.5998696741855	0.65609	1	0.5
223	AC_004	OutWard	NW	3.80	AgedCon	1.185	1.5	0.30835	0.36713	0.0561	1.20144	0.0056492	0.042995	0.19249	0.011446	0.255	32.7758997493734	0.6656	0.79592	0.5
224	AC_004	Inward	NW	3.80	AgedCon	1.17	1	0.26471	0.32496	0.02376	1.00369	0.0085102	0.030899	0.17111	0.018373	0.21	29.7823258145363	0.58445	1	0.5
225	AC_004	OutWard	N	3.80	AgedCon	1.125	1	0.38919	0.49034	0.02708	0.387276	0.028702	0.067236	0.015622	0.02383	0.255	35.8334586466165	0.86346	1	0
226	AC_004	Inward	N	3.80	AgedCon	1.32	1	0.33779	0.33389	0.0189	0.56165	0.01833	0.092016	0.17761	0.0058709	0.21	26.2554636591479	0.59535	1	0.5
227	AC_004	OutWard	NE	3.80	AgedCon	1.56	1.5	0.28274	0.3411	0.02262	0.982477	0.0095413	0.061755	0.14281	0.0055705	0.18	26.6449398496241	0.62118	0.86607	1
228	AC_004	Inward	NE	3.80	AgedCon	1.215	1	0.34547	0.47657	0.03994	0.9277	0.034842	0.059422	0.042139	0.024236	0.24	33.8169248120301	0.84038	1	1
229	AC_004	OutWard	E	3.80	AgedCon	1.635	2	0.22763	0.32024	0.0694399999999999	2.16385	0.008118	0.056892	0.063949	0.0098961	0.36	26.2868596491228	0.57053	0.71921	0.5
230	AC_004	Inward	E	3.80	AgedCon	1.17	1.5	0.36578	0.47272	0.0406300000000001	0.870849	0.034799	0.047632	0.087061	0.016673	0.24	33.0705363408521	0.87222	0.90816	1
231	AC_004	OutWard	W	5.43	AgedCon	2.04	3.5	0.18643	0.33887	0.33675	3.07912	0.017453	0.052427	0.067903	0.002809	0.255	24.5836007518797	0.6479	0.37248	0.5
232	AC_004	Inward	W	5.43	AgedCon	1.305	1.5	0.27015	0.31142	0.01301	0.32095	0.0082709	0.026422	0.11424	0.0049216	0.195	32.6247192982456	0.60081	0.91837	1
233	AC_004	OutWard	NW	5.43	AgedCon	1.575	2.5	0.19067	0.31946	0.03254	0.717896	0.019928	0.048682	0.17979	0.0026645	0.27	34.6464586466165	0.61761	0.61572	0.5
234	AC_004	Inward	NW	5.43	AgedCon	1.485	2.5	0.22279	0.36091	0.06121	1.19023	0.019647	0.04905	0.15907	0.0079384	0.195	33.4479448621554	0.69821	0.66939	1
235	AC_004	OutWard	N	5.43	AgedCon	1.62	2	0.2463	0.40657	0.03133	0.44892	0.01125	0.05055	0.080905	0.0054311	0.285	35.1028847117795	0.78607	0.71296	1
236	AC_004	Inward	N	5.43	AgedCon	1.62	1.5	0.23821	0.37098	0.0183	0.608975	0.016627	0.021402	0.098848	0.0047514	0.24	32.3784385964912	0.68285	0.8806	1.5
237	AC_004	OutWard	NE	5.43	AgedCon	1.395	1.5	0.33543	0.38061	0.03081	0.0511948	0.010837	0.039441	0.15482	0.0037105	0.195	30.6790551378446	0.71961	0.85849	1
238	AC_004	Inward	NE	5.43	AgedCon	1.41	2	0.2663	0.38162	0.02486	1.09001	0.020254	0.038017	0.054996	0.0037342	0.255	32.6761127819549	0.75379	0.7663	1
239	AC_004	OutWard	E	5.43	AgedCon	2.01	3.5	0.175	0.31397	0.07326	2.03036	0.016849	0.042549	0.088706	0.0047698	0.27	26.5900626566416	0.6048	0.57277	1.5
240	AC_004	Inward	E	5.43	AgedCon	1.335	1.5	0.31479	0.44392	0.02956	0.530726	0.015117	0.035947	0.07711	0.0064574	0.21	32.2223684210526	0.85989	0.83654	1
241	YC_005	OutWard	W	3.80	YoungCon	0.885	2	0.24074	0.50642	0.15641	5.68901	0.40801	0.077719	0.28144	0.0078593	0.12	60.7911403508772	0.86254	0.47222	0.5
242	YC_005	Inward	W	3.80	YoungCon	0.96	3	0.21765	0.58321	0.16834	4.0657	0.056102	0.1002	0.14335	0.0061648	0.135	87.4149122807018	0.80819	0.42255	0
243	YC_005	OutWard	NW	3.80	YoungCon	0.795	2	0.24928	0.50722	0.0628	3.5005	0.018585	0.048979	0.073563	0.013551	0.105	76.4026741854637	0.86521	0.68966	1
244	YC_005	Inward	NW	3.80	YoungCon	0.795	2.5	0.265	0.49152	0.12199	3.88067	0.022656	0.093933	0.091076	0.0088557	0.09	70.8533859649123	0.79146	0.51429	1
245	YC_005	OutWard	N	3.80	YoungCon	0.87	1.5	0.26496	0.43368	0.03282	1.00856	0.015773	0.091043	0.090956	0.0062998	0.15	63.8968070175439	0.74777	0.85	1
246	YC_005	Inward	N	3.80	YoungCon	0.81	1	0.24074	0.39296	0.03975	2.13745	0.013727	0.060989	0.053532	0.0063828	0.12	64.2734185463659	0.71002	1	1
247	YC_005	OutWard	NE	3.80	YoungCon	1.08	2.5	0.19493	0.38425	0.10757	1.32574	0.024856	0.13577	0.24607	0.0042796	0.135	54.0664335839599	0.66984	0.42424	0.5
248	YC_005	Inward	NE	3.80	YoungCon	0.81	2	0.22778	0.53887	0.1071	5.41359	0.014647	0.026659	0.073783	0.0080549	0.15	71.5588972431078	0.89119	0.52778	0.5
249	YC_005	OutWard	E	3.80	YoungCon	0.99	2.5	0.22675	0.35157	0.26846	3.63532	0.045387	0.12191	0.20531	0.034789	0.24	49.4064160401003	0.63368	0.43626	0.5
250	YC_005	Inward	E	3.80	YoungCon	0.885	2	0.25705	0.46971	0.09041	1.64821	0.032276	0.05727	0.047786	0.0082265	0.225	63.4735689223058	0.81036	0.60152	0.5
251	YC_005	OutWard	W	5.43	YoungCon	1.14	2.5	0.16932	0.38176	0.12114	1.04164	0.036972	0.043638	0.094941	0.022749	0.105	61.727045112782	0.74318	0.5104	0
252	YC_005	Inward	W	5.43	YoungCon	1.02	3.5	0.17152	0.48442	0.11717	3.20704	0.018244	0.028052	0.072207	0.01106	0.105	79.5372030075188	0.89666	0.4106	0
253	YC_005	OutWard	NW	5.43	YoungCon	0.825	1.5	0.23607	0.47308	0.0521	0.645145	0.020492	0.087333	0.10382	0.0050252	0.12	74.4827192982456	0.8562	0.73077	1
254	YC_005	Inward	NW	5.43	YoungCon	1.065	2	0.1859	0.42338	0.08865	2.78114	0.0056196	0.062158	0.12898	0.0041532	0.135	73.1661929824561	0.78962	0.41026	1
255	YC_005	OutWard	N	5.43	YoungCon	1.155	2.5	0.22264	0.4538	0.0607799999999999	1.41341	0.026779	0.020527	0.032844	0.0036529	0.12	56.5557443609023	0.86318	0.54453	1
256	YC_005	Inward	N	5.43	YoungCon	1.05	2.5	0.2	0.41411	0.06402	1.62355	0.028234	0.10149	0.066442	0.0045297	0.165	59.3340776942356	0.7878	0.48895	0.5
257	YC_005	OutWard	NE	5.43	YoungCon	1.11	2	0.22154	0.45153	0.05965	2.72588	0.013193	0.044328	0.1187	0.011613	0.135	55.4608847117794	0.78806	0.64376	0.5
258	YC_005	Inward	NE	5.43	YoungCon	1.065	2.5	0.21474	0.41718	0.07198	2.69261	0.025715	0.064091	0.054447	0.010896	0.135	63.1468320802005	0.80644	0.50481	0.5
259	YC_005	OutWard	E	5.43	YoungCon	1.29	3	0.14835	0.37496	0.11669	2.67212	0.012132	0.10293	0.082098	0.0068398	0.12	58.8761453634085	0.70882	0.39394	1
260	YC_005	Inward	E	5.43	YoungCon	1.125	2.5	0.19722	0.55979	0.12257	0.963206	0.029645	0.073549	0.099995	0.0012591	0.135	82.6083408521303	0.8638	0.42735	0.5
261	SP_005	OutWard	W	3.80	Patient	6.255	15	0.062876	0.061195	0.900158	3.62257	0.40953	0.32653	0.40018	0.037082	0.855	4.09454310776942	0.045564	0.09453	0
262	SP_005	Inward	W	3.80	Patient	2.94	4	0.16667	0.094924	0.82741	7.19494	0.065518	0.14212	0.34672	0.014536	0.27	6.04417644110276	0.11898	0.3348	-0.5
263	SP_005	OutWard	NW	3.80	Patient	5.4	14	0.069824	0.10195	0.82374	9.76811	0.46835	0.40703	0.40491	0.0068391	1.035	6.96284035087719	0.13847	0.13479	2
264	SP_005	Inward	NW	3.80	Patient	3.33	6	0.18871	0.18211	0.70769	9.142	0.32283	0.24175	0.15477	0.017761	0.345	6.03551954887218	0.29307	0.27153	-0.5
265	SP_005	OutWard	N	3.80	Patient	5.115	11	0.070422	0.054524	0.923485	9.93558	0.41385	0.32894	0.28132	0.015835	1.215	3.69506691729323	0.046485	0.089862	-0.5
266	SP_005	Inward	N	3.80	Patient	2.85	5	0.1916	0.13532	0.74283	8.12675	0.41777	0.1406	0.1249	0.041293	0.3	6.46901403508772	0.20204	0.24243	-0.5
267	SP_005	OutWard	NE	3.80	Patient	5.13	10.5	0.064736	0.092425	0.78926	10.0564	0.5224	0.07257	0.38185	0.006401	0.78	5.6165335839599	0.11614	0.11396	0
268	SP_005	Inward	NE	3.80	Patient	2.85	3.5	0.25946	0.25126	0.57232	4.34666	0.32569	0.26972	0.071439	0.013815	0.165	7.00115338345865	0.4276	0.38961	-0.5
269	SP_005	OutWard	E	3.80	Patient	5.745	12	0.07687	0.10766	0.79917	6.62771	0.1167	0.057818	0.40151	0.035094	0.675	7.08726666666667	0.13808	0.10763	1
270	SP_005	Inward	E	3.80	Patient	3.405	6.5	0.15539	0.10297	0.84321	14.0733	0.42953	0.11868	0.15652	0.019077	0.315	5.1429626566416	0.13671	0.21427	0.5
271	SP_005	OutWard	W	5.43	Patient	5.865	14	0.040802	0.04833	0.911365	21.3167	0.42268	0.20979	0.12746	0.011703	0.72	3.58983408521303	0.073724	0.072999	0.5
272	SP_005	Inward	W	5.43	Patient	2.805	3.5	0.21911	0.17383	0.77365	0.847638	0.044726	0.14755	0.35313	0.0003061	0.33	6.65027493734336	0.32671	0.26727	-0.5
273	SP_005	OutWard	NW	5.43	Patient	4.8	10.5	0.033355	0.012403	0.975858	23.1999	0.47217	0.2673	0.09236	0.0099379	0.675	2.12192360902256	-0.00019587	0.068693	-1
274	SP_005	Inward	NW	5.43	Patient	3.12	4.5	0.23518	0.25027	0.45565	5.89949	0.46534	0.072204	0.26619	0.0050577	0.27	8.87132456140351	0.4824	0.41998	1
275	SP_005	OutWard	N	5.43	Patient	3.195	6.5	0.13663	0.10035	0.82442	14.252	0.40911	0.22973	0.28536	0.0060668	0.63	5.21691353383459	0.17547	0.1938	-0.5
276	SP_005	Inward	N	5.43	Patient	3.555	6.5	0.20314	0.12798	0.8509	4.10686	0.54031	0.085444	0.15497	0.008825	0.135	6.36679548872181	0.23556	0.22121	0.5
277	SP_005	OutWard	NE	5.43	Patient	4.44	8.5	0.16346	0.14048	0.73518	7.29305	0.38788	0.18746	0.23381	0.0072767	0.24	7.0419	0.2606	0.1861	1.5
278	SP_005	Inward	NE	5.43	Patient	3.03	5	0.25506	0.24356	0.58576	1.64134	0.049792	0.11323	0.16263	0.012957	0.36	7.14636466165414	0.46359	0.35365	-0.5
279	SP_005	OutWard	E	5.43	Patient	4.35	9.5	0.084621	0.15801	0.59382	5.6781	0.44144	0.14207	0.11185	0.0020567	1.125	9.10424611528822	0.28969	0.18864	2
280	SP_005	Inward	E	5.43	Patient	4.26	10.5	0.12094	0.1146	0.86086	8.19331	0.44808	0.25751	0.11981	0.0026874	0.255	4.88430100250627	0.20775	0.13118	-0.5
281	AC_005	OutWard	W	3.80	AgedCon	1.425	1.5	0.24336	0.34174	0.04909	1.07363	0.011087	0.085892	0.11014	0.022763	0.285	26.0076240601504	0.61306	0.84328	0.5
282	AC_005	Inward	W	3.80	AgedCon	1.485	2	0.29706	0.46581	0.0611	2.13538	0.031408	0.042049	0.067033	0.012014	0.27	34.5731278195489	0.85883	0.69353	1
283	AC_005	OutWard	NW	3.80	AgedCon	1.35	2	0.26253	0.36735	0.07309	4.00266	0.013063	0.045579	0.11868	0.022873	0.3	30.9512355889724	0.64815	0.74405	0
284	AC_005	Inward	NW	3.80	AgedCon	1.53	2	0.23177	0.34545	0.12131	3.05032	0.025279	0.071155	0.13706	0.0097263	0.18	27.4280576441103	0.62203	0.62012	0.5
285	AC_005	OutWard	N	3.80	AgedCon	1.32	2	0.27536	0.32519	0.09406	1.30385	0.019398	0.10996	0.30299	0.022998	0.33	28.9914837092732	0.59117	0.66917	0
286	AC_005	Inward	N	3.80	AgedCon	1.5	2	0.2792	0.31101	0.16108	2.92047	0.054607	0.064227	0.093547	0.010282	0.21	20.528550877193	0.55234	0.70426	1
287	AC_005	OutWard	NE	3.80	AgedCon	1.86	1	0.30524	0.27751	0.01759	0.752504	0.0070722	0.11216	0.099254	0.0096915	0.255	21.5189784461153	0.48483	1	0.5
288	AC_005	Inward	NE	3.80	AgedCon	1.62	1.5	0.29364	0.3331	0.13154	1.99293	0.012687	0.056791	0.27479	0.0069419	0.225	19.4009243107769	0.59463	0.75	1
289	AC_005	OutWard	E	3.80	AgedCon	2.04	3.5	0.17786	0.17036	0.65588	9.92683	0.044727	0.12243	0.30437	0.0034027	0.315	16.4236463659148	0.25677	0.30187	0.5
290	AC_005	Inward	E	3.80	AgedCon	1.44	1	0.29385	0.38995	0.03653	1.32465	0.012231	0.048087	0.10224	0.003809	0.315	24.9584413533835	0.7139	1	1
291	AC_005	OutWard	W	5.43	AgedCon	2.25	3.5	0.14161	0.19471	0.48406	11.1936	0.013981	0.02985	0.14023	0.0049607	0.27	19.4961155388471	0.35021	0.31833	0.5
292	AC_005	Inward	W	5.43	AgedCon	1.635	2	0.33013	0.36789	0.05056	1.42147	0.02058	0.052596	0.050698	0.011354	0.195	30.4607443609023	0.71488	0.76058	1
293	AC_005	OutWard	NW	5.43	AgedCon	2.175	3.5	0.25149	0.38078	0.136	3.72795	0.028611	0.04907	0.099183	0.0048671	0.165	26.6402756892231	0.6814	0.51745	0
294	AC_005	Inward	NW	5.43	AgedCon	2.235	3.5	0.16048	0.26966	0.20548	1.46552	0.010078	0.075794	0.12712	0.00745	0.21	27.9388295739348	0.51838	0.42139	1
295	AC_005	OutWard	N	5.43	AgedCon	1.92	2.5	0.17565	0.23782	0.05947	1.59908	0.021966	0.062696	0.21112	0.0050499	0.345	21.3303694235589	0.45212	0.66593	1
296	AC_005	Inward	N	5.43	AgedCon	2.565	5.5	0.1955	0.28608	0.57995	5.291	0.022946	0.088325	0.10233	0.010446	0.15	17.0124679197995	0.53893	0.28069	1.5
297	AC_005	OutWard	NE	5.43	AgedCon	2.01	2.5	0.20345	0.24566	0.15543	1.35048	0.014545	0.044347	0.089842	0.0055965	0.24	19.5600185463659	0.47423	0.67795	0.5
298	AC_005	Inward	NE	5.43	AgedCon	1.875	2.5	0.25013	0.31099	0.05905	3.04348	0.024197	0.078342	0.069998	0.0065386	0.225	20.5258909774436	0.59052	0.68939	1
299	AC_005	OutWard	E	5.43	AgedCon	2.55	4.5	0.1895	0.28464	0.19588	0.340721	0.014622	0.021132	0.16493	0.0061562	0.21	23.1783413533835	0.5487	0.44296	1
300	AC_005	Inward	E	5.43	AgedCon	1.845	2.5	0.23525	0.35311	0.10774	2.03651	0.021716	0.053784	0.2833	0.0072828	0.24	24.2249601503759	0.68527	0.65395	1
301	YC_006	OutWard	W	3.80	YoungCon	0.87	1	0.24138	0.37893	0.0465	0.335212	0.016879	0.05073	0.10513	0.0091221	0.165	51.8416917293233	0.68491	1	0.5
302	YC_006	Inward	W	3.80	YoungCon	0.87	2	0.33854	0.57633	0.09765	1.90341	0.0096586	0.085413	0.11176	0.020128	0.15	58.5661528822055	0.82316	0.65071	0.5
303	YC_006	OutWard	NW	3.80	YoungCon	0.795	1.5	0.36286	0.50336	0.07604	2.12644	0.017328	0.047232	0.067651	0.0032466	0.18	56.7829473684211	0.89869	0.76786	0
304	YC_006	Inward	NW	3.80	YoungCon	0.675	1	0.39123	0.47382	0.03344	1.34108	0.0076148	0.025852	0.04992	0.0029657	0.105	54.3846065162907	0.86822	1	1
305	YC_006	OutWard	N	3.80	YoungCon	0.975	1	0.32244	0.44627	0.03901	0.856412	0.014108	0.029466	0.061003	0.0019535	0.15	49.9951854636591	0.829	1	0
306	YC_006	Inward	N	3.80	YoungCon	0.6	1	0.4144	0.48523	0.01839	0.612265	0.021424	0.061681	0.10716	0.011595	0.15	56.0906140350877	0.89621	1	1
307	YC_006	OutWard	NE	3.80	YoungCon	0.885	2	0.27189	0.46047	0.17816	5.87152	0.018329	0.085297	0.16576	0.003943	0.225	59.0602631578947	0.77962	0.54205	1
308	YC_006	Inward	NE	3.80	YoungCon	0.99	1.5	0.28062	0.4227	0.04621	0.975255	0.028649	0.10966	0.12501	0.0029105	0.15	53.9418320802005	0.76496	0.84	1
309	YC_006	OutWard	E	3.80	YoungCon	0.885	1.5	0.27184	0.47288	0.07313	1.29824	0.014344	0.031458	0.04075	0.0010594	0.21	46.9973634085213	0.86953	0.76667	1
310	YC_006	Inward	E	3.80	YoungCon	0.72	1.5	0.38889	0.54982	0.0668299999999999	0.666859	0.027048	0.061621	0.056489	0.0046467	0.18	58.275335839599	0.88765	0.80645	1
311	YC_006	OutWard	W	5.43	YoungCon	1.185	2.5	0.18974	0.41118	0.07874	1.03747	0.015283	0.034571	0.057352	0.00647	0.15	50.786365914787	0.79793	0.55536	0.5
312	YC_006	Inward	W	5.43	YoungCon	0.96	2	0.25955	0.47198	0.03505	1.43799	0.016778	0.032197	0.086828	0.0032682	0.15	62.4080325814536	0.91392	0.64818	1.5
313	YC_006	OutWard	NW	5.43	YoungCon	0.915	2.5	0.24213	0.41352	0.03616	1.72927	0.032663	0.14454	0.063004	0.012579	0.15	46.7413884711779	0.80526	0.59583	0.5
314	YC_006	Inward	NW	5.43	YoungCon	0.99	2.5	0.28612	0.47437	0.03982	0.215611	0.025926	0.042344	0.045998	0.00075652	0.135	58.1708120300752	0.90526	0.6151	0.5
315	YC_006	OutWard	N	5.43	YoungCon	1.035	2.5	0.25576	0.4808	0.05248	0.353234	0.0072754	0.07451	0.085583	0.0034886	0.18	55.4543533834587	0.87281	0.55401	1
316	YC_006	Inward	N	5.43	YoungCon	0.855	1.5	0.34921	0.53277	0.0269	0.577125	0.021995	0.035044	0.034715	0.01062	0.12	62.6887894736842	0.92987	0.75	0
317	YC_006	OutWard	NE	5.43	YoungCon	1.05	2.5	0.20016	0.43981	0.0629999999999999	1.76049	0.016091	0.07742	0.094366	0.00059882	0.18	58.1895187969925	0.85221	0.54944	1
318	YC_006	Inward	NE	5.43	YoungCon	0.9	3	0.25	0.48704	0.04944	1.16901	0.020606	0.070944	0.049291	0.002916	0.15	70.7997218045113	0.87646	0.52586	1.5
319	YC_006	OutWard	E	5.43	YoungCon	1.32	3	0.20282	0.45735	0.07525	0.9009	0.01209	0.038498	0.073866	0.00065293	0.195	56.7344085213033	0.88835	0.42329	2
320	YC_006	Inward	E	5.43	YoungCon	0.975	2	0.24074	0.56691	0.1017	1.5708	0.030431	0.079073	0.062705	0.0043557	0.165	66.9288621553885	0.83716	0.52315	1
321	SP_006	OutWard	W	3.80	Patient	2.25	6	0.17768	0.25883	0.54533	8.52846	0.81007	0.30088	0.34225	0.019566	0.42	27.6310601503759	0.44675	0.27768	0.5
322	SP_006	Inward	W	3.80	Patient	1.335	3.5	0.32371	0.40776	0.23714	4.41231	0.062457	0.046468	0.16208	0.045018	0.255	39.6902330827068	0.76145	0.4734	0
323	SP_006	OutWard	NW	3.80	Patient	1.965	4.5	0.2011	0.32014	0.4256	9.29024	0.12861	0.10852	0.12817	0.033291	0.435	32.4059122807018	0.55808	0.39309	0
324	SP_006	Inward	NW	3.80	Patient	1.725	3.5	0.35418	0.36107	0.39147	1.42132	0.18483	0.13841	0.14276	0.015862	0.12	26.5659674185464	0.65267	0.48419	0
325	SP_006	OutWard	N	3.80	Patient	2.13	4.5	0.26311	0.38097	0.41342	14.2033	0.28765	0.26791	0.24117	0.044312	0.255	30.3516766917293	0.60105	0.3471	0
326	SP_006	Inward	N	3.80	Patient	1.74	4	0.31034	0.46148	0.30936	3.3677	0.29593	0.2204	0.11563	0.018638	0.105	24.1759962406015	0.69174	0.4832	0.5
327	SP_006	OutWard	NE	3.80	Patient	2.22	6	0.1901	0.33044	0.46056	5.74447	0.24843	0.2325	0.21728	0.0060062	0.3	20.7384147869674	0.47366	0.31597	1
328	SP_006	Inward	NE	3.80	Patient	2.22	6	0.21142	0.23512	0.5564	9.39587	0.67808	0.34046	0.16782	0.016738	0.15	20.2784588972431	0.36955	0.31877	0.5
329	SP_006	OutWard	E	3.80	Patient	1.92	5	0.22844	0.25966	0.49132	12.5534	0.055813	0.078267	0.25571	0.026994	0.255	29.7894411027569	0.41462	0.33037	0
330	SP_006	Inward	E	3.80	Patient	1.575	4	0.18878	0.31097	0.43364	7.56185	0.27953	0.10493	0.13935	0.016904	0.39	24.8411393483709	0.52807	0.39031	0.5
331	SP_006	OutWard	W	5.43	Patient	3.63	11.5	0.069575	0.22949	0.54429	9.60294	0.20046	0.17638	0.23041	0.010444	0.495	31.7148521303258	0.43737	0.1307	2.5
332	SP_006	Inward	W	5.43	Patient	2.115	6	0.23851	0.37479	0.34907	5.87091	0.21298	0.18845	0.23158	0.0059008	0.24	34.7196741854637	0.71234	0.35781	0.5
333	SP_006	OutWard	NW	5.43	Patient	2.895	8	0.18193	0.23388	0.47703	9.58823	0.23447	0.21413	0.19221	0.0018742	0.21	19.1178854636591	0.45314	0.25458	0.5
334	SP_006	Inward	NW	5.43	Patient	3.57	10.5	0.13373	0.36318	0.37615	0.390409	0.050891	0.070402	0.11152	0.0094847	0.24	26.1690626566416	0.69539	0.20165	2
335	SP_006	OutWard	N	5.43	Patient	2.835	8.5	0.14303	0.36588	0.42711	3.86228	0.41831	0.092707	0.094364	0.0072799	0.285	29.545022556391	0.58383	0.22298	3
336	SP_006	Inward	N	5.43	Patient	2.22	6	0.23529	0.2237	0.50238	6.66568	0.019745	0.27739	0.27971	0.0058229	0.225	20.889656641604	0.38231	0.36103	2
337	SP_006	OutWard	NE	5.43	Patient	2.61	6	0.13988	0.28678	0.47746	4.6189	0.026795	0.074406	0.11545	0.0029903	0.3	25.5485463659148	0.51154	0.23284	2
338	SP_006	Inward	NE	5.43	Patient	2.04	5	0.20269	0.30773	0.39806	6.18641	0.23324	0.19908	0.05507	0.0068854	0.255	20.8172055137845	0.59099	0.3614	1
339	SP_006	OutWard	E	5.43	Patient	2.385	5.5	0.20998	0.28883	0.42626	7.04533	0.0075457	0.23228	0.19683	0.0071708	0.24	29.3542857142857	0.52459	0.33435	1.5
340	SP_006	Inward	E	5.43	Patient	2.145	6	0.15772	0.20006	0.65715	4.19855	0.27139	0.19261	0.18745	0.0063595	0.24	21.0263588972431	0.34453	0.23543	1.5
341	AC_006	OutWard	W	3.80	AgedCon	0.87	1	0.41164	0.41198	0.0438	0.818692	0.0065001	0.07674	0.22472	0.0060481	0.21	34.0031453634085	0.74576	1	1
342	AC_006	Inward	W	3.80	AgedCon	0.945	1.5	0.31754	0.45849	0.04545	0.311857	0.010335	0.041596	0.10043	0.0019621	0.18	41.0600100250627	0.84073	0.84375	0.5
343	AC_006	OutWard	NW	3.80	AgedCon	0.855	1	0.35857	0.42466	0.03592	1.32125	0.014923	0.03855	0.1389	0.0023048	0.21	38.5161378446115	0.77795	1	1
344	AC_006	Inward	NW	3.80	AgedCon	0.795	1	0.35826	0.4732	0.03313	1.15982	0.021574	0.017392	0.069324	0.0051182	0.195	45.9732581453634	0.88172	1	0
345	AC_006	OutWard	N	3.80	AgedCon	0.945	1	0.40972	0.4663	0.0109399999999999	0.436005	0.011241	0.031115	0.068974	0.0028154	0.195	37.8693959899749	0.87031	1	1
346	AC_006	Inward	N	3.80	AgedCon	0.78	1.5	0.40774	0.46295	0.04699	0.821844	0.017799	0.041334	0.087261	0.0037895	0.18	42.6793182957393	0.85282	0.875	0
347	AC_006	OutWard	NE	3.80	AgedCon	0.96	1	0.375	0.43514	0.01202	0.0783781	0.0085031	0.042939	0.072194	0.001659	0.195	34.399037593985	0.80017	1	1
348	AC_006	Inward	NE	3.80	AgedCon	0.855	1	0.35099	0.45133	0.02858	0.343703	0.011024	0.042781	0.072627	0.0013146	0.195	38.6247117794486	0.82395	1	1
349	AC_006	OutWard	E	3.80	AgedCon	0.99	1.5	0.35	0.38547	0.13331	1.14262	0.017478	0.080218	0.14244	0.013637	0.255	34.969037593985	0.69957	0.81667	1
350	AC_006	Inward	E	3.80	AgedCon	0.93	1.5	0.32292	0.37653	0.0756599999999999	1.18363	0.01537	0.060725	0.14746	0.0015661	0.195	35.3927719298246	0.6804	0.83333	0
351	AC_006	OutWard	W	5.43	AgedCon	1.11	1	0.325	0.34857	0.00609999999999999	0.143299	0.015823	0.04493	0.15826	0.0020194	0.18	30.2614260651629	0.67465	1	0.5
352	AC_006	Inward	W	5.43	AgedCon	1.005	2	0.30777	0.41891	0.04255	0.400964	0.0089231	0.031611	0.092629	0.0035312	0.21	39.1168822055138	0.81194	0.71613	1
353	AC_006	OutWard	NW	5.43	AgedCon	1.23	1	0.26845	0.36491	0.01422	0.558865	0.019095	0.047678	0.13686	0.0018646	0.21	34.2395989974937	0.70326	1	1
354	AC_006	Inward	NW	5.43	AgedCon	1.005	1.5	0.31339	0.42203	0.02369	0.250508	0.013138	0.044751	0.082042	0.0055924	0.18	40.0445513784461	0.82382	0.85714	0.5
355	AC_006	OutWard	N	5.43	AgedCon	1.065	1	0.33744	0.44625	0.01862	0.622554	0.014809	0.062101	0.03438	0.0044509	0.21	38.1063834586466	0.86502	1	1
356	AC_006	Inward	N	5.43	AgedCon	1.005	1.5	0.3383	0.4207	0.01563	0.22956	0.019518	0.058191	0.11601	0.0018456	0.18	36.6682606516291	0.81197	0.84694	1
357	AC_006	OutWard	NE	5.43	AgedCon	1.095	1	0.30188	0.37497	0.01542	0.485848	0.021583	0.019	0.030576	0.0045079	0.195	35.2880651629073	0.73024	1	0.5
358	AC_006	Inward	NE	5.43	AgedCon	1.14	1.5	0.30557	0.41909	0.02639	0.673287	0.016356	0.047278	0.0413	0.0030872	0.18	34.4450325814536	0.81085	0.87143	1
359	AC_006	OutWard	E	5.43	AgedCon	1.185	2	0.28214	0.37851	0.05631	0.410668	0.014648	0.048942	0.050919	0.00388	0.21	36.536373433584	0.73919	0.77083	1
360	AC_006	Inward	E	5.43	AgedCon	1.305	2.5	0.26427	0.42511	0.0311399999999999	0.415762	0.012181	0.033652	0.13886	0.0012849	0.18	37.1490125313283	0.82845	0.70137	1
361	YC_007	OutWard	W	3.80	YoungCon	0.795	2	0.24038	0.36482	0.16132	1.71376	0.017293	0.096228	0.14728	0.0053513	0.225	60.4077117794486	0.66659	0.59524	0
362	YC_007	Inward	W	3.80	YoungCon	0.66	2	0.31884	0.57399	0.0700499999999999	1.7288	0.021838	0.060912	0.042492	0.0074283	0.165	88.4312431077694	0.87846	0.58816	0.5
363	YC_007	OutWard	NW	3.80	YoungCon	0.825	2.5	0.26155	0.43449	0.19022	1.33692	0.028884	0.082226	0.1828	0.015779	0.18	56.9191203007519	0.77907	0.51726	0
364	YC_007	Inward	NW	3.80	YoungCon	0.675	2	0.28854	0.47744	0.07931	1.79276	0.024431	0.060589	0.10077	0.0044935	0.195	77.2758897243108	0.8288	0.5998	0
365	YC_007	OutWard	N	3.80	YoungCon	0.735	2	0.30602	0.46253	0.06457	1.14351	0.0055284	0.097987	0.12223	0.014979	0.195	56.7322581453634	0.85927	0.66783	-1
366	YC_007	Inward	N	3.80	YoungCon	0.735	2	0.28583	0.4706	0.06143	1.94343	0.023563	0.010987	0.033602	0.0092803	0.18	70.8992606516291	0.86251	0.6125	0
367	YC_007	OutWard	NE	3.80	YoungCon	0.96	2.5	0.26563	0.42828	0.14733	3.71689	0.0086911	0.052927	0.16061	0.0023431	0.225	50.8355413533835	0.76706	0.53125	0
368	YC_007	Inward	NE	3.80	YoungCon	0.84	1	0.26756	0.54561	0.02947	1.47156	0.019407	0.051512	0.040849	0.0074692	0.165	69.2437042606516	0.92448	1	0
369	YC_007	OutWard	E	3.80	YoungCon	0.975	2.5	0.21667	0.36451	0.19865	1.8806	0.26618	0.031448	0.33921	0.005029	0.195	52.8806065162907	0.66668	0.47291	0
370	YC_007	Inward	E	3.80	YoungCon	0.72	1.5	0.32206	0.5183	0.08429	0.927124	0.012687	0.050914	0.070371	0.012278	0.21	70.4949323308271	0.84804	0.8	0
371	YC_007	OutWard	W	5.43	YoungCon	0.99	2.5	0.18586	0.36927	0.19789	3.04125	0.010655	0.044653	0.049188	0.0057335	0.24	63.5368070175439	0.71016	0.40049	0.5
372	YC_007	Inward	W	5.43	YoungCon	0.78	3	0.24631	0.40119	0.10217	2.56692	0.0062242	0.089904	0.10914	0.006446	0.18	71.462037593985	0.78179	0.50675	0
373	YC_007	OutWard	NW	5.43	YoungCon	0.99	1.5	0.21232	0.4497	0.0196	0.866324	0.019183	0.060074	0.037945	0.0052984	0.21	68.7634661654135	0.8217	0.875	0
374	YC_007	Inward	NW	5.43	YoungCon	0.72	1.5	0.26286	0.46923	0.02701	0.825416	0.018323	0.069785	0.069266	0.006202	0.195	71.8791428571429	0.86972	0.8	1
375	YC_007	OutWard	N	5.43	YoungCon	0.93	2	0.24526	0.44914	0.06243	0.830613	0.013761	0.051917	0.038407	0.0090528	0.195	64.3281228070176	0.8774	0.56324	0.5
376	YC_007	Inward	N	5.43	YoungCon	0.78	1.5	0.26963	0.46729	0.02679	0.855374	0.025996	0.041472	0.05596	0.0058205	0.195	70.0870100250627	0.90177	0.82	0.5
377	YC_007	OutWard	NE	5.43	YoungCon	0.99	3	0.21544	0.43964	0.09844	2.35227	0.01377	0.025541	0.052271	0.0017708	0.21	57.9719974937343	0.84666	0.51316	0
378	YC_007	Inward	NE	5.43	YoungCon	1.155	2	0.18089	0.51571	0.04902	0.333235	0.0067895	0.056592	0.038231	0.00066732	0.18	70.5969172932331	0.91344	0.41565	0
379	YC_007	OutWard	E	5.43	YoungCon	0.99	2.5	0.22794	0.39315	0.20433	3.70423	0.00235	0.037574	0.04735	0.007001	0.225	54.407380952381	0.75504	0.47059	0.5
380	YC_007	Inward	E	5.43	YoungCon	0.825	2	0.25397	0.47641	0.08487	4.04374	0.015558	0.066461	0.072236	0.0078704	0.195	74.7531754385965	0.81275	0.52646	0
381	SP_007	OutWard	W	3.80	Patient	1.83	2	0.49954	0.49076	0.10427	1.11923	0.010117	0.083492	0.13695	0.021489	2.91	20.3698962406015	0.84076	0.79348	0
382	SP_007	Inward	W	3.80	Patient	2.835	4.5	0.21667	0.24539	0.62685	13.1359	0.0016292	0.093771	0.31493	0.0065919	0.315	11.458543358396	0.44725	0.27626	0
383	SP_007	OutWard	NW	3.80	Patient	1.815	2.5	0.4004	0.404	0.33565	3.30025	0.038958	0.068757	0.22713	0.0006374	2.205	16.0590458646617	0.70845	0.57991	0.5
384	SP_007	Inward	NW	3.80	Patient	1.89	2	0.37373	0.36971	0.2355	1.51323	0.020198	0.068847	0.28191	0.021533	0.24	14.8339270676692	0.65866	0.64471	-0.5
385	SP_007	OutWard	N	3.80	Patient	3.405	6.5	0.17742	0.23001	0.74186	4.7995	0.1209	0.069265	0.30757	0.031493	4.02	9.99395714285714	0.4027	0.19386	1
386	SP_007	Inward	N	3.80	Patient	1.62	1.5	0.45313	0.52093	0.05076	0.572167	0.091833	0.087368	0.027351	0.0011649	0.12	13.8627533834586	0.86254	0.88281	0.5
387	SP_007	OutWard	NE	3.80	Patient	5.295	10	0.054432	0.064378	0.8735	64.3994	0.0069485	0.079258	0.04964	0.0011533	4.26	4.05406090225564	0.066395	0.1165	0.5
388	SP_007	Inward	NE	3.80	Patient	2.805	4.5	0.29025	0.29314	0.51818	2.45912	0.02699	0.082444	0.0011057	0.0066858	0.12	12.1982832080201	0.5127	0.35882	1.5
389	SP_007	OutWard	E	3.80	Patient	5.325	10	0.11896	0.096349	0.83079	1.81845	0.41333	0.44104	0.42921	0.022889	1.53	6.61901203007519	0.13058	0.17123	3
390	SP_007	Inward	E	3.80	Patient	1.845	3	0.31135	0.28736	0.27826	9.16754	0.037135	0.0021162	0.24051	0.011394	0.255	16.7667350877193	0.50513	0.59128	0.5
391	SP_007	OutWard	W	5.43	Patient	4.32	9.5	0.23138	0.29259	0.47255	4.01137	0.50923	0.10113	0.2963	0.0014868	1.77	12.4802674185464	0.56277	0.33726	1.5
392	SP_007	Inward	W	5.43	Patient	4.38	8	0.19804	0.26689	0.45229	0.669809	0.021701	0.06092	0.12016	0.0016503	0.42	10.8928939849624	0.4958	0.37028	2
393	SP_007	OutWard	NW	5.43	Patient	3.09	6	0.20227	0.13749	0.7484	1.25373	0.003408	0.081747	0.11218	0.00039623	0.795	8.3609694235589	0.24975	0.27509	1
394	SP_007	Inward	NW	5.43	Patient	2.715	4	0.29299	0.29086	0.55871	2.74336	0.027176	0.088246	0.41413	0.00040899	0.195	11.7105303258145	0.56078	0.37903	0
395	SP_007	OutWard	N	5.43	Patient	2.67	4.5	0.23928	0.15895	0.69869	3.00814	0.028761	0.17626	0.053143	0.0049011	2.76	8.64832230576441	0.29974	0.326	1
396	SP_007	Inward	N	5.43	Patient	3.015	5	0.25666	0.29174	0.53391	4.86996	0.037711	0.098011	0.0099693	0.0059358	0.435	10.5369586466165	0.55676	0.33987	1
397	SP_007	OutWard	NE	5.43	Patient	5.97	14	0.114	0.1318	0.78789	19.8653	0.50559	0.014634	0.022905	0.005056	1.02	9.01209649122807	0.25	0.14146	4
398	SP_007	Inward	NE	5.43	Patient	3.78	8	0.16332	0.26264	0.47739	8.87142	0.064702	0.2445	0.033879	0.0013381	0.3	10.2021476190476	0.48948	0.31793	2.5
399	SP_007	OutWard	E	5.43	Patient	4.035	7.5	0.16288	0.2189	0.60931	2.72899	0.088991	0.091733	0.33787	0.0049158	3.75	9.61015062656642	0.41377	0.24482	0.5
400	SP_007	Inward	E	5.43	Patient	2.76	4.5	0.2663	0.36179	0.1536	5.24201	0.048177	0.083155	0.15232	0.0038102	0.255	20.0566962406015	0.67882	0.50543	3.5
401	AC_007	OutWard	W	3.80	AgedCon	1.11	1.5	0.25678	0.3032	0.0265300000000001	0.934002	0.01639	0.026709	0.24193	0.0015234	0.33	31.6298045112782	0.54925	0.89744	0.5
402	AC_007	Inward	W	3.80	AgedCon	0.975	1.5	0.26015	0.33304	0.13654	0.884246	0.01518	0.037729	0.12216	0.0055428	0.255	37.6509072681704	0.60547	0.76667	0
403	AC_007	OutWard	NW	3.80	AgedCon	0.99	2	0.2619	0.40649	0.22935	2.96291	0.017854	0.053858	0.049897	0.0040252	0.33	41.7111453634085	0.74146	0.50848	-0.5
404	AC_007	Inward	NW	3.80	AgedCon	1.155	2	0.22381	0.35304	0.20933	0.957525	0.0083185	0.067356	0.13165	0.0013076	0.24	35.5577318295739	0.63745	0.62251	0
405	AC_007	OutWard	N	3.80	AgedCon	1.02	1	0.2803	0.34899	0.02273	0.33862	0.013663	0.020054	0.14233	0.0064638	0.27	35.8110426065163	0.63712	1	0
406	AC_007	Inward	N	3.80	AgedCon	1.005	2	0.27143	0.33887	0.23762	2.19883	0.01333	0.078955	0.14038	0.005497	0.3	36.8674711779449	0.60429	0.59643	1
407	AC_007	OutWard	NE	3.80	AgedCon	1.08	1.5	0.2967	0.35648	0.11407	0.693664	0.0057889	0.05119	0.22136	0.0068063	0.3	31.498969924812	0.64976	0.8	1
408	AC_007	Inward	NE	3.80	AgedCon	0.93	1	0.33367	0.41836	0.02856	1.1613	0.017498	0.049453	0.117	0.0024541	0.285	37.5460200501253	0.75963	1	0
409	AC_007	OutWard	E	3.80	AgedCon	1.245	2	0.25378	0.34028	0.26898	2.29397	0.0077995	0.076975	0.16599	0.0035948	0.33	28.3525864661654	0.61604	0.50526	0.5
410	AC_007	Inward	E	3.80	AgedCon	0.96	1	0.30331	0.39455	0.01847	0.682954	0.02122	0.076758	0.085327	0.0053761	0.3	41.5089248120301	0.71969	1	0
411	AC_007	OutWard	W	5.43	AgedCon	1.32	3	0.22132	0.30525	0.273	2.90343	0.01002	0.031106	0.070099	0.0042545	0.315	31.720656641604	0.59896	0.454	0
412	AC_007	Inward	W	5.43	AgedCon	1.08	2	0.23611	0.28921	0.26103	0.667375	0.0074488	0.063634	0.19861	0.0055386	0.21	34.0974686716792	0.55881	0.58611	0
413	AC_007	OutWard	NW	5.43	AgedCon	1.095	2.5	0.22857	0.30435	0.26616	4.02477	0.012184	0.013433	0.026563	0.0035489	0.33	37.4275438596491	0.58662	0.47857	-0.5
414	AC_007	Inward	NW	5.43	AgedCon	1.26	2	0.16676	0.23573	0.07451	1.7421	0.012186	0.038913	0.1825	0.0028959	0.27	32.8966240601504	0.44735	0.61502	-0.5
415	AC_007	OutWard	N	5.43	AgedCon	1.14	2	0.27616	0.38024	0.0686099999999999	1.89154	0.016048	0.037205	0.16325	0.0020549	0.27	33.3281503759399	0.71836	0.73389	0.5
416	AC_007	Inward	N	5.43	AgedCon	1.185	2.5	0.21429	0.30684	0.08971	0.965206	0.014666	0.052384	0.056723	0.0039104	0.285	38.7555413533835	0.5884	0.61905	0.5
417	AC_007	OutWard	NE	5.43	AgedCon	1.245	2	0.24202	0.35055	0.11076	1.66454	0.014447	0.048885	0.17544	0.0059688	0.3	34.0544235588972	0.67695	0.67592	1
418	AC_007	Inward	NE	5.43	AgedCon	1.08	2	0.26136	0.39196	0.02728	1.39626	0.021839	0.080194	0.060532	0.0094191	0.3	36.1581253132832	0.75852	0.81439	0
419	AC_007	OutWard	E	5.43	AgedCon	1.545	1.5	0.18458	0.29452	0.01958	0.499584	0.012376	0.043537	0.20114	0.0014148	0.345	31.3399523809524	0.57176	0.88182	0
420	AC_007	Inward	E	5.43	AgedCon	1.065	1.5	0.32512	0.49798	0.0246	0.820581	0.0081318	0.074249	0.055093	0.0017612	0.285	43.3912781954887	0.83769	0.89189	1
421	YC_008	OutWard	W	3.80	YoungCon	0.915	1.5	0.26131	0.33933	0.16451	0.710678	0.45898	0.15212	0.43323	0.0063745	0.18	46.8399598997494	0.60578	0.79687	0
422	YC_008	Inward	W	3.80	YoungCon	0.825	2.5	0.29333	0.4201	0.05022	2.11225	0.015367	0.092422	0.10806	0.0020608	0.18	50.6451879699248	0.78707	0.64	1
423	YC_008	OutWard	NW	3.80	YoungCon	0.855	1.5	0.29815	0.4318	0.0786	1.38485	0.021299	0.06708	0.084979	0.0023182	0.15	49.8698395989975	0.7856	0.81481	0
424	YC_008	Inward	NW	3.80	YoungCon	0.885	1.5	0.32051	0.42583	0.05616	2.19003	0.004169	0.016085	0.078785	0.0017346	0.12	47.3177293233083	0.79213	0.81481	0.5
425	YC_008	OutWard	N	3.80	YoungCon	1.065	2	0.25084	0.35204	0.07823	0.505632	0.0062627	0.040443	0.14203	0.0044182	0.165	43.9098696741855	0.64202	0.64713	0
426	YC_008	Inward	N	3.80	YoungCon	0.87	2	0.27917	0.47262	0.14068	0.974428	0.024087	0.072153	0.043622	0.0087139	0.21	50.6311654135338	0.86821	0.56154	0
427	YC_008	OutWard	NE	3.80	YoungCon	0.9	2	0.21875	0.38578	0.29343	1.41836	0.033013	0.0603	0.12331	0.0066955	0.165	54.8047218045113	0.71207	0.43527	-0.5
428	YC_008	Inward	NE	3.80	YoungCon	0.975	2	0.23794	0.36742	0.26563	1.04934	0.013021	0.075875	0.11362	0.0048742	0.165	50.6130651629073	0.65968	0.46199	0.5
429	YC_008	OutWard	E	3.80	YoungCon	0.945	2	0.25463	0.43448	0.11866	0.541387	0.11403	0.099223	0.070144	0.034673	0.3	48.5769724310777	0.80094	0.65692	0
430	YC_008	Inward	E	3.80	YoungCon	0.75	1.5	0.3129	0.42821	0.07677	1.01628	0.09406	0.089511	0.073426	0.031358	0.165	54.8255664160401	0.77894	0.77419	0.5
431	YC_008	OutWard	W	5.43	YoungCon	1.02	2	0.24167	0.37763	0.12218	1.05093	0.0075666	0.042703	0.065287	0.0028291	0.135	44.8966015037594	0.72862	0.55556	0
432	YC_008	Inward	W	5.43	YoungCon	1.005	2	0.22477	0.381	0.04198	0.280711	0.012207	0.032332	0.14401	0.0011756	0.15	50.9017669172932	0.73229	0.64585	0.5
433	YC_008	OutWard	NW	5.43	YoungCon	1.215	3	0.19869	0.42991	0.04927	0.928785	0.02725	0.10222	0.15306	0.014412	0.105	51.6004210526316	0.80616	0.50183	1.5
434	YC_008	Inward	NW	5.43	YoungCon	1.125	2	0.228	0.42729	0.0484599999999999	1.21421	0.029444	0.042128	0.085595	0.0062095	0.105	51.3561829573935	0.80732	0.56814	1
435	YC_008	OutWard	N	5.43	YoungCon	1.035	2.5	0.22114	0.45453	0.02932	0.962699	0.01887	0.081119	0.11187	0.001677	0.18	55.6139724310777	0.86979	0.56259	1.5
436	YC_008	Inward	N	5.43	YoungCon	1.11	2	0.20862	0.43738	0.02756	0.757081	0.016531	0.066646	0.092761	0.0016257	0.165	51.6868295739348	0.84645	0.52814	0.5
437	YC_008	OutWard	NE	5.43	YoungCon	1.065	2.5	0.19091	0.37723	0.1454	2.81626	0.014276	0.048284	0.13239	0.0049041	0.195	50.4179949874687	0.7285	0.47236	0
438	YC_008	Inward	NE	5.43	YoungCon	0.945	1.5	0.22756	0.39698	0.02307	0.472117	0.01864	0.035807	0.080618	0.0067849	0.18	53.0926190476191	0.77106	0.82857	1
439	YC_008	OutWard	E	5.43	YoungCon	1.11	3	0.20249	0.37205	0.14969	1.49641	0.010477	0.065328	0.14047	0.0083215	0.195	50.7131177944862	0.72532	0.40497	0.5
440	YC_008	Inward	E	5.43	YoungCon	0.93	2	0.28571	0.50893	0.08526	2.32744	0.0092831	0.034304	0.091706	0.00738	0.21	60.9164010025063	0.92411	0.55952	0
441	SP_008	OutWard	W	3.80	Patient	4.215	7.5	0.10236	0.12558	0.69422	4.86558	0.012918	0.010726	0.019296	0.003816	0.51	9.48646691729323	0.17854	0.18041	2
442	SP_008	Inward	W	3.80	Patient	4.74	9	0.14559	0.29901	0.44774	12.4051	0.031902	0.030029	0.082538	0.015489	0.39	12.8194701754386	0.51534	0.24407	3
443	SP_008	OutWard	NW	3.80	Patient	5.16	9	0.12431	0.21713	0.64279	7.35548	0.24153	0.042791	0.28608	0.00046993	0.645	8.2161328320802	0.35718	0.19268	-0.5
444	SP_008	Inward	NW	3.80	Patient	5.565	9	0.13748	0.4491	0.20023	8.50284	0.0071467	0.12128	0.019508	0.0092325	0.315	13.6925744360902	0.72676	0.30154	4.5
445	SP_008	OutWard	N	3.80	Patient	5.97	10.5	0.10176	0.22795	0.61702	16.6187	0.44851	0.076037	0.0084465	0.01303	0.42	9.85023233082707	0.37081	0.16282	3
446	SP_008	Inward	N	3.80	Patient	4.755	8	0.089802	0.23473	0.5649	7.79909	0.02565	0.092852	0.1904	0.0018878	0.525	8.97723558897243	0.38407	0.18653	0
447	SP_008	OutWard	NE	3.80	Patient	5.025	9	0.065393	0.10858	0.66915	35.3228	0.32513	0.052664	0.35242	0.018136	0.795	10.3465556390977	0.14064	0.18896	0
448	SP_008	Inward	NE	3.80	Patient	5.37	8.5	0.16784	0.41379	0.43037	13.4012	0.081927	0.074343	0.36177	0.0088382	0.375	11.8939290726817	0.6308	0.24612	3
449	SP_008	OutWard	E	3.80	Patient	6.27	12.5	0.065264	0.094253	0.75562	27.8546	0.0087373	0.049161	0.081141	0.0053741	0.42	5.97801704260652	0.13009	0.14018	1
450	SP_008	Inward	E	3.80	Patient	5.655	10.5	0.084419	0.21489	0.63869	16.5208	0.40451	0.31212	0.27697	0.0045139	0.465	12.3500330827068	0.33233	0.12943	4
451	SP_008	OutWard	W	5.43	Patient	5.625	11.5	0.026875	0.035639	0.939794	89.0453	0.068195	0.13044	0.12941	0.00064471	0.6	2.52591177944862	0.04793	0.04308	0.5
452	SP_008	Inward	W	5.43	Patient	5.655	12.5	0.067184	0.2385	0.53489	5.80158	0.017432	0.053887	0.23051	0.0017976	0.42	15.4748045112782	0.45619	0.10954	5.5
453	SP_008	OutWard	NW	5.43	Patient	7.035	16.5	0.076969	0.14938	0.80342	15.3546	0.0058255	0.02353	0.3824	0.004292	0.45	6.89263533834586	0.18542	0.10304	2.5
454	SP_008	Inward	NW	5.43	Patient	8.205	17	0.077274	0.32425	0.33201	2.02507	0.32122	0.2004	0.12287	0.0019724	0.3	13.9987819548872	0.61629	0.16112	7.5
455	SP_008	OutWard	N	5.43	Patient	4.995	8	0.12647	0.28468	0.41426	7.37598	0.012932	0.071133	0.05202	0.00063469	0.45	9.59250050125313	0.5396	0.26389	1.5
456	SP_008	Inward	N	5.43	Patient	7.08	13.5	0.086174	0.23446	0.65808	19.0343	0.081257	0.0038693	0.038154	0.0039667	0.405	10.2424050125313	0.43797	0.11322	3
457	SP_008	OutWard	NE	5.43	Patient	5.565	10.5	0.089432	0.19683	0.52618	24.3673	0.31881	0.095508	0.057579	0.0012498	0.39	13.8538987468672	0.34025	0.19806	2.5
458	SP_008	Inward	NE	5.43	Patient	5.01	8.5	0.11283	0.21982	0.58329	10.6013	0.0064915	0.24855	0.027981	0.003854	0.33	10.2552521303258	0.412	0.18138	2.5
459	SP_008	OutWard	E	5.43	Patient	5.91	12.5	0.05376	0.13179	0.6438	5.05322	0.010561	0.24102	0.10577	0.0068374	0.405	10.9363030075188	0.24662	0.1162	1.5
460	SP_008	Inward	E	5.43	Patient	4.11	8	0.10397	0.16933	0.72187	3.88364	0.0025864	0.098887	0.035016	0.0029129	0.345	12.2722934837093	0.31772	0.13601	1
461	AC_008	OutWard	W	3.80	AgedCon	1.065	1	0.27885	0.39339	0.02965	0.816071	0.026186	0.11108	0.1466	0.014568	0.195	35.4316967418546	0.71946	1	0
462	AC_008	Inward	W	3.80	AgedCon	1.035	2	0.26786	0.44272	0.0533	0.778058	0.012061	0.086141	0.14575	0.002894	0.15	42.9372456140351	0.80441	0.66765	1
463	AC_008	OutWard	NW	3.80	AgedCon	0.87	2	0.3125	0.41062	0.23555	5.74527	0.019717	0.055606	0.10217	0.032291	0.21	44.4661904761905	0.74089	0.58796	-0.5
464	AC_008	Inward	NW	3.80	AgedCon	0.855	2	0.2946	0.40999	0.09646	1.99372	0.027519	0.044323	0.047052	0.025695	0.195	50.9972080200501	0.74983	0.63177	0
465	AC_008	OutWard	N	3.80	AgedCon	0.93	1	0.32163	0.4121	0.0156500000000001	0.580769	0.023432	0.030622	0.027841	0.0064125	0.18	39.7406140350877	0.76369	1	1
466	AC_008	Inward	N	3.80	AgedCon	1.2	1.5	0.23864	0.4601	0.02069	0.519524	0.017344	0.019511	0.019002	0.0094435	0.195	46.7787218045113	0.84282	0.85227	0
467	AC_008	OutWard	NE	3.80	AgedCon	1.05	1.5	0.30232	0.40541	0.039	1.01558	0.010898	0.071105	0.091231	0.012396	0.18	35.2080125313283	0.75147	0.83333	-0.5
468	AC_008	Inward	NE	3.80	AgedCon	0.9	2	0.33333	0.47372	0.0625	1.66903	0.020334	0.040647	0.056555	0.0053413	0.24	49.9532731829574	0.83219	0.69697	1
469	AC_008	OutWard	E	3.80	AgedCon	1.215	1.5	0.2899	0.37868	0.02871	0.409991	0.018025	0.039182	0.11068	0.013654	0.18	35.364962406015	0.67541	0.90323	0
470	AC_008	Inward	E	3.80	AgedCon	1.17	2	0.26554	0.43927	0.0296999999999999	0.940189	0.0055427	0.071979	0.090672	0.0048662	0.165	38.1214335839599	0.80419	0.65483	0.5
471	AC_008	OutWard	W	5.43	AgedCon	1.065	1.5	0.36166	0.46767	0.02476	0.267789	0.012221	0.011489	0.12819	0.0081085	0.18	37.2657418546366	0.91375	0.86905	0
472	AC_008	Inward	W	5.43	AgedCon	1.065	1	0.27991	0.4738	0.00609999999999999	0.102628	0.041066	0.094431	0.065414	0.0067394	0.165	44.5666240601504	0.89533	1	1
473	AC_008	OutWard	NW	5.43	AgedCon	0.99	2.5	0.24265	0.33783	0.2605	3.69617	0.010506	0.025003	0.069423	0.017598	0.195	40.8521102756892	0.65463	0.51923	0
474	AC_008	Inward	NW	5.43	AgedCon	1.05	1.5	0.25799	0.40449	0.01196	0.418202	0.015948	0.036408	0.069887	0.0015692	0.18	47.2037844611529	0.78169	0.89189	0
475	AC_008	OutWard	N	5.43	AgedCon	1.05	1	0.24346	0.35021	0.01228	0.226667	0.012702	0.018796	0.064449	0.01168	0.21	39.2477794486216	0.67796	1	0.5
476	AC_008	Inward	N	5.43	AgedCon	1.2	2.5	0.2254	0.44747	0.13042	0.567669	0.016843	0.09981	0.13275	0.010654	0.18	41.786969924812	0.86681	0.55048	0
477	AC_008	OutWard	NE	5.43	AgedCon	1.23	1.5	0.23535	0.40142	0.01441	0.250813	0.020367	0.076572	0.10781	0.0022995	0.195	35.9225313283208	0.76976	0.82222	0.5
478	AC_008	Inward	NE	5.43	AgedCon	0.96	1.5	0.30662	0.40985	0.01877	0.410075	0.013535	0.046248	0.07132	0.0068031	0.18	43.4270902255639	0.79544	0.88462	0.5
479	AC_008	OutWard	E	5.43	AgedCon	1.11	1.5	0.31453	0.39084	0.0164299999999999	0.270727	0.0070643	0.091938	0.11419	0.0050191	0.195	39.4087869674185	0.76281	0.87755	1
480	AC_008	Inward	E	5.43	AgedCon	0.915	2	0.37286	0.55598	0.03437	0.611808	0.018069	0.06668	0.028647	0.0094268	0.21	44.7193107769424	0.8792	0.75107	0.5
481	YC_009	OutWard	W	3.80	YoungCon	0.78	2	0.24167	0.34491	0.29379	4.10367	0.018257	0.067726	0.11427	0.0014557	0.165	53.4597568922306	0.61883	0.4875	0
482	YC_009	Inward	W	3.80	YoungCon	0.75	2	0.27043	0.48712	0.16675	6.93652	0.0093807	0.074727	0.091346	0.00063578	0.18	67.7170250626566	0.8115	0.56	0.5
483	YC_009	OutWard	NW	3.80	YoungCon	0.93	2	0.22794	0.36543	0.21188	2.49629	0.029847	0.10025	0.13599	0.001038	0.195	52.3050902255639	0.65947	0.4916	0.5
484	YC_009	Inward	NW	3.80	YoungCon	0.93	2.5	0.23459	0.44929	0.1301	4.41879	0.030501	0.024386	0.078981	0.00095291	0.18	61.1054235588973	0.81407	0.48919	1.5
485	YC_009	OutWard	N	3.80	YoungCon	0.915	2	0.26293	0.45179	0.11699	1.23745	0.027686	0.0933	0.13165	0.0056796	0.165	53.6631102756892	0.83109	0.55873	0.5
486	YC_009	Inward	N	3.80	YoungCon	0.825	1.5	0.28288	0.44967	0.05024	0.521593	0.018161	0.080294	0.10525	0.0040265	0.15	54.8283107769424	0.81481	0.82	1
487	YC_009	OutWard	NE	3.80	YoungCon	1.11	2	0.23095	0.3821	0.12685	1.72574	0.0095715	0.062705	0.10655	0.0009571	0.165	51.2310802005013	0.7061	0.60952	0
488	YC_009	Inward	NE	3.80	YoungCon	0.69	1.5	0.30435	0.36818	0.0458499999999999	1.29746	0.016788	0.082563	0.1094	0.0023397	0.18	51.7892606516291	0.65725	0.87879	0
489	YC_009	OutWard	E	3.80	YoungCon	1.095	2	0.17793	0.29808	0.34772	4.05594	0.014275	0.071982	0.11206	0.001142	0.18	46.4769598997494	0.52466	0.44444	0.5
490	YC_009	Inward	E	3.80	YoungCon	0.795	2.5	0.245	0.47098	0.1291	6.24123	0.012061	0.088542	0.107	0.0011165	0.18	81.2951403508772	0.76001	0.51429	0
491	YC_009	OutWard	W	5.43	YoungCon	1.11	2.5	0.16718	0.32941	0.25375	4.02251	0.020817	0.039939	0.13282	0.0025491	0.21	56.5760852130326	0.62607	0.34335	0
492	YC_009	Inward	W	5.43	YoungCon	0.945	2.5	0.22228	0.41865	0.10659	6.05232	0.018686	0.044769	0.05789	0.0016625	0.165	79.4782255639098	0.77991	0.51971	0
493	YC_009	OutWard	NW	5.43	YoungCon	1.005	2	0.21013	0.42985	0.06969	1.56338	0.015866	0.035049	0.023287	0.005119	0.195	62.3103107769424	0.83207	0.53257	0
494	YC_009	Inward	NW	5.43	YoungCon	0.945	2.5	0.2379	0.44068	0.0767600000000001	1.88003	0.022019	0.042622	0.039377	0.0028407	0.165	56.9175037593985	0.84911	0.56956	0.5
495	YC_009	OutWard	N	5.43	YoungCon	0.96	2.5	0.2654	0.47887	0.05052	0.798353	0.0094311	0.022557	0.072672	0.00251	0.195	57.8560551378446	0.9099	0.62041	0.5
496	YC_009	Inward	N	5.43	YoungCon	0.87	1.5	0.27718	0.44473	0.02851	0.437685	0.0066457	0.028887	0.073985	0.011051	0.15	60.6894937343358	0.8627	0.8125	0.5
497	YC_009	OutWard	NE	5.43	YoungCon	1.23	2.5	0.18298	0.4272	0.04541	1.06698	0.018371	0.038489	0.087054	0.0020402	0.18	58.2111453634085	0.81588	0.52257	1
498	YC_009	Inward	NE	5.43	YoungCon	0.855	2	0.26481	0.48682	0.06751	2.26653	0.012127	0.063425	0.047823	0.0092811	0.15	63.4697192982456	0.89565	0.61667	0.5
499	YC_009	OutWard	E	5.43	YoungCon	1.02	2	0.22059	0.37193	0.09975	2.23489	0.013281	0.0663	0.069573	0.008812	0.195	57.839305764411	0.71071	0.53723	0
500	YC_009	Inward	E	5.43	YoungCon	1.005	3	0.19677	0.52057	0.16889	5.03982	0.028832	0.10462	0.16302	0.0044375	0.18	84.8299498746867	0.77368	0.37926	0.5
501	SP_009	OutWard	W	3.80	Patient	4.65	9	0.13537	0.23495	0.6771	1.90001	0.47544	0.15797	0.092255	0.0035822	0.615	7.73356115288221	0.39808	0.17742	1.5
502	SP_009	Inward	W	3.80	Patient	5.34	9	0.17662	0.15191	0.70907	3.56896	0.34812	0.066282	0.062671	0.0052402	0.375	4.39650100250627	0.24156	0.28301	0.5
503	SP_009	OutWard	NW	3.80	Patient	3.855	5.5	0.32193	0.28919	0.54499	8.79148	0.085794	0.10644	0.31	0.011261	0.33	6.71724411027569	0.51727	0.42625	-0.5
504	SP_009	Inward	NW	3.80	Patient	4.32	7	0.25143	0.20391	0.75185	5.28014	0.41264	0.15362	0.059309	0.0029244	0.33	5.44068045112782	0.33586	0.28502	0
505	SP_009	OutWard	N	3.80	Patient	4.005	7.5	0.16891	0.15866	0.7962	8.25596	0.37559	0.1693	0.08908	0.0097184	0.54	5.3955634085213	0.2527	0.21669	0
506	SP_009	Inward	N	3.80	Patient	4.005	6.5	0.27165	0.24621	0.71174	3.36941	0.42095	0.12596	0.28206	0.034187	0.36	5.59581929824561	0.42265	0.31873	0.5
507	SP_009	OutWard	NE	3.80	Patient	6.18	12.5	0.08547	0.09845	0.80621	6.91802	0.44858	0.041214	0.43062	0.00886	0.75	4.76109423558897	0.14071	0.139	1
508	SP_009	Inward	NE	3.80	Patient	3.975	6	0.2257	0.23036	0.69184	3.97801	0.40029	0.11475	0.2684	0.035609	0.84	6.34563609022556	0.38396	0.28411	0
509	SP_009	OutWard	E	3.80	Patient	12.03	21.5	0.076838	0.095424	0.86691	4.72582	0.10192	0.41148	0.33847	0.0046107	0.69	2.79866115288221	0.12761	0.10289	2.5
510	SP_009	Inward	E	3.80	Patient	2.475	4	0.11197	0.069477	0.85795	4.6479	0.056407	0.14989	0.042623	0.0017972	0.48	5.31712506265664	0.063142	0.19111	0
511	SP_009	OutWard	W	5.43	Patient	3.99	6	0.23054	0.17593	0.75318	0.928542	0.038439	0.069425	0.13939	0.005854	0.3	6.28642807017544	0.32655	0.27819	0
512	SP_009	Inward	W	5.43	Patient	4.41	7.5	0.24247	0.239	0.69175	4.13436	0.40563	0.21074	0.33804	0.003963	0.36	5.76696817042607	0.43147	0.31708	0
513	SP_009	OutWard	NW	5.43	Patient	4.14	7	0.24143	0.23012	0.68324	8.56057	0.51226	0.055426	0.046091	0.0027497	0.42	5.47265413533835	0.44108	0.29262	1
514	SP_009	Inward	NW	5.43	Patient	4.845	9.5	0.17991	0.21691	0.66534	2.75352	0.34301	0.079887	0.16938	0.0052668	0.3	5.96030802005013	0.40949	0.26785	0
515	SP_009	OutWard	N	5.43	Patient	5.505	11	0.17143	0.21117	0.7121	2.33689	0.45461	0.059402	0.17966	0.0055498	0.39	6.26069974937343	0.40032	0.20962	0.5
516	SP_009	Inward	N	5.43	Patient	5.295	9.5	0.13257	0.11445	0.81706	3.73783	0.036762	0.18805	0.13896	0.010898	0.27	5.30531428571429	0.2075	0.16405	0.5
517	SP_009	OutWard	NE	5.43	Patient	5.04	10	0.064103	0.072653	0.84931	4.99102	0.48067	0.1524	0.26692	0.0084921	0.825	5.07261804511278	0.1222	0.11919	1.5
518	SP_009	Inward	NE	5.43	Patient	4.68	8.5	0.17791	0.12753	0.85372	5.97742	0.46991	0.055244	0.22822	0.0175	0.555	4.31867694235589	0.23136	0.18915	-0.5
519	SP_009	OutWard	E	5.43	Patient	9.81	16.5	0.097871	0.14062	0.80245	9.31206	0.26297	0.092077	0.31524	0.0034309	1.155	5.80968496240602	0.26191	0.12039	5.5
520	SP_009	Inward	E	5.43	Patient	2.865	4.5	0.16344	0.1346	0.7678	2.91335	0.026872	0.19265	0.11007	0.0016292	0.465	7.56279323308271	0.23643	0.21144	0
521	AC_009	OutWard	W	3.80	AgedCon	1.275	2.5	0.20682	0.31313	0.37144	2.37171	0.00709	0.13137	0.08247	0.0066482	0.18	29.288656641604	0.55343	0.39886	0
522	AC_009	Inward	W	3.80	AgedCon	0.945	1	0.29154	0.34785	0.02282	1.16692	0.0095414	0.015333	0.11133	0.010115	0.18	39.8502531328321	0.6353	1	0
523	AC_009	OutWard	NW	3.80	AgedCon	1.11	2	0.27801	0.39668	0.0838	0.490607	0.020165	0.047423	0.092088	0.01962	0.18	37.8894110275689	0.72626	0.67381	-0.5
524	AC_009	Inward	NW	3.80	AgedCon	1.2	1	0.2162	0.31965	0.01745	0.871125	0.017249	0.030195	0.085423	0.0050106	0.15	34.6801027568922	0.57273	1	0
525	AC_009	OutWard	N	3.80	AgedCon	1.26	2	0.3497	0.37787	0.09827	1.28718	0.045159	0.088246	0.18727	0.0089237	0.195	29.886992481203	0.6923	0.78125	0
526	AC_009	Inward	N	3.80	AgedCon	1.395	1	0.21888	0.39355	0.01358	0.255559	0.018513	0.02133	0.036128	0.0020894	0.195	36.3395213032581	0.71483	1	1
527	AC_009	OutWard	NE	3.80	AgedCon	1.32	1.5	0.27865	0.35315	0.08418	2.33511	0.017905	0.05612	0.1254	0.010367	0.24	29.818298245614	0.6383	0.8125	1
528	AC_009	Inward	NE	3.80	AgedCon	1.005	1	0.34185	0.48031	0.01469	0.435012	0.0097761	0.020915	0.064553	0.0096898	0.21	37.519373433584	0.86348	1	0
529	AC_009	OutWard	E	3.80	AgedCon	1.23	1	0.28369	0.36762	0.02057	0.404635	0.011952	0.059599	0.2281	0.013124	0.3	27.4673483709273	0.66948	1	1
530	AC_009	Inward	E	3.80	AgedCon	1.065	1.5	0.30081	0.3851	0.09973	0.626839	0.015915	0.093139	0.15521	0.022143	0.24	35.9601904761905	0.70884	0.79268	0
531	AC_009	OutWard	W	5.43	AgedCon	1.08	1.5	0.24942	0.27404	0.06347	0.450571	0.011148	0.11733	0.032059	0.010096	0.21	31.1835889724311	0.52955	0.84146	-0.5
532	AC_009	Inward	W	5.43	AgedCon	1.14	2	0.26389	0.38045	0.02682	0.597756	0.018819	0.013733	0.092318	0.0086945	0.165	41.0941779448622	0.73979	0.71944	0.5
533	AC_009	OutWard	NW	5.43	AgedCon	0.975	1	0.24762	0.30897	0.01189	0.173261	0.012283	0.070356	0.1654	0.011085	0.21	39.5032380952381	0.59556	1	0
534	AC_009	Inward	NW	5.43	AgedCon	1.095	1.5	0.27402	0.39976	0.01692	0.339188	0.011982	0.043368	0.090098	0.0087816	0.165	38.2091127819549	0.77946	0.86842	1
535	AC_009	OutWard	N	5.43	AgedCon	1.38	1	0.32482	0.38289	0.00970000000000004	0.361209	0.0070914	0.069579	0.096382	0.0015452	0.105	32.0306441102757	0.74705	1	1
536	AC_009	Inward	N	5.43	AgedCon	1.08	1	0.26371	0.33603	0.00670999999999999	0.383574	0.0075172	0.016225	0.075003	0.0015053	0.18	34.9490325814536	0.64557	1	0.5
537	AC_009	OutWard	NE	5.43	AgedCon	1.185	1	0.27888	0.35961	0.01189	0.300062	0.0052074	0.01954	0.12884	0.0047688	0.18	32.4482130325815	0.67195	1	1
538	AC_009	Inward	NE	5.43	AgedCon	1.065	1.5	0.29571	0.36762	0.02865	0.476684	0.014416	0.037078	0.094445	0.012412	0.18	35.746015037594	0.70972	0.87838	0
539	AC_009	OutWard	E	5.43	AgedCon	1.14	1.5	0.27685	0.32942	0.0188199999999999	0.870867	0.0089784	0.071046	0.18828	0.0075071	0.195	30.3819824561403	0.63604	0.95918	1
540	AC_009	Inward	E	5.43	AgedCon	1.35	2	0.26186	0.40975	0.02674	0.913301	0.019239	0.048643	0.11912	0.0025683	0.195	37.0770350877193	0.80586	0.75038	1
541	YC_010	OutWard	W	3.80	YoungCon	0.99	2	0.26	0.46132	0.0849299999999999	1.39877	0.01993	0.069871	0.086843	0.014672	0.21	59.4539749373434	0.84764	0.53942	0
542	YC_010	Inward	W	3.80	YoungCon	0.795	2	0.39391	0.55535	0.09062	1.57286	0.0087473	0.0359	0.036102	0.019969	0.135	71.1205313283208	0.88424	0.68609	1
543	YC_010	OutWard	NW	3.80	YoungCon	0.87	2	0.27586	0.47929	0.07701	3.05359	0.0030371	0.02745	0.017662	0.016862	0.21	59.2604335839599	0.86242	0.60345	1
544	YC_010	Inward	NW	3.80	YoungCon	0.93	2.5	0.27885	0.48355	0.09352	2.5303	0.016124	0.042185	0.08704	0.0091742	0.195	56.1923082706767	0.86756	0.58534	0
545	YC_010	OutWard	N	3.80	YoungCon	0.645	1	0.44363	0.49539	0.02396	0.496124	0.033472	0.070962	0.11511	0.015731	0.18	51.5094110275689	0.86278	1	0.5
546	YC_010	Inward	N	3.80	YoungCon	0.585	1	0.43684	0.478	0.02245	0.371949	0.022536	0.063822	0.027881	0.012579	0.18	54.7067794486216	0.85414	1	0
547	YC_010	OutWard	NE	3.80	YoungCon	0.9	2	0.30134	0.53749	0.06553	3.40194	0.024068	0.090211	0.029573	0.002875	0.24	62.0852606516291	0.82962	0.54911	1
548	YC_010	Inward	NE	3.80	YoungCon	0.795	1.5	0.32883	0.4382	0.03413	1.3281	0.0079909	0.015941	0.065327	0.015266	0.21	44.8899047619048	0.78439	0.85185	0
549	YC_010	OutWard	E	3.80	YoungCon	1.065	3.5	0.22333	0.43196	0.24729	2.77746	0.013441	0.11744	0.13628	0.013175	0.225	52.3504586466165	0.77883	0.40286	0
550	YC_010	Inward	E	3.80	YoungCon	0.84	2	0.31034	0.57515	0.08306	1.62502	0.022734	0.05531	0.082414	0.013512	0.225	70.9074511278196	0.84228	0.62069	0.5
551	YC_010	OutWard	W	5.43	YoungCon	1.125	2	0.21521	0.46489	0.08247	1.31788	0.008032	0.10527	0.088606	0.0048282	0.24	67.8311328320802	0.81623	0.46111	0
552	YC_010	Inward	W	5.43	YoungCon	0.795	2	0.37565	0.63237	0.0948	1.94749	0.019671	0.063967	0.043723	0.0052373	0.18	77.3345438596491	0.74612	0.66537	0
553	YC_010	OutWard	NW	5.43	YoungCon	0.78	2	0.3101	0.53139	0.07746	2.38855	0.032194	0.056889	0.021241	0.0089016	0.21	69.7600852130326	0.89771	0.64303	0
554	YC_010	Inward	NW	5.43	YoungCon	0.87	2	0.30602	0.54968	0.03482	1.24581	0.016261	0.052531	0.03261	0.0036422	0.21	67.3876616541353	0.89569	0.62636	0
555	YC_010	OutWard	N	5.43	YoungCon	0.915	2.5	0.30952	0.58219	0.06045	1.19272	0.036298	0.038394	0.054151	0.0055819	0.21	58.6277368421053	0.8314	0.60786	1
556	YC_010	Inward	N	5.43	YoungCon	0.765	2	0.33308	0.51163	0.03977	0.757826	0.026898	0.030038	0.04628	0.011192	0.21	66.0901278195489	0.94621	0.66615	1
557	YC_010	OutWard	NE	5.43	YoungCon	1.035	2	0.2744	0.48774	0.0731000000000001	3.3393	0.017748	0.050243	0.061986	0.0050503	0.21	49.5542681704261	0.91469	0.56026	0
558	YC_010	Inward	NE	5.43	YoungCon	0.885	2	0.30195	0.48843	0.04017	0.973894	0.0087943	0.047651	0.061162	0.0061585	0.195	56.9071679197995	0.89178	0.64448	0
559	YC_010	OutWard	E	5.43	YoungCon	1.02	2	0.23607	0.41755	0.07048	0.253059	0.018834	0.02725	0.033538	0.0067627	0.21	52.8912180451128	0.80693	0.584	0
560	YC_010	Inward	E	5.43	YoungCon	0.99	2.5	0.28788	0.51258	0.0557	0.47508	0.021334	0.040076	0.066482	0.0056302	0.24	59.5764310776942	0.90877	0.53758	0
561	SP_010	OutWard	W	3.80	Patient	3	6.5	0.12922	0.33691	0.18457	3.5954	0.40335	0.090999	0.1832	0.026549	0.39	14.808335839599	0.47384	0.41133	2
562	SP_010	Inward	W	3.80	Patient	3.09	4.5	0.16643	0.32055	0.49442	9.71895	0.66453	0.56254	0.5954	0.0058842	0.15	22.6611443609023	0.49838	0.31974	2.5
563	SP_010	OutWard	NW	3.80	Patient	5.325	10.5	0.050359	0.17023	0.57716	2.77433	0.045048	0.16787	0.32493	0.052464	0.27	16.5060959899749	0.27698	0.10702	2.5
564	SP_010	Inward	NW	3.80	Patient	2.76	4	0.07888	0.13488	0.68458	9.44448	0.014424	0.28223	0.36512	0.025864	0.225	18.7904275689223	0.19707	0.18865	0
565	SP_010	OutWard	N	3.80	Patient	5.325	9.5	0.07568	0.17535	0.58147	4.44644	0.019709	0.073793	0.12009	0.021561	0.18	14.1582674185464	0.28582	0.19179	0
566	SP_010	Inward	N	3.80	Patient	3.21	6	0.093187	0.18172	0.5586	2.75388	0.010704	0.034193	0.062098	0.018339	0.3	13.8414546365915	0.30404	0.2097	0.5
567	SP_010	OutWard	NE	3.80	Patient	5.325	13	0.054414	0.16064	0.73792	24.4877	0.060815	0.10492	0.29576	0.01521	0.33	14.5366669172932	0.1756	0.086981	1
568	SP_010	Inward	NE	3.80	Patient	3.84	5.5	0.11011	0.13129	0.75407	5.72508	0.40977	0.28356	0.34461	0.014009	0.195	10.6403496240602	0.18241	0.17471	-0.5
569	SP_010	OutWard	E	3.80	Patient	3.42	5.5	0.1744	0.20698	0.68322	5.49177	0.082536	0.15732	0.22559	0.034677	0.345	8.8040701754386	0.32373	0.21429	-0.5
570	SP_010	Inward	E	3.80	Patient	3.015	4.5	0.19607	0.31877	0.33088	9.26228	0.029429	0.13024	0.16057	0.016544	0.255	15.2083067669173	0.564	0.45849	-0.5
571	SP_010	OutWard	W	5.43	Patient	4.92	9	0.11336	0.19458	0.6147	9.83656	0.43526	0.1161	0.15758	0.0071488	0.375	11.4042240601504	0.35574	0.18875	1.5
572	SP_010	Inward	W	5.43	Patient	3.945	6.5	0.1687	0.31854	0.36059	13.0775	0.042965	0.092236	0.17986	0.0026241	0.255	15.1972619047619	0.54226	0.28579	0.5
573	SP_010	OutWard	NW	5.43	Patient	5.265	12.5	0.053893	0.12609	0.69089	17.0162	0.11757	0.1779	0.28145	0.022639	0.24	16.4112832080201	0.23245	0.12152	0.5
574	SP_010	Inward	NW	5.43	Patient	6.165	14.5	0.051768	0.15374	0.45195	9.64266	0.027169	0.1647	0.19956	0.014873	0.27	23.7164115288221	0.28364	0.11629	5
575	SP_010	OutWard	N	5.43	Patient	4.785	8.5	0.059466	0.14415	0.75112	8.54124	0.016605	0.081638	0.25717	0.012077	0.285	12.8224145363409	0.17427	0.13721	0.5
576	SP_010	Inward	N	5.43	Patient	3.3	7	0.083874	0.15262	0.75753	8.07078	0.36786	0.19294	0.30139	0.0080827	0.285	8.69472005012531	0.27702	0.14334	1.5
577	SP_010	OutWard	NE	5.43	Patient	5.52	9.5	0.058571	0.16819	0.45386	11.3895	0.016009	0.31816	0.15019	0.0069539	0.255	14.1066228070175	0.28702	0.18137	0
578	SP_010	Inward	NE	5.43	Patient	3.435	6.5	0.111	0.19104	0.64038	21.8192	0.49054	0.29609	0.32938	0.013967	0.27	13.3823170426065	0.32847	0.20392	1
579	SP_010	OutWard	E	5.43	Patient	4.875	10.5	0.096267	0.35509	0.40331	8.81668	0.48436	0.14177	0.29646	0.0098963	0.24	16.3902952380952	0.50011	0.1717	3.5
580	SP_010	Inward	E	5.43	Patient	3.63	6.5	0.15982	0.31328	0.30655	5.91426	0.030532	0.1006	0.17247	0.0058406	0.24	18.0672471177945	0.5876	0.26694	2.5
581	AC_010	OutWard	W	3.80	AgedCon	1.02	1	0.33824	0.40333	0.03298	1.19067	0.020737	0.037947	0.051098	0.011815	0.33	37.695335839599	0.74298	1	1
582	AC_010	Inward	W	3.80	AgedCon	1.29	2	0.45983	0.45099	0.0747	1.93866	0.0267	0.06864	0.093388	0.0042428	0.075	46.9405914786967	0.79497	0.73256	1
583	AC_010	OutWard	NW	3.80	AgedCon	0.96	1	0.36806	0.49497	0.02822	0.502971	0.021285	0.065505	0.083115	0.0060154	0.3	39.0199398496241	0.87406	1	0.5
584	AC_010	Inward	NW	3.80	AgedCon	1.215	2.5	0.22991	0.37123	0.18601	4.28625	0.01573	0.054275	0.10289	0.010712	0.315	42.7591904761905	0.66947	0.51845	1
585	AC_010	OutWard	N	3.80	AgedCon	0.975	1	0.35938	0.43301	0.04169	1.49821	0.013194	0.043176	0.04543	0.0025632	0.33	39.523962406015	0.80337	1	1
586	AC_010	Inward	N	3.80	AgedCon	1.02	1	0.32292	0.43779	0.03391	1.31487	0.0077918	0.079787	0.063449	0.005108	0.3	38.1859473684211	0.8065	1	1
587	AC_010	OutWard	NE	3.80	AgedCon	0.975	1	0.38056	0.45273	0.04155	1.74966	0.008198	0.089924	0.12563	0.010794	0.285	33.8442155388471	0.80057	1	1
588	AC_010	Inward	NE	3.80	AgedCon	0.975	1	0.35632	0.45015	0.03495	1.10359	0.021946	0.050028	0.047995	0.0070255	0.27	36.789671679198	0.80082	1	1
589	AC_010	OutWard	E	3.80	AgedCon	1.2	2	0.22514	0.30592	0.06365	2.26159	0.01452	0.064067	0.19384	0.0063637	0.45	33.5777142857143	0.54949	0.72384	0.5
590	AC_010	Inward	E	3.80	AgedCon	1.185	2	0.27853	0.56492	0.08323	2.82695	0.0035455	0.052882	0.051867	0.004628	0.345	44.1689273182957	0.8274	0.55705	1
591	AC_010	OutWard	W	5.43	AgedCon	1.35	2	0.2332	0.3616	0.09266	0.681968	0.014985	0.075735	0.065888	0.0014025	0.345	31.8707543859649	0.71248	0.64783	0.5
592	AC_010	Inward	W	5.43	AgedCon	1.23	1.5	0.37203	0.47133	0.07223	0.447181	0.016173	0.060741	0.064433	0.0056485	0.24	46.5958571428571	0.88884	0.80189	0.5
593	AC_010	OutWard	NW	5.43	AgedCon	1.215	1.5	0.30952	0.49825	0.02538	1.21598	0.03059	0.068639	0.069053	0.0032879	0.315	40.2682581453634	0.9304	0.83333	0
594	AC_010	Inward	NW	5.43	AgedCon	1.275	2	0.22626	0.40312	0.05276	1.63189	0.015146	0.060076	0.11566	0.00063541	0.315	43.192052631579	0.77831	0.60753	0.5
595	AC_010	OutWard	N	5.43	AgedCon	1.215	1	0.35843	0.4325	0.01568	0.69645	0.022283	0.048665	0.085775	0.0049497	0.315	35.8902330827068	0.83346	1	0.5
596	AC_010	Inward	N	5.43	AgedCon	1.32	2.5	0.28409	0.43333	0.04958	0.698041	0.011606	0.05158	0.071887	0.0037328	0.3	38.3291604010025	0.84553	0.60227	1
597	AC_010	OutWard	NE	5.43	AgedCon	1.065	1	0.281	0.40025	0.01312	0.372033	0.017547	0.071723	0.039429	0.0038827	0.405	34.5610476190476	0.77478	1	0
598	AC_010	Inward	NE	5.43	AgedCon	1.05	1	0.32381	0.41816	0.01335	0.551524	0.015223	0.055162	0.028008	0.0069905	0.27	38.5314060150376	0.80608	1	0.5
599	AC_010	OutWard	E	5.43	AgedCon	1.62	2	0.3065	0.34787	0.06012	2.31246	0.021528	0.046757	0.10462	0.0030736	0.285	34.2856466165414	0.64416	0.71032	1
600	AC_010	Inward	E	5.43	AgedCon	1.23	2	0.28321	0.50298	0.07584	0.558615	0.026248	0.049475	0.056967	0.0060026	0.315	43.2280802005013	0.89783	0.61292	1
601	YC_011	OutWard	W	3.80	YoungCon	0.885	1.5	0.31925	0.3819	0.05605	0.497261	0.0077253	0.036356	0.047551	0.00057259	0.165	41.2985513784461	0.7034	0.85366	1
602	YC_011	Inward	W	3.80	YoungCon	0.885	2	0.30795	0.50225	0.0843	2.76511	0.022072	0.024747	0.091953	0.0010856	0.15	48.7070601503759	0.90548	0.64033	1
603	YC_011	OutWard	NW	3.80	YoungCon	0.855	1.5	0.34748	0.4573	0.05886	1.55749	0.022333	0.067675	0.11638	0.00098379	0.15	42.440015037594	0.82557	0.81034	0
604	YC_011	Inward	NW	3.80	YoungCon	0.78	1	0.38531	0.45532	0.03986	1.71725	0.013548	0.030372	0.091249	0.00081998	0.15	45.6177368421053	0.84683	1	0
605	YC_011	OutWard	N	3.80	YoungCon	0.81	1	0.38462	0.42291	0.03955	0.897433	0.0099804	0.048009	0.096928	0.0019939	0.18	37.9487568922306	0.78616	1	1
606	YC_011	Inward	N	3.80	YoungCon	0.765	1	0.49008	0.58219	0.03125	1.31436	0.025478	0.049857	0.028648	0.0074481	0.165	43.1301553884712	0.88333	1	1
607	YC_011	OutWard	NE	3.80	YoungCon	1.08	1	0.26584	0.38062	0.02158	0.81371	0.012492	0.063083	0.16285	0.00033351	0.18	36.8695062656642	0.64864	1	1
608	YC_011	Inward	NE	3.80	YoungCon	0.75	1	0.4881	0.5012	0.04395	1.04158	0.019709	0.04041	0.066872	0.0093068	0.15	40.7071904761905	0.92161	1	0.5
609	YC_011	OutWard	E	3.80	YoungCon	0.915	1.5	0.31108	0.38338	0.11647	1.73179	0.021796	0.071515	0.16529	0.0087586	0.21	36.7881929824561	0.70315	0.79545	0.5
610	YC_011	Inward	E	3.80	YoungCon	0.915	1.5	0.36039	0.46313	0.1078	3.3229	0.020011	0.021778	0.075137	0.0054538	0.165	45.1754135338346	0.84955	0.81818	1
611	YC_011	OutWard	W	5.43	YoungCon	1.125	2.5	0.26908	0.47914	0.03438	1.64802	0.018467	0.087959	0.13287	0.00013635	0.195	43.7020025062657	0.91256	0.63824	1
612	YC_011	Inward	W	5.43	YoungCon	0.885	2	0.28975	0.47853	0.05648	1.26228	0.017574	0.057634	0.050126	0.00050434	0.21	52.0033007518797	0.89725	0.61175	1
613	YC_011	OutWard	NW	5.43	YoungCon	0.825	1	0.32796	0.42218	0.01725	0.62413	0.006278	0.051251	0.019595	0.0052137	0.18	46.6420501253133	0.80987	1	0.5
614	YC_011	Inward	NW	5.43	YoungCon	0.96	2	0.3	0.45681	0.04917	1.61173	0.023271	0.03244	0.035931	0.00019433	0.165	47.8834887218045	0.89252	0.65942	1
615	YC_011	OutWard	N	5.43	YoungCon	1.08	1.5	0.27778	0.43499	0.02106	0.74572	0.027365	0.042902	0.0366	0.003917	0.18	42.5054686716792	0.84711	0.86364	0.5
616	YC_011	Inward	N	5.43	YoungCon	1.065	2	0.30357	0.51239	0.02272	1.02948	0.0094019	0.019773	0.020706	0.00011105	0.18	47.474671679198	0.94971	0.70437	0.5
617	YC_011	OutWard	NE	5.43	YoungCon	0.975	1	0.30415	0.39289	0.01413	0.762218	0.014512	0.037715	0.1192	0.0012938	0.21	40.2349949874687	0.76675	1	1
618	YC_011	Inward	NE	5.43	YoungCon	0.855	1.5	0.39394	0.50262	0.02245	0.620623	0.033472	0.052735	0.026824	0.0051619	0.18	46.8519674185464	0.91959	0.83333	1
619	YC_011	OutWard	E	5.43	YoungCon	0.9	1	0.25952	0.35793	0.01503	0.420194	0.0095359	0.068574	0.11766	0.00091205	0.21	45.7641854636591	0.68279	1	0.5
620	YC_011	Inward	E	5.43	YoungCon	1.065	2.5	0.30188	0.47978	0.0524	2.2229	0.016148	0.04815	0.036421	0.00031973	0.165	50.6026115288221	0.90662	0.59127	1
621	SP_011	OutWard	W	3.80	Patient	2.6695	7	0.13825	0.093189	0.79249	23.9067	0.14814	0.11571	0.29796	0.0097576	0.256	11.0923052631579	0.13044	0.2356	0
622	SP_011	Inward	W	3.80	Patient	1.845	5.5	0.20697	0.24262	0.7283	6.73554	0.026234	0.1116	0.11863	0.0091482	0.405	13.4244568922306	0.40858	0.23338	0
623	SP_011	OutWard	NW	3.80	Patient	1.4835	3	0.38372	0.29469	0.51383	3.38252	0.045183	0.14426	0.19171	0.036495	0.255	21.7184771929825	0.51752	0.496	0
624	SP_011	Inward	NW	3.80	Patient	1.8305	4.5	0.19556	0.27659	0.51209	1.74619	0.030416	0.094763	0.26287	0.011397	0.345	19.5535959899749	0.48807	0.34182	1
625	SP_011	OutWard	N	3.80	Patient	1.6955	4.5	0.25617	0.20973	0.6163	2.9469	0.19082	0.1908	0.31852	0.0039647	0.3745	17.1124436090226	0.34503	0.36313	0.5
626	SP_011	Inward	N	3.80	Patient	1.8455	3.5	0.26837	0.25982	0.63451	1.24163	0.011671	0.18764	0.10014	0.015317	0.179	15.6385561403509	0.44599	0.31346	1
627	SP_011	OutWard	NE	3.80	Patient	1.9205	6.5	0.25825	0.24699	0.65814	6.22332	0.042853	0.19301	0.043389	0.014029	0.3295	15.380228320802	0.3827	0.29721	0.5
628	SP_011	Inward	NE	3.80	Patient	1.6805	4	0.23037	0.21783	0.60449	8.62389	0.013725	0.090238	0.31186	0.050114	0.3315	19.046243358396	0.36373	0.31424	0.5
629	SP_011	OutWard	E	3.80	Patient	1.92	5.5	0.17228	0.11764	0.77158	2.64759	0.067384	0.16524	0.18392	0.018443	0.5855	13.1712944862155	0.17105	0.24547	-0.5
630	SP_011	Inward	E	3.80	Patient	1.89	5.5	0.24719	0.27018	0.63274	14.9005	0.18557	0.18314	0.039024	0.01961	0.3135	14.5283390977444	0.48167	0.30392	0
631	SP_011	OutWard	W	5.43	Patient	3.585	10.5	0.087761	0.056495	0.921963	11.9067	0.040262	0.099911	0.16006	0.0030165	0.314	5.50302255639098	0.097113	0.11969	1
632	SP_011	Inward	W	5.43	Patient	2.596	8	0.14618	0.22532	0.62932	8.33367	0.060406	0.1744	0.10426	0.006884	0.3285	17.9628972431078	0.42812	0.19836	1
633	SP_011	OutWard	NW	5.43	Patient	2.191	6	0.18675	0.1812	0.67154	1.64156	0.098665	0.088248	0.17922	0.0085058	0.225	12.713286716792	0.34133	0.26188	0
634	SP_011	Inward	NW	5.43	Patient	3.001	9.5	0.17577	0.24033	0.6296	1.519	0.017377	0.058543	0.37256	0.006187	0.2995	17.1578067669173	0.46204	0.23959	1.5
635	SP_011	OutWard	N	5.43	Patient	2.161	4	0.29957	0.30337	0.6014	3.12328	0.030428	0.19215	0.27076	0.0033905	0.3	14.1316285714286	0.53955	0.31296	1
636	SP_011	Inward	N	5.43	Patient	2.8045	9.5	0.18187	0.21192	0.64336	1.67466	0.019	0.1024	0.10269	0.005338	0.3155	16.1262939849624	0.38663	0.24573	1.5
637	SP_011	OutWard	NE	5.43	Patient	2.43	6	0.22648	0.17123	0.76131	10.51	0.29104	0.31892	0.034171	0.0052857	0.2395	12.6691273182957	0.32047	0.24027	0.5
638	SP_011	Inward	NE	5.43	Patient	2.7165	7	0.19113	0.20678	0.74548	2.80795	0.031496	0.062173	0.16631	0.0031163	0.27	12.1107127819549	0.39413	0.20547	1
639	SP_011	OutWard	E	5.43	Patient	2.385	6	0.137	0.1822	0.65503	1.48165	0.016023	0.25061	0.30245	0.01486	0.421	14.2534197994987	0.33874	0.22795	0.5
640	SP_011	Inward	E	5.43	Patient	2.114	5.5	0.20627	0.27214	0.45959	3.96806	0.015443	0.1149	0.19985	0.0064472	0.331	18.506786716792	0.52512	0.31971	2.5
641	AC_011	OutWard	W	3.80	AgedCon	1.11	1	0.34425	0.46624	0.0522899999999999	0.436849	0.012575	0.074687	0.096718	0.020325	0.255	32.8421904761905	0.85836	1	1
642	AC_011	Inward	W	3.80	AgedCon	1.005	1	0.28342	0.42875	0.02894	0.821064	0.0046369	0.054427	0.072978	0.0018881	0.225	45.606656641604	0.79236	1	0.5
643	AC_011	OutWard	NW	3.80	AgedCon	1.035	2	0.27773	0.41315	0.0565099999999999	1.76292	0.021476	0.035107	0.14921	0.0053809	0.27	40.9553408521303	0.7573	0.82558	1
644	AC_011	Inward	NW	3.80	AgedCon	0.795	1	0.37857	0.46138	0.04315	1.03227	0.013223	0.075927	0.098495	0.02712	0.24	40.989343358396	0.85762	1	0
645	AC_011	OutWard	N	3.80	AgedCon	0.93	1	0.39718	0.4706	0.02371	0.754456	0.012274	0.070861	0.083608	0.0030138	0.27	38.7475864661654	0.84273	1	0
646	AC_011	Inward	N	3.80	AgedCon	0.915	1	0.3729	0.45965	0.02038	0.221983	0.01358	0.034423	0.11652	0.0031271	0.24	37.7518771929825	0.84477	1	0
647	AC_011	OutWard	NE	3.80	AgedCon	1.17	1	0.35334	0.39521	0.02873	1.61142	0.015962	0.027309	0.1296	0.0028989	0.255	33.9137944862155	0.73319	1	1
648	AC_011	Inward	NE	3.80	AgedCon	0.915	1	0.39355	0.51609	0.03139	0.840009	0.0050954	0.065627	0.070921	0.0047392	0.255	37.7834937343358	0.89225	1	1
649	AC_011	OutWard	E	3.80	AgedCon	1.275	1.5	0.27563	0.40361	0.05065	0.292145	0.016709	0.11219	0.19373	0.019636	0.285	31.0991879699248	0.74407	0.81818	1
650	AC_011	Inward	E	3.80	AgedCon	1.065	1	0.33716	0.51396	0.03462	0.286551	0.017368	0.097802	0.039569	0.0081634	0.24	32.9481979949875	0.83299	1	1
651	AC_011	OutWard	W	5.43	AgedCon	1.17	1	0.35968	0.44306	0.01555	0.155979	0.045922	0.11315	0.13146	0.0076761	0.24	31.1878746867168	0.81988	1	0.5
652	AC_011	Inward	W	5.43	AgedCon	1.035	1	0.3049	0.41266	0.01447	0.524987	0.011624	0.062758	0.038584	0.0029248	0.225	42.6606040100251	0.80512	1	1
653	AC_011	OutWard	NW	5.43	AgedCon	1.215	2	0.25915	0.38103	0.02679	1.15925	0.027164	0.060046	0.10842	0.0058078	0.24	38.719626566416	0.73916	0.76829	1
654	AC_011	Inward	NW	5.43	AgedCon	1.095	1.5	0.24037	0.36614	0.01932	0.186903	0.02098	0.10232	0.12457	0.0032169	0.225	41.9917944862155	0.71023	0.85714	0.5
655	AC_011	OutWard	N	5.43	AgedCon	1.155	1	0.36111	0.46345	0.00814999999999999	0.283622	0.012005	0.059915	0.13955	0.00093141	0.255	33.6393759398496	0.85048	1	1
656	AC_011	Inward	N	5.43	AgedCon	1.2	1.5	0.37461	0.47024	0.02008	0.409398	0.014248	0.034029	0.047898	0.00522	0.24	32.7017518796993	0.91629	0.90244	0.5
657	AC_011	OutWard	NE	5.43	AgedCon	1.425	2	0.31958	0.40348	0.02366	1.24684	0.018137	0.043352	0.16625	0.0072316	0.225	29.0665388471178	0.78977	0.77631	1
658	AC_011	Inward	NE	5.43	AgedCon	1.26	1.5	0.31837	0.41125	0.02147	0.422083	0.018955	0.031052	0.059618	0.0065186	0.24	33.6437944862155	0.79907	0.87755	1
659	AC_011	OutWard	E	5.43	AgedCon	1.275	1.5	0.31763	0.42067	0.01569	0.472749	0.018365	0.047275	0.1391	0.0070606	0.255	31.5736165413534	0.81804	0.86585	1
660	AC_011	Inward	E	5.43	AgedCon	1.23	1	0.31783	0.47133	0.0107	0.42107	0.014918	0.085018	0.066732	0.0035546	0.27	32.6856140350877	0.83502	1	0.5
661	YC_012	OutWard	W	3.80	YoungCon	0.855	2	0.32796	0.42873	0.14115	1.462	0.022834	0.051237	0.047767	0.0087369	0.21	52.689626566416	0.78527	0.62963	1
662	YC_012	Inward	W	3.80	YoungCon	0.705	2	0.36905	0.5858	0.04625	1.2413	0.05218	0.049364	0.03207	0.0068871	0.135	52.5752882205514	0.89909	0.68025	0
663	YC_012	OutWard	NW	3.80	YoungCon	0.765	1.5	0.31385	0.43249	0.05362	1.93834	0.017265	0.095976	0.13081	0.0028043	0.24	57.566671679198	0.77253	0.875	0
664	YC_012	Inward	NW	3.80	YoungCon	0.825	2	0.34549	0.46971	0.10958	0.11517	0.032743	0.049025	0.021397	0.00012205	0.195	50.6925213032581	0.86797	0.65367	0.5
665	YC_012	OutWard	N	3.80	YoungCon	0.825	1	0.34036	0.45964	0.02156	0.475815	0.017303	0.029559	0.099111	0.00092736	0.195	49.0580175438596	0.85594	1	1
666	YC_012	Inward	N	3.80	YoungCon	0.855	1.5	0.35095	0.49611	0.03247	1.38961	0.022277	0.058468	0.054162	0.0018918	0.165	50.5763934837093	0.90965	0.83871	0.5
667	YC_012	OutWard	NE	3.80	YoungCon	0.975	1.5	0.26951	0.38073	0.05223	1.07011	0.011111	0.042216	0.15595	0.001247	0.255	43.2539122807018	0.70323	0.86842	0.5
668	YC_012	Inward	NE	3.80	YoungCon	0.84	1.5	0.33974	0.47421	0.0298	1.09534	0.021225	0.069923	0.065543	0.00018207	0.195	49.5179172932331	0.87677	0.86667	0
669	YC_012	OutWard	E	3.80	YoungCon	0.825	2	0.2963	0.43472	0.06518	0.0638211	0.010506	0.050666	0.082239	0.000169	0.255	49.1607994987469	0.76739	0.67262	0.5
670	YC_012	Inward	E	3.80	YoungCon	0.84	1.5	0.37422	0.56641	0.03226	0.97458	0.018063	0.022942	0.048043	0.0012646	0.225	58.5694862155389	0.87605	0.85714	0
671	YC_012	OutWard	W	5.43	YoungCon	1.02	2	0.28686	0.39075	0.08946	0.447221	0.022693	0.06802	0.094041	0.010572	0.18	53.125619047619	0.76198	0.68175	1
672	YC_012	Inward	W	5.43	YoungCon	0.9	2.5	0.27506	0.51708	0.02796	1.41519	0.024742	0.099493	0.11327	0.00025135	0.24	56.4370250626566	0.84556	0.51981	1
673	YC_012	OutWard	NW	5.43	YoungCon	0.84	2	0.29101	0.4705	0.06604	0.822743	0.028375	0.10442	0.15747	0.0049013	0.195	55.9384711779449	0.76559	0.67196	1.5
674	YC_012	Inward	NW	5.43	YoungCon	0.945	2	0.30706	0.46634	0.07287	0.978543	0.019323	0.015065	0.056873	0.0066147	0.195	52.5738721804511	0.9066	0.64698	1.5
675	YC_012	OutWard	N	5.43	YoungCon	1.095	2	0.26667	0.44374	0.08606	0.48873	0.011455	0.048908	0.12272	0.0034078	0.195	50.6517744360902	0.86734	0.58598	1
676	YC_012	Inward	N	5.43	YoungCon	0.885	1.5	0.32373	0.44306	0.03584	0.746805	0.013659	0.014915	0.058825	0.0070232	0.165	52.6114310776942	0.86287	0.82258	1
677	YC_012	OutWard	NE	5.43	YoungCon	0.915	1.5	0.30517	0.38745	0.02961	1.48719	0.042009	0.057884	0.19737	0.0036351	0.225	42.5268621553885	0.75339	0.87143	0.5
678	YC_012	Inward	NE	5.43	YoungCon	0.9	2.5	0.32796	0.48351	0.0245	0.754486	0.021481	0.092394	0.06925	0.0015459	0.195	47.4978947368421	0.84534	0.67134	1
679	YC_012	OutWard	E	5.43	YoungCon	0.885	1	0.27126	0.36805	0.00932999999999995	0.219821	0.022413	0.08609	0.13137	0.0059036	0.24	49.9787894736842	0.70934	1	0
680	YC_012	Inward	E	5.43	YoungCon	1.14	3	0.2625	0.52693	0.0821	2.43885	0.024646	0.034606	0.1071	0.0051433	0.15	51.1895338345865	0.89851	0.55038	1
681	SP_012	OutWard	W	3.80	Patient	2.8965	7	0.16118	0.20948	0.62133	9.23396	0.06894	0.05996	0.36646	0.010427	0.509	13.8396408521303	0.3566	0.2391	3
682	SP_012	Inward	W	3.80	Patient	1.964	3.5	0.16176	0.22109	0.4674	7.17942	0.029002	0.088247	0.18324	0.0078968	0.3	19.1242501253133	0.38097	0.2994	0.5
683	SP_012	OutWard	NW	3.80	Patient	3.481	9	0.12698	0.14532	0.78874	7.60582	0.074073	0.13517	0.33534	0.016663	0.4195	12.0224045112782	0.21268	0.14759	0.5
684	SP_012	Inward	NW	3.80	Patient	1.935	7	0.25808	0.27059	0.64667	11.7002	0.012092	0.11783	0.13241	0.010431	0.3165	15.1474909774436	0.45956	0.29573	0.5
685	SP_012	OutWard	N	3.80	Patient	3.794	12.5	0.03522	0.080146	0.84208	42.2435	0.37164	0.018668	0.28795	0.020497	0.346	11.7599370927318	0.090476	0.074038	1
686	SP_012	Inward	N	3.80	Patient	2.3095	7.5	0.20287	0.17519	0.80274	6.54454	0.038016	0.23334	0.1709	0.019806	0.253	10.787137593985	0.26965	0.22635	0
687	SP_012	OutWard	NE	3.80	Patient	3.5395	9.5	0.085562	0.14835	0.76288	30.4893	0.19058	0.08763	0.1254	0.016366	0.331	14.3946862155388	0.22261	0.13994	1
688	SP_012	Inward	NE	3.80	Patient	2.101	6.5	0.22992	0.24388	0.55267	10.5683	0.056426	0.090921	0.21489	0.014252	0.24	14.2235839598997	0.40829	0.35701	-0.5
689	SP_012	OutWard	E	3.80	Patient	3.36	7.5	0.11392	0.15425	0.65744	5.93302	0.22917	0.037073	0.32683	0.019911	0.36	13.6947696741855	0.24724	0.19005	1
690	SP_012	Inward	E	3.80	Patient	1.89	5	0.15831	0.2215	0.66187	5.15419	0.019339	0.12498	0.34977	0.029299	0.4195	16.8509012531328	0.36757	0.26329	0.5
691	SP_012	OutWard	W	5.43	Patient	3.629	8	0.093279	0.12618	0.68338	5.64647	0.013776	0.14943	0.23471	0.012103	0.4965	12.0819363408521	0.23063	0.19023	1.5
692	SP_012	Inward	W	5.43	Patient	2.2645	5	0.15853	0.19346	0.63262	20.6815	0.027335	0.092551	0.2056	0.0063978	0.255	17.4724769423559	0.37738	0.24393	1
693	SP_012	OutWard	NW	5.43	Patient	3.96	14	0.073297	0.061941	0.86794	14.5159	0.47579	0.10802	0.31747	0.0020867	0.4345	6.92910275689223	0.099931	0.12264	1.5
694	SP_012	Inward	NW	5.43	Patient	3.2395	7.5	0.11466	0.11148	0.8394	18.2673	0.010196	0.16561	0.11366	0.0048062	0.2555	9.65133233082707	0.20592	0.12384	0
695	SP_012	OutWard	N	5.43	Patient	5.309	14	0.050652	0.066665	0.85464	32.0907	0.0037867	0.14812	0.43512	0.016653	0.465	8.01476892230576	0.1117	0.080399	4
696	SP_012	Inward	N	5.43	Patient	3.8695	12	0.14869	0.19516	0.78663	6.916	0.01686	0.11006	0.12138	0.0072233	0.1795	10.1883626566416	0.36894	0.1634	0.5
697	SP_012	OutWard	NE	5.43	Patient	5.715	14.5	0.043102	0.12677	0.79492	29.4718	0.011425	0.14135	0.14487	0.003018	0.347	12.7321639097744	0.20206	0.087088	3.5
698	SP_012	Inward	NE	5.43	Patient	2.8505	8	0.15941	0.16166	0.70397	10.5528	0.013747	0.17683	0.26837	0.0084178	0.195	11.784973433584	0.29479	0.22951	0
699	SP_012	OutWard	E	5.43	Patient	3.9755	8.5	0.074854	0.16088	0.70794	3.39136	0.021657	0.10546	0.1594	0.011733	0.3595	15.5366308270677	0.3095	0.11517	3.5
700	SP_012	Inward	E	5.43	Patient	3.4785	8	0.10899	0.20306	0.645	7.29018	0.019426	0.1096	0.23011	0.0091797	0.405	15.0911022556391	0.38209	0.15831	2.5
701	AC_012	OutWard	W	3.80	AgedCon	0.63	1.5	0.35812	0.48204	0.02624	0.524589	0.02436	0.070483	0.1319	0.0079709	0.225	56.4744135338346	0.87809	0.86842	-1
702	AC_012	Inward	W	3.80	AgedCon	0.435	1	0.44505	0.484	0.04628	1.58702	0.013706	0.011073	0.042778	0.011473	0.195	58.3404912280702	0.88602	1	0.5
703	AC_012	OutWard	NW	3.80	AgedCon	0.825	2	0.25543	0.51705	0.09871	3.28324	0.021658	0.071752	0.085775	0.0022146	0.27	62.0275689223058	0.86208	0.53261	0.5
704	AC_012	Inward	NW	3.80	AgedCon	0.69	1.5	0.30435	0.48953	0.03714	1.19425	0.019226	0.06296	0.038308	0.0097172	0.195	59.3421679197995	0.90243	0.82609	0.5
705	AC_012	OutWard	N	3.80	AgedCon	0.615	1	0.3877	0.47079	0.04517	0.624985	0.018715	0.029268	0.043166	0.015048	0.225	50.7735614035088	0.87509	1	-0.5
706	AC_012	Inward	N	3.80	AgedCon	0.75	1.5	0.28	0.51321	0.06818	1.67377	0.017881	0.045469	0.052817	0.012207	0.225	59.1488295739348	0.90139	0.76	0.5
707	AC_012	OutWard	NE	3.80	AgedCon	0.72	1	0.33217	0.43184	0.01733	0.310432	0.012793	0.042428	0.079646	0.010042	0.195	47.649709273183	0.78818	1	0
708	AC_012	Inward	NE	3.80	AgedCon	0.72	1	0.29371	0.52013	0.02281	0.733562	0.016382	0.068349	0.079302	0.0066703	0.15	51.9468546365915	0.90726	1	0
709	AC_012	OutWard	E	3.80	AgedCon	0.795	1.5	0.27043	0.48012	0.04758	1.39389	0.02463	0.087355	0.12637	0.0065933	0.21	51.9451604010025	0.85197	0.8	0
710	AC_012	Inward	E	3.80	AgedCon	0.795	2	0.28376	0.48545	0.06507	1.86937	0.019296	0.055606	0.11582	0.028814	0.21	52.0022756892231	0.86104	0.61382	0.5
711	AC_012	OutWard	W	5.43	AgedCon	0.945	3	0.24038	0.45822	0.02865	0.444646	0.028787	0.05457	0.048186	0.0051898	0.24	52.672694235589	0.87974	0.50855	0.5
712	AC_012	Inward	W	5.43	AgedCon	0.84	2	0.26786	0.46865	0.05742	1.22893	0.019119	0.031926	0.039961	0.0027853	0.195	57.7099824561404	0.91109	0.62175	0
713	AC_012	OutWard	NW	5.43	AgedCon	0.975	2.5	0.2318	0.47237	0.06375	1.87517	0.015821	0.077353	0.090493	0.0022611	0.27	58.5058170426065	0.81638	0.47414	0
714	AC_012	Inward	NW	5.43	AgedCon	0.675	2.5	0.32543	0.49438	0.03088	0.713781	0.031739	0.072099	0.039005	0.0092551	0.21	62.6296666666667	0.88701	0.6681	0
715	AC_012	OutWard	N	5.43	AgedCon	0.99	2	0.24147	0.46096	0.09385	2.66708	0.026749	0.036125	0.11245	0.0027026	0.225	52.8276240601504	0.88275	0.56952	0.5
716	AC_012	Inward	N	5.43	AgedCon	0.75	1.5	0.29167	0.46791	0.02469	0.502589	0.017463	0.029894	0.04226	0.0051101	0.195	55.0332756892231	0.87316	0.84722	0
717	AC_012	OutWard	NE	5.43	AgedCon	1.035	2	0.26263	0.48375	0.03984	0.446591	0.020285	0.016667	0.052652	0.0032251	0.225	47.3218746867168	0.9191	0.58207	0.5
718	AC_012	Inward	NE	5.43	AgedCon	1.02	2	0.2075	0.44289	0.03977	1.74133	0.021281	0.015579	0.065053	0.0031433	0.21	51.9804461152882	0.86336	0.56712	0.5
719	AC_012	OutWard	E	5.43	AgedCon	1.14	2	0.20641	0.40047	0.16677	1.2765	0.018621	0.055227	0.040522	0.014255	0.255	44.5490551378446	0.78147	0.43604	0
720	AC_012	Inward	E	5.43	AgedCon	0.945	2	0.22581	0.47333	0.0673899999999999	1.8812	0.030868	0.049465	0.063814	0.0021121	0.225	58.4521779448622	0.87612	0.53748	0
721	YC_013	OutWard	W	3.80	YoungCon	0.825	2.5	0.27249	0.50671	0.09072	2.96371	0.016717	0.13428	0.19377	0.0034304	0.27	52.7693308270677	0.88599	0.49074	1
722	YC_013	Inward	W	3.80	YoungCon	0.75	2	0.30602	0.47641	0.14789	2.26888	0.026772	0.039902	0.12399	0.0029536	0.24	53.7883082706767	0.88251	0.61204	0.5
723	YC_013	OutWard	NW	3.80	YoungCon	0.75	1.5	0.30952	0.43914	0.11239	1.83764	0.019982	0.071765	0.13668	0.0051645	0.285	49.4304711779449	0.79591	0.78846	0
724	YC_013	Inward	NW	3.80	YoungCon	0.9	2	0.26599	0.39719	0.16875	1.51231	0.0080975	0.050947	0.097811	0.0030206	0.285	47.481649122807	0.73031	0.57407	0.5
725	YC_013	OutWard	N	3.80	YoungCon	0.855	1.5	0.30902	0.43061	0.05618	1.56109	0.022171	0.028527	0.044342	0.00046678	0.225	49.343313283208	0.80355	0.82813	0
726	YC_013	Inward	N	3.80	YoungCon	0.69	1	0.39205	0.51128	0.03827	0.985509	0.012017	0.059476	0.0609	0.0053332	0.225	53.1321804511278	0.93364	1	0.5
727	YC_013	OutWard	NE	3.80	YoungCon	0.7795	1.5	0.30769	0.41652	0.10704	1.74859	0.018262	0.031605	0.066047	0.0011121	0.2405	47.2066666666667	0.77563	0.7963	0
728	YC_013	Inward	NE	3.80	YoungCon	0.795	1.5	0.33908	0.55317	0.05433	1.164	0.020302	0.10437	0.14069	0.0026752	0.255	55.439015037594	0.86885	0.8125	1
729	YC_013	OutWard	E	3.80	YoungCon	0.825	2	0.23611	0.36156	0.25772	5.35682	0.01249	0.052597	0.087941	0.0011766	0.285	50.7833007518797	0.63973	0.50926	0
730	YC_013	Inward	E	3.80	YoungCon	1.02	2	0.25	0.53908	0.13766	1.73423	0.023048	0.094251	0.13149	0.0024478	0.33	66.0595388471178	0.82216	0.50794	0.5
731	YC_013	OutWard	W	5.43	YoungCon	1.125	3	0.2	0.38256	0.17378	0.719976	0.028049	0.076391	0.093272	0.0009628	0.255	56.3806817042607	0.74473	0.42679	1
732	YC_013	Inward	W	5.43	YoungCon	1.32	3	0.19306	0.44534	0.02804	1.15318	0.013049	0.05292	0.074812	0.00080448	0.255	55.933977443609	0.86748	0.60952	1.5
733	YC_013	OutWard	NW	5.43	YoungCon	1.005	2.5	0.2004	0.40474	0.10544	2.34801	0.024268	0.062954	0.10168	0.0057412	0.255	57.8104786967419	0.78768	0.44194	1
734	YC_013	Inward	NW	5.43	YoungCon	0.885	2	0.28802	0.46354	0.05967	0.703276	0.021222	0.057738	0.093696	0.0012745	0.18	49.7554085213033	0.90042	0.59203	0.5
735	YC_013	OutWard	N	5.43	YoungCon	1.02	1.5	0.27914	0.4687	0.02059	0.752944	0.019797	0.038959	0.037462	0.00037625	0.255	52.6514761904762	0.89364	0.82258	1.5
736	YC_013	Inward	N	5.43	YoungCon	0.75	1.5	0.32051	0.47329	0.0210399999999999	1.09482	0.01871	0.013046	0.029469	0.0026035	0.255	54.2438721804511	0.91639	0.93038	1
737	YC_013	OutWard	NE	5.43	YoungCon	1.29	2.5	0.22093	0.43513	0.03579	0.882318	0.02429	0.083284	0.1065	0.0060733	0.255	52.7981729323308	0.83481	0.60465	1.5
738	YC_013	Inward	NE	5.43	YoungCon	0.765	2	0.39154	0.50797	0.0256999999999999	0.829844	0.054795	0.028964	0.042232	0.0071381	0.255	52.5820426065163	0.9374	0.78385	0.5
739	YC_013	OutWard	E	5.43	YoungCon	0.975	2.5	0.2318	0.34849	0.21322	1.59525	0.024586	0.049543	0.10999	0.0025481	0.255	48.1900125313283	0.67034	0.4842	0
740	YC_013	Inward	E	5.43	YoungCon	1.065	2.5	0.27195	0.4467	0.07311	1.25223	0.028591	0.076622	0.14026	0.0019451	0.24	59.9272130325815	0.85391	0.5439	0.5
741	SP_013	OutWard	W	3.80	Patient	1.4545	3.5	0.32072	0.4614	0.42789	3.93033	0.21378	0.20696	0.11924	0.01122	0.2255	22.5224874686717	0.59338	0.37787	-0.5
742	SP_013	Inward	W	3.80	Patient	1.0355	1	0.35206	0.3927	0.02305	0.474344	0.0077784	0.023818	0.15026	0.0064813	0.2405	30.5872531328321	0.72807	1	1
743	SP_013	OutWard	NW	3.80	Patient	1.1715	2.5	0.29779	0.40619	0.25171	1.75097	0.010487	0.07264	0.18675	0.0084249	0.239	26.9692105263158	0.74671	0.65908	1
744	SP_013	Inward	NW	3.80	Patient	1.036	1.5	0.34079	0.37509	0.04761	0.193759	0.011379	0.036099	0.1068	0.0033419	0.2255	29.4355313283208	0.6858	0.84586	1
745	SP_013	OutWard	N	3.80	Patient	1.3495	4	0.24038	0.26729	0.64988	3.71355	0.017796	0.16586	0.1045	0.0083406	0.2715	18.4778779448622	0.46939	0.29976	0.5
746	SP_013	Inward	N	3.80	Patient	1.066	2	0.44909	0.36491	0.49725	3.04914	0.011471	0.047299	0.059088	0.011192	0.2385	25.0973408521303	0.65598	0.53443	0
747	SP_013	OutWard	NE	3.80	Patient	1.514	4	0.27517	0.32283	0.60692	2.68194	0.022483	0.13856	0.095038	0.0048275	0.2265	20.1649012531328	0.58903	0.32264	1
748	SP_013	Inward	NE	3.80	Patient	1.3795	3	0.29357	0.34408	0.60037	3.54399	0.012048	0.07021	0.058192	0.0032301	0.285	23.2427573934837	0.61204	0.39146	0.5
749	SP_013	OutWard	E	3.80	Patient	1.6485	5	0.23774	0.3094	0.59801	2.58222	0.011812	0.067512	0.27986	0.0025806	0.3915	18.2500095238095	0.55324	0.2948	1
750	SP_013	Inward	E	3.80	Patient	0.929	1	0.40258	0.4628	0.04553	1.77087	0.0354	0.023972	0.06251	0.010987	0.3305	27.0413884711779	0.80369	1	0
751	SP_013	OutWard	W	5.43	Patient	1.6505	4.5	0.19776	0.16898	0.75671	11.7218	0.091749	0.1012	0.073616	0.0073075	0.2405	17.4017619047619	0.32606	0.26748	0
752	SP_013	Inward	W	5.43	Patient	1.2605	2	0.26177	0.34801	0.09875	1.45436	0.022864	0.0817	0.174	0.0059037	0.196	27.2128195488722	0.67806	0.68943	1
753	SP_013	OutWard	NW	5.43	Patient	1.8005	5	0.1978	0.21927	0.59734	3.53891	0.10994	0.098236	0.13393	0.010951	0.209	23.2774463659148	0.41743	0.2683	0.5
754	SP_013	Inward	NW	5.43	Patient	1.5305	4.5	0.24375	0.32338	0.58617	1.04866	0.01108	0.08513	0.039899	0.0048023	0.24	24.3226060150376	0.62643	0.27545	1
755	SP_013	OutWard	N	5.43	Patient	1.7695	4.5	0.1859	0.15999	0.74005	5.63099	0.012907	0.090344	0.089286	0.0058382	0.239	14.8809646616541	0.29855	0.24287	0.5
756	SP_013	Inward	N	5.43	Patient	1.7705	4	0.28859	0.35236	0.60642	8.41606	0.023564	0.15318	0.12727	0.0030652	0.18	23.4513453634085	0.65767	0.3153	1
757	SP_013	OutWard	NE	5.43	Patient	1.935	4	0.23199	0.35127	0.56241	1.99285	0.017568	0.1445	0.070227	0.0033921	0.2705	21.6776839598997	0.68094	0.2582	1
758	SP_013	Inward	NE	5.43	Patient	1.335	3.5	0.35427	0.31167	0.6412	7.86946	0.030021	0.085654	0.090986	0.0058409	0.1945	22.1875989974937	0.6076	0.38323	0
759	SP_013	OutWard	E	5.43	Patient	1.994	5	0.15789	0.18735	0.65063	2.67932	0.0081436	0.22034	0.085277	0.0029859	0.2405	17.3887428571429	0.35267	0.2358	0.5
760	SP_013	Inward	E	5.43	Patient	1.4105	2.5	0.29923	0.47153	0.04008	1.80981	0.018928	0.056586	0.1134	0.0050318	0.211	29.9619273182957	0.88245	0.67837	1.5
761	AC_013	OutWard	W	3.80	AgedCon	0.9	2	0.30543	0.45132	0.04181	0.337086	0.015456	0.070403	0.044893	0.021624	0.195	46.8432205513784	0.83518	0.68439	0
762	AC_013	Inward	W	3.80	AgedCon	1.14	2	0.21053	0.49685	0.06407	2.23581	0.042118	0.059781	0.118	0.0060602	0.15	51.9229949874687	0.88189	0.54419	0
763	AC_013	OutWard	NW	3.80	AgedCon	0.975	1.5	0.29406	0.4555	0.02647	1.10766	0.018588	0.036601	0.11064	0.007291	0.21	43.6319097744361	0.80069	0.875	1
764	AC_013	Inward	NW	3.80	AgedCon	1.02	2	0.27941	0.50997	0.073	1.54182	0.012759	0.03738	0.043847	0.0092393	0.18	51.141015037594	0.87005	0.63235	0.5
765	AC_013	OutWard	N	3.80	AgedCon	0.81	1.5	0.31907	0.55186	0.0575599999999999	2.34003	0.051616	0.065139	0.061005	0.017713	0.24	49.8767944862155	0.87586	0.80645	-0.5
766	AC_013	Inward	N	3.80	AgedCon	0.885	2	0.28877	0.43467	0.04664	2.18972	0.012082	0.049373	0.078435	0.0048924	0.195	45.0534411027569	0.7847	0.74826	0
767	AC_013	OutWard	NE	3.80	AgedCon	1.005	1.5	0.2744	0.48569	0.10118	2.92092	0.02533	0.13522	0.23888	0.040982	0.18	53.0878195488722	0.73009	0.72222	0
768	AC_013	Inward	NE	3.80	AgedCon	0.99	2	0.20526	0.4126	0.15908	5.90347	0.0074752	0.048059	0.10287	0.034342	0.18	48.5881528822055	0.75129	0.5431	1
769	AC_013	OutWard	E	3.80	AgedCon	1.11	3	0.17568	0.37769	0.20126	1.65006	0.012316	0.10968	0.20551	0.0031153	0.21	62.259694235589	0.69217	0.38667	0.5
770	AC_013	Inward	E	3.80	AgedCon	0.885	2	0.225	0.4864	0.08918	0.998629	0.032519	0.095005	0.15955	0.021352	0.21	58.8992882205514	0.84022	0.5619	0.5
771	AC_013	OutWard	W	5.43	AgedCon	0.975	1.5	0.26293	0.43835	0.02564	0.437858	0.0041024	0.037835	0.093948	0.0080682	0.21	47.5212807017544	0.84039	0.875	0
772	AC_013	Inward	W	5.43	AgedCon	1.23	3	0.21196	0.57629	0.12394	1.70541	0.014365	0.042832	0.039085	0.0035871	0.21	60.3944812030075	0.84105	0.44256	1
773	AC_013	OutWard	NW	5.43	AgedCon	0.84	1	0.33929	0.45418	0.0172	0.750891	0.014818	0.051292	0.04687	0.0078898	0.24	44.3155538847118	0.87992	1	1
774	AC_013	Inward	NW	5.43	AgedCon	1.005	2.5	0.24319	0.44366	0.04882	1.74169	0.024932	0.039853	0.054256	0.01317	0.21	51.8276741854637	0.8621	0.6039	0
775	AC_013	OutWard	N	5.43	AgedCon	1.11	2	0.21765	0.40601	0.0374100000000001	0.787551	0.0092968	0.076449	0.11148	0.010401	0.21	46.5366541353383	0.79075	0.65074	0.5
776	AC_013	Inward	N	5.43	AgedCon	1.125	3	0.17321	0.47634	0.06074	2.07025	0.017241	0.043494	0.080655	0.0048309	0.225	62.354656641604	0.92126	0.39821	1
777	AC_013	OutWard	NE	5.43	AgedCon	1.14	3	0.19737	0.44049	0.10289	1.38692	0.016005	0.023583	0.092489	0.0066954	0.195	53.1699724310777	0.84033	0.44737	0.5
778	AC_013	Inward	NE	5.43	AgedCon	0.975	2	0.21667	0.38687	0.09817	1.55527	0.014416	0.069622	0.071804	0.015845	0.21	52.3552932330827	0.74002	0.60769	1
779	AC_013	OutWard	E	5.43	AgedCon	1.35	3	0.15629	0.30329	0.15451	1.22226	0.026962	0.036805	0.074574	0.011242	0.225	39.1877218045113	0.58679	0.41453	0.5
780	AC_013	Inward	E	5.43	AgedCon	1.185	3	0.20256	0.47966	0.07746	1.80519	0.029381	0.056633	0.065914	0.0089513	0.24	57.8639448621554	0.89885	0.45701	0.5
781	YC_014	OutWard	W	3.80	YoungCon	1.065	2	0.29381	0.43241	0.09456	2.29163	0.016369	0.099049	0.10689	0.0049419	0.195	41.5638847117794	0.73157	0.71969	0
782	YC_014	Inward	W	3.80	YoungCon	1.065	2	0.36261	0.46185	0.08205	0.723602	0.031358	0.032021	0.063872	0.00072213	0.09	45.0820125313283	0.86809	0.66681	0
783	YC_014	OutWard	NW	3.80	YoungCon	0.87	1.5	0.33544	0.44776	0.11426	2.76234	0.020187	0.07278	0.12477	0.0026434	0.21	44.8166992481203	0.8293	0.79032	0.5
784	YC_014	Inward	NW	3.80	YoungCon	0.9	2	0.26667	0.41841	0.05868	1.68097	0.025961	0.059459	0.16193	0.0024306	0.225	49.8440651629073	0.77532	0.55119	1
785	YC_014	OutWard	N	3.80	YoungCon	0.9	2	0.31818	0.42319	0.09704	1.3639	0.02516	0.097939	0.14049	0.00064654	0.21	45.4926015037594	0.78328	0.65825	1
786	YC_014	Inward	N	3.80	YoungCon	0.9	2	0.32796	0.44695	0.07608	2.32384	0.014494	0.048352	0.07636	0.0045793	0.18	45.8488145363409	0.80814	0.73763	1.5
787	YC_014	OutWard	NE	3.80	YoungCon	1.14	2	0.27864	0.40064	0.11266	2.80292	0.013375	0.045157	0.077541	0.0006801	0.225	40.3601704260652	0.73682	0.63622	0.5
788	YC_014	Inward	NE	3.80	YoungCon	1.14	1.5	0.28802	0.44072	0.0683	1.76841	0.020568	0.053812	0.098956	0.0024433	0.18	48.0572857142857	0.80874	0.81111	1.5
789	YC_014	OutWard	E	3.80	YoungCon	1.23	2.5	0.26164	0.35521	0.26915	1.92573	0.010297	0.039404	0.044194	0.0075675	0.24	37.7920751879699	0.65032	0.47733	1
790	YC_014	Inward	E	3.80	YoungCon	0.885	1.5	0.33317	0.46508	0.05209	0.641296	0.034951	0.020766	0.088829	0.0039671	0.225	41.3172606516291	0.87017	0.83871	0
791	YC_014	OutWard	W	5.43	YoungCon	1.245	2.5	0.27922	0.40408	0.07358	0.624137	0.016894	0.18133	0.18646	0.006041	0.225	39.049664160401	0.66806	0.65668	1
792	YC_014	Inward	W	5.43	YoungCon	1.56	3	0.22469	0.37965	0.04054	0.703439	0.026064	0.049476	0.16322	0.001871	0.21	49.1706040100251	0.73822	0.51654	1
793	YC_014	OutWard	NW	5.43	YoungCon	1.26	3	0.21429	0.43155	0.12816	3.4741	0.02233	0.092126	0.11475	0.00068331	0.255	44.3142581453634	0.80774	0.38843	1.5
794	YC_014	Inward	NW	5.43	YoungCon	1.02	2.5	0.2355	0.40522	0.1094	2.12094	0.022733	0.065852	0.090675	0.011568	0.255	48.5731879699248	0.77185	0.54675	1.5
795	YC_014	OutWard	N	5.43	YoungCon	0.975	1.5	0.27751	0.40371	0.02955	0.441532	0.028831	0.089619	0.11551	0.0092279	0.255	46.9781754385965	0.78287	0.83824	0
796	YC_014	Inward	N	5.43	YoungCon	1.2	2.5	0.27304	0.52613	0.08374	3.30685	0.0096483	0.052773	0.089428	0.0014852	0.375	50.6462631578947	0.86119	0.55556	1
797	YC_014	OutWard	NE	5.43	YoungCon	1.425	3	0.23443	0.42759	0.12771	1.27339	0.018028	0.028891	0.11855	0.00031182	0.285	39.8941604010025	0.83598	0.43374	1.5
798	YC_014	Inward	NE	5.43	YoungCon	1.065	2	0.29584	0.4864	0.06125	2.56308	0.019857	0.033582	0.036324	0.00081669	0.21	50.673694235589	0.91217	0.5989	1.5
799	YC_014	OutWard	E	5.43	YoungCon	1.395	2.5	0.26907	0.37593	0.03507	1.62897	0.0086432	0.048764	0.16345	0.0017565	0.225	38.7537192982456	0.66142	0.64689	1.5
800	YC_014	Inward	E	5.43	YoungCon	1.23	2.5	0.2585	0.46347	0.0344100000000001	0.563126	0.044953	0.08667	0.1307	0.0079087	0.225	45.544679197995	0.88834	0.67492	1.5
801	SP_014	OutWard	W	3.80	Patient	2.19	4.5	0.16369	0.14748	0.78566	7.51848	0.34344	0.16849	0.10069	0.008731	0.165	11.0246468671679	0.22926	0.21132	-0.5
802	SP_014	Inward	W	3.80	Patient	1.815	3	0.34727	0.38215	0.40137	4.48076	0.051385	0.1466	0.20824	0.017801	0.09	14.1109012531328	0.68172	0.50613	0
803	SP_014	OutWard	NW	3.80	Patient	3.375	7.5	0.10825	0.14518	0.73263	14.8381	0.4257	0.14283	0.25849	0.017763	0.36	8.6843686716792	0.22077	0.19709	-0.5
804	SP_014	Inward	NW	3.80	Patient	2.325	5.5	0.21959	0.23661	0.68543	5.35922	0.35868	0.27056	0.24663	0.019164	0.105	8.64574887218045	0.39338	0.33273	0
805	SP_014	OutWard	N	3.80	Patient	4.185	10	0.10988	0.12153	0.81596	13.3286	0.21164	0.14919	0.25289	0.023619	0.21	5.37289323308271	0.18554	0.15802	-1
806	SP_014	Inward	N	3.80	Patient	2.79	6	0.15548	0.13003	0.86348	1.90889	0.45538	0.068775	0.11282	0.013677	0.18	5.99494010025063	0.17667	0.1779	-0.5
807	SP_014	OutWard	NE	3.80	Patient	3.585	7.5	0.17145	0.21475	0.62597	10.9563	0.019652	0.20443	0.19566	0.014487	0.3	7.27355488721804	0.36669	0.2466	0.5
808	SP_014	Inward	NE	3.80	Patient	2.355	3	0.28017	0.31999	0.43488	7.35856	0.019041	0.17969	0.22703	0.0065081	0.195	10.05435839599	0.54379	0.50311	-0.5
809	SP_014	OutWard	E	3.80	Patient	2.88	6	0.11137	0.10381	0.85214	4.7976	0.08882	0.058995	0.28428	0.013274	0.225	6.69638220551379	0.14289	0.16199	-1
810	SP_014	Inward	E	3.80	Patient	2.55	5	0.14268	0.12655	0.76534	3.82791	0.19277	0.11451	0.16186	0.031601	0.27	9.03495588972431	0.17648	0.21451	-0.5
811	SP_014	OutWard	W	5.43	Patient	2.505	5	0.22117	0.27276	0.5701	2.52211	0.39712	0.085353	0.25488	0.0048811	0.255	9.1742686716792	0.51514	0.29877	0.5
812	SP_014	Inward	W	5.43	Patient	2.145	3.5	0.25902	0.24982	0.49604	3.48346	0.03034	0.1363	0.18239	0.018246	0.03	11.5221035087719	0.48226	0.39647	0
813	SP_014	OutWard	NW	5.43	Patient	3.27	8	0.1491	0.18152	0.69859	17.7685	0.04868	0.053655	0.35572	0.0052142	0.195	9.37038521303258	0.34185	0.22723	0
814	SP_014	Inward	NW	5.43	Patient	3.21	5.5	0.19474	0.21031	0.76171	1.82323	0.058373	0.10568	0.33412	0.013725	0.134	9.72493182957394	0.36926	0.22011	0
815	SP_014	OutWard	N	5.43	Patient	3.855	7.5	0.19194	0.24546	0.63214	5.14994	0.25244	0.11522	0.25365	0.010211	0.36	6.45974235588972	0.46095	0.25422	0.5
816	SP_014	Inward	N	5.43	Patient	3.225	6.5	0.24074	0.17477	0.74755	3.24373	0.057881	0.19628	0.2454	0.010259	0.06	7.27498496240602	0.30778	0.28009	-0.5
817	SP_014	OutWard	NE	5.43	Patient	4.125	8.5	0.16204	0.19728	0.73496	11.682	0.023089	0.24722	0.38208	0.0037638	0.135	7.12154536340852	0.36951	0.20587	0.5
818	SP_014	Inward	NE	5.43	Patient	2.745	5	0.28792	0.31814	0.55551	2.01554	0.48216	0.090835	0.19217	0.0097411	0.105	10.5707107769424	0.61278	0.37349	0
819	SP_014	OutWard	E	5.43	Patient	3.51	7	0.15097	0.15497	0.69399	2.13963	0.49018	0.17316	0.1545	0.0075777	0.135	9.57006992481203	0.29043	0.23611	0
820	SP_014	Inward	E	5.43	Patient	3.135	6	0.15564	0.19691	0.58341	6.18534	0.42886	0.10283	0.1639	0.0075636	0.09	10.3660305764411	0.36569	0.27403	0
841	YC_015	OutWard	W	3.80	YoungCon	0.675	1	0.4125	0.45233	0.04071	1.61862	0.01485	0.059908	0.060781	0.0023456	0.18	50.4244360902256	0.83146	1	0
842	YC_015	Inward	W	3.80	YoungCon	0.705	1.5	0.31481	0.38566	0.05581	0.975051	0.01359	0.040654	0.075935	0.0036291	0.18	48.7044661654135	0.70511	0.86538	0.5
843	YC_015	OutWard	NW	3.80	YoungCon	0.705	1	0.36439	0.4104	0.02828	0.646084	0.013865	0.0434	0.069058	0.0018563	0.135	45.3064085213033	0.74966	1	0.5
844	YC_015	Inward	NW	3.80	YoungCon	0.705	1	0.33909	0.42846	0.01609	0.549625	0.018152	0.019181	0.063066	0.00083025	0.15	59.8828771929825	0.79348	1	1
845	YC_015	OutWard	N	3.80	YoungCon	0.78	1	0.36905	0.42549	0.03334	0.627848	0.019862	0.061981	0.059062	0.0024649	0.18	43.7265263157895	0.78955	1	1
846	YC_015	Inward	N	3.80	YoungCon	0.825	1	0.34648	0.47387	0.02855	0.377034	0.034663	0.054118	0.066351	0.0016016	0.15	49.1347919799499	0.85582	1	0.5
847	YC_015	OutWard	NE	3.80	YoungCon	0.84	1	0.31517	0.40847	0.0224800000000001	0.590384	0.018146	0.069968	0.11892	0.001486	0.18	43.5893684210526	0.7513	1	1
848	YC_015	Inward	NE	3.80	YoungCon	0.66	1	0.40909	0.4312	0.01983	0.656751	0.01888	0.027676	0.098995	0.0018899	0.165	44.0515438596491	0.78951	1	0.5
849	YC_015	OutWard	E	3.80	YoungCon	0.825	1.5	0.32051	0.37446	0.0580000000000001	0.636751	0.015467	0.048192	0.080956	0.00064386	0.18	41.3079724310777	0.68437	0.87037	0.5
850	YC_015	Inward	E	3.80	YoungCon	0.825	2	0.34458	0.51054	0.07372	1.13761	0.020264	0.027567	0.085376	0.0066804	0.18	48.3149674185464	0.91869	0.67196	1.5
851	YC_015	OutWard	W	5.43	YoungCon	0.885	1	0.28646	0.37022	0.01119	0.461509	0.013241	0.032159	0.11272	0.0010708	0.18	44.9921754385965	0.72384	1	0.5
852	YC_015	Inward	W	5.43	YoungCon	0.99	1	0.27273	0.43614	0.01688	0.375734	0.016793	0.0081786	0.061556	0.00070804	0.165	47.170679197995	0.85057	1	1
853	YC_015	OutWard	NW	5.43	YoungCon	1.005	2	0.29794	0.44158	0.03805	0.868687	0.01856	0.050795	0.10951	0.0046375	0.18	45.3028621553885	0.84897	0.65815	1
854	YC_015	Inward	NW	5.43	YoungCon	1.02	2	0.27402	0.41056	0.02805	0.824494	0.012567	0.029111	0.10389	0.0024488	0.165	46.4047493734336	0.79928	0.67708	0
855	YC_015	OutWard	N	5.43	YoungCon	0.915	1	0.34429	0.42822	0.00893999999999995	0.355769	0.01209	0.029282	0.099954	0.00095223	0.15	40.8375739348371	0.83393	1	1
856	YC_015	Inward	N	5.43	YoungCon	1.005	1.5	0.3225	0.44587	0.02552	0.602937	0.011798	0.048768	0.0444	0.0022317	0.15	45.8842380952381	0.86136	0.85	1.5
857	YC_015	OutWard	NE	5.43	YoungCon	1.08	2	0.30016	0.45908	0.0306	1.02605	0.015383	0.08302	0.11233	0.0021387	0.15	41.1204160401003	0.84815	0.6251	1
858	YC_015	Inward	NE	5.43	YoungCon	1.125	2	0.277	0.41045	0.02923	0.947293	0.0086739	0.091981	0.11611	0.0053819	0.15	40.5365614035088	0.79884	0.71786	1
859	YC_015	OutWard	E	5.43	YoungCon	0.99	1	0.2576	0.41431	0.01422	0.667794	0.015298	0.063983	0.12318	0.0014966	0.165	48.4336741854637	0.80507	1	1
860	YC_015	Inward	E	5.43	YoungCon	1.035	1.5	0.30504	0.4482	0.02801	0.691746	0.0075829	0.09225	0.052793	0.0039824	0.18	43.5232456140351	0.81921	0.86486	1
861	SP_015	OutWard	W	3.80	Patient	2.76	7.5	0.080875	0.16096	0.68309	8.85474	0.29835	0.05684	0.22907	0.0016157	0.435	14.0263030075188	0.26117	0.17265	1.5
862	SP_015	Inward	W	3.80	Patient	2.505	7	0.09598	0.14419	0.73523	13.0584	0.19376	0.16086	0.18116	0.0088982	0.24	15.8860471177945	0.21868	0.16754	2.5
863	SP_015	OutWard	NW	3.80	Patient	3.225	8	0.12154	0.15902	0.68427	8.11488	0.056152	0.079889	0.10334	0.0035798	0.24	15.301928320802	0.25242	0.21159	0
864	SP_015	Inward	NW	3.80	Patient	2.8055	8	0.082012	0.13041	0.75545	8.09369	0.30187	0.17394	0.15025	0.011761	0.405	12.7406568922306	0.18485	0.12832	0
865	SP_015	OutWard	N	3.80	Patient	2.745	7	0.1	0.083905	0.82427	2.28514	0.37125	0.35268	0.31183	0.0081924	0.27	9.76225137844611	0.11068	0.16812	0
866	SP_015	Inward	N	3.80	Patient	2.79	7	0.15212	0.1333	0.7991	7.33167	0.37046	0.096563	0.2217	0.0059396	0.195	10.5612741854637	0.19345	0.18265	0
867	SP_015	OutWard	NE	3.80	Patient	2.34	7	0.16258	0.14866	0.7406	9.31007	0.14651	0.11684	0.12238	0.036454	0.315	16.4888040100251	0.24395	0.23887	0
868	SP_015	Inward	NE	3.80	Patient	2.475	7	0.18019	0.21801	0.65613	6.60273	0.36458	0.37305	0.28797	0.021018	0.33	13.2752245614035	0.34884	0.24248	1.5
869	SP_015	OutWard	E	3.80	Patient	2.4	8	0.12313	0.076967	0.88791	12.5186	0.14154	0.12392	0.098909	0.0092164	0.375	8.00483233082707	0.091945	0.21196	0
870	SP_015	Inward	E	3.80	Patient	1.83	4.5	0.16294	0.092031	0.85362	5.6542	0.28567	0.0888	0.081465	0.010873	0.42	6.97244511278195	0.099418	0.23144	-0.5
871	SP_015	OutWard	W	5.43	Patient	4.455	12	0.049405	0.07969	0.85348	16.7304	0.17726	0.084946	0.26706	0.0077552	0.27	11.315356641604	0.1367	0.077889	3
872	SP_015	Inward	W	5.43	Patient	3.03	8.5	0.079572	0.11212	0.77681	9.70908	0.33636	0.11513	0.13542	0.0037529	0.24	12.8464974937343	0.2027	0.13903	4
873	SP_015	OutWard	NW	5.43	Patient	3.33	8	0.10181	0.088719	0.83886	14.2767	0.27096	0.14855	0.24542	0.0033632	0.225	9.8987350877193	0.15582	0.14855	0
874	SP_015	Inward	NW	5.43	Patient	3.705	11.5	0.10671	0.079868	0.84705	9.34639	0.13416	0.086365	0.28329	0.0039066	0.1595	7.11015363408521	0.138	0.1406	2
875	SP_015	OutWard	N	5.43	Patient	3.63	10.5	0.10863	0.11447	0.79962	2.39872	0.3322	0.092857	0.38967	0.007828	0.345	10.7681308270677	0.20341	0.15899	0.5
876	SP_015	Inward	N	5.43	Patient	4.62	12.5	0.067818	0.14787	0.71461	12.2949	0.37052	0.065157	0.26763	0.0022361	0.39	10.649564160401	0.26388	0.098545	2.5
877	SP_015	OutWard	NE	5.43	Patient	4.02	11.5	0.064627	0.11357	0.79991	13.848	0.037567	0.066003	0.23029	0.0026797	0.45	10.9535200501253	0.20426	0.10827	2.5
878	SP_015	Inward	NE	5.43	Patient	5.07	13.5	0.07783	0.15244	0.72454	4.13712	0.15483	0.13978	0.068231	0.0023836	0.24	13.2178593984962	0.27533	0.11351	3.5
879	SP_015	OutWard	E	5.43	Patient	4.545	13.5	0.067903	0.13474	0.74502	8.59794	0.3961	0.16365	0.19021	0.0067533	0.66	12.1918245614035	0.24541	0.12994	5
880	SP_015	Inward	E	5.43	Patient	3.69	10	0.11187	0.18184	0.66757	12.9607	0.27264	0.12318	0.070409	0.0096202	0.285	13.5903423558897	0.33958	0.16034	3
901	YC_016	OutWard	W	3.80	YoungCon	1.035	2	0.24346	0.44663	0.06429	0.841088	0.019244	0.1041	0.082831	0.0047533	0.12	51.7557919799499	0.80769	0.77234	0
902	YC_016	Inward	W	3.80	YoungCon	0.81	2	0.29865	0.50404	0.11069	3.60255	0.025761	0.091185	0.12613	0.023208	0.09	68.9387518796993	0.83452	0.56219	1
903	YC_016	OutWard	NW	3.80	YoungCon	0.84	2	0.25901	0.39797	0.10832	0.931613	0.052392	0.090865	0.012012	0.0011554	0.18	55.7591428571429	0.73328	0.56818	0
904	YC_016	Inward	NW	3.80	YoungCon	0.795	2	0.28815	0.42813	0.08975	1.34902	0.018634	0.076833	0.075823	0.0032446	0.12	57.7366165413534	0.78382	0.60769	0.5
905	YC_016	OutWard	N	3.80	YoungCon	0.72	1	0.38406	0.45246	0.03842	1.37721	0.024902	0.033272	0.041986	0.0021923	0.03	56.736290726817	0.80729	1	0
906	YC_016	Inward	N	3.80	YoungCon	0.78	2	0.32325	0.55372	0.04426	1.93115	0.038846	0.07253	0.041743	0.0059562	0.09	57.173962406015	0.88519	0.66187	0.5
907	YC_016	OutWard	NE	3.80	YoungCon	0.78	1	0.3381	0.45281	0.01575	0.689574	0.019775	0.070526	0.083191	0.0020797	0.09	52.3820250626566	0.83895	1	1
908	YC_016	Inward	NE	3.80	YoungCon	0.78	1.5	0.3046	0.52002	0.05793	3.26897	0.025949	0.041781	0.060953	0.0058791	0.03	55.6968145363409	0.87101	0.8125	0
909	YC_016	OutWard	E	3.80	YoungCon	0.825	2	0.25463	0.3742	0.20223	2.21175	0.029393	0.060037	0.13745	0.0053535	0.195	54.0693759398496	0.66557	0.56039	0
910	YC_016	Inward	E	3.80	YoungCon	0.72	1.5	0.33742	0.49158	0.0563	1.63481	0.0083986	0.067229	0.049704	0.0098947	0.12	62.1967644110276	0.8082	0.85484	0
911	YC_016	OutWard	W	5.43	YoungCon	0.795	1.5	0.28276	0.39266	0.07037	0.637343	0.031084	0.043488	0.053391	0.00071528	0.12	61.0444862155389	0.76508	0.78846	0
912	YC_016	Inward	W	5.43	YoungCon	0.87	1.5	0.24167	0.4449	0.04821	0.582858	0.027812	0.061087	0.1059	0.011927	0.165	74.0459724310777	0.85991	0.75	0
913	YC_016	OutWard	NW	5.43	YoungCon	1.17	3	0.19084	0.35956	0.12606	1.58624	0.016218	0.1065	0.10366	0.0031579	0.075	53.8747268170426	0.69646	0.41826	0.5
914	YC_016	Inward	NW	5.43	YoungCon	0.78	1.5	0.28846	0.45088	0.0593900000000001	0.576382	0.026196	0.030998	0.03523	0.014643	0.03	54.1593082706767	0.86129	0.80769	0
915	YC_016	OutWard	N	5.43	YoungCon	0.81	1	0.33333	0.44094	0.00961999999999996	0.530273	0.040946	0.043368	0.039425	0.001221	0.045	54.3829398496241	0.85521	1	0
916	YC_016	Inward	N	5.43	YoungCon	0.885	2	0.25495	0.50776	0.04265	0.80378	0.036617	0.019768	0.059307	0.0016653	0.105	67.1219799498747	0.93774	0.60087	0.5
917	YC_016	OutWard	NE	5.43	YoungCon	0.915	2	0.25538	0.48922	0.06088	1.96287	0.024753	0.088466	0.10114	0.0081421	0.03	50.081619047619	0.88262	0.65938	0.5
918	YC_016	Inward	NE	5.43	YoungCon	0.915	2	0.26319	0.4825	0.03577	0.557841	0.016961	0.072218	0.040412	0.0065888	0.045	53.5644812030075	0.86195	0.59148	0
919	YC_016	OutWard	E	5.43	YoungCon	1.005	2	0.25401	0.36758	0.13565	1.74612	0.021937	0.030914	0.051148	0.0097281	0.09	54.8180426065163	0.69652	0.56913	0.5
920	YC_016	Inward	E	5.43	YoungCon	0.93	2.5	0.25806	0.48406	0.05948	1.01988	0.006305	0.078299	0.069494	0.0029377	0.09	62.2179573934837	0.83656	0.54931	0.5
921	SP_016	OutWard	W	3.80	Patient	1.305	3	0.2967	0.28438	0.54349	9.29151	0.015112	0.17146	0.14141	0.024505	0.18	25.6544010025063	0.52323	0.3956	0.5
922	SP_016	Inward	W	3.80	Patient	1.335	2.5	0.28741	0.43451	0.19337	7.51692	0.043099	0.10602	0.14571	0.017095	0.195	31.3952531328321	0.7109	0.50606	0
923	SP_016	OutWard	NW	3.80	Patient	1.485	2.5	0.27346	0.4173	0.16206	5.45355	0.070363	0.10337	0.099672	0.055997	0.18	25.2176466165414	0.73748	0.58824	0
924	SP_016	Inward	NW	3.80	Patient	1.185	2	0.30286	0.40419	0.15506	2.31353	0.029127	0.059797	0.043485	0.016465	0.195	33.570015037594	0.71178	0.67714	0.5
925	SP_016	OutWard	N	3.80	Patient	1.245	2	0.33498	0.47338	0.17778	1.8106	0.02637	0.074372	0.11047	0.015231	0.195	24.771226566416	0.78053	0.62555	0
926	SP_016	Inward	N	3.80	Patient	1.305	2	0.30213	0.40406	0.10098	3.24734	0.036852	0.13848	0.19426	0.0088564	0.225	30.0779172932331	0.73468	0.73828	-0.5
927	SP_016	OutWard	NE	3.80	Patient	1.17	2.5	0.28158	0.34484	0.3507	9.62122	0.090011	0.18742	0.17259	0.016316	0.225	28.5044561403509	0.62816	0.44671	0
928	SP_016	Inward	NE	3.80	Patient	1.305	3	0.19327	0.29217	0.31621	12.1238	0.042348	0.15518	0.28772	0.013356	0.21	37.4434912280702	0.51426	0.43637	-0.5
929	SP_016	OutWard	E	3.80	Patient	1.245	2.5	0.32865	0.37288	0.34698	4.83409	0.24896	0.22399	0.11054	0.034808	0.21	28.7608822055138	0.58136	0.50058	0
930	SP_016	Inward	E	3.80	Patient	1.215	3.5	0.22195	0.35288	0.2895	7.71349	0.013172	0.17804	0.17519	0.011797	0.225	43.8486541353384	0.64512	0.44898	0
931	SP_016	OutWard	W	5.43	Patient	1.89	4.5	0.21491	0.30474	0.42626	11.0097	0.3911	0.037061	0.18807	0.0044276	0.255	21.3606814536341	0.5939	0.32221	0.5
932	SP_016	Inward	W	5.43	Patient	1.455	2.5	0.23701	0.49659	0.13654	5.56549	0.14663	0.19492	0.2088	0.0062775	0.18	38.280694235589	0.65388	0.57735	0.5
933	SP_016	OutWard	NW	5.43	Patient	1.68	3.5	0.22929	0.30775	0.31298	4.06244	0.064667	0.077429	0.14428	0.0070061	0.18	28.3308872180451	0.62934	0.38468	1
934	SP_016	Inward	NW	5.43	Patient	1.32	2.5	0.27778	0.3984	0.29307	2.45865	0.043512	0.031917	0.19821	0.011232	0.255	25.3661077694236	0.74104	0.50837	0.5
935	SP_016	OutWard	N	5.43	Patient	1.62	3	0.27021	0.33087	0.13344	0.705168	0.016797	0.048745	0.21102	0.011233	0.165	24.2024197994987	0.62458	0.57521	0
936	SP_016	Inward	N	5.43	Patient	1.47	3	0.20351	0.29116	0.32617	3.00334	0.021817	0.15222	0.13737	0.0058555	0.24	23.3141997493734	0.55892	0.41458	0
937	SP_016	OutWard	NE	5.43	Patient	1.545	3	0.31038	0.44341	0.16532	3.47188	0.018008	0.046023	0.10632	0.012307	0.225	36.6980100250627	0.75824	0.50472	0.5
938	SP_016	Inward	NE	5.43	Patient	1.53	3.5	0.23192	0.33935	0.20708	4.35592	0.072011	0.086443	0.16778	0.0019127	0.18	26.5867694235589	0.60535	0.48859	-0.5
939	SP_016	OutWard	E	5.43	Patient	1.665	3.5	0.19928	0.30876	0.32606	0.854341	0.10782	0.15182	0.15564	0.005098	0.24	27.755679197995	0.59464	0.38178	0.5
940	SP_016	Inward	E	5.43	Patient	1.905	4	0.19601	0.36546	0.10384	3.02729	0.02853	0.088189	0.24842	0.0069288	0.255	33.707709273183	0.69949	0.44936	2
961	YC_017	OutWard	W	3.80	YoungCon	0.975	2	0.25	0.34821	0.26255	0.896535	0.02204	0.024156	0.1056	0.0041054	0.03	44.6882781954887	0.62651	0.48611	0.5
962	YC_017	Inward	W	3.80	YoungCon	0.945	2	0.30152	0.49509	0.06499	2.55818	0.013663	0.054576	0.067779	0.0096018	0.15	53.6504812030075	0.90664	0.66029	1
963	YC_017	OutWard	NW	3.80	YoungCon	0.84	1.5	0.36176	0.47693	0.07436	2.8571	0.037944	0.057158	0.06524	0.0058058	0.09	44.2916390977444	0.88101	0.82353	0.5
964	YC_017	Inward	NW	3.80	YoungCon	0.855	1.5	0.29167	0.40355	0.10149	0.60342	0.026992	0.084375	0.11105	0.013501	0.15	49.2338370927318	0.74457	0.80303	0
965	YC_017	OutWard	N	3.80	YoungCon	0.885	1	0.34409	0.36201	0.03259	0.611528	0.027235	0.058205	0.12987	0.0024338	0.075	39.1528521303258	0.6625	1	0.5
966	YC_017	Inward	N	3.80	YoungCon	0.87	1.5	0.34286	0.47671	0.03296	0.662106	0.0091494	0.053211	0.074592	0.0027903	0.12	51.7238822055138	0.88015	0.85714	1
967	YC_017	OutWard	NE	3.80	YoungCon	1.05	2	0.22642	0.30294	0.30963	1.17691	0.02066	0.19599	0.11242	0.019544	0.135	36.6697268170426	0.54085	0.45285	0
968	YC_017	Inward	NE	3.80	YoungCon	0.765	1	0.33308	0.42254	0.03806	0.647269	0.01187	0.064461	0.13271	0.0044208	0.15	49.3504611528822	0.77317	1	1
969	YC_017	OutWard	E	3.80	YoungCon	0.99	2	0.26195	0.31303	0.19506	1.02104	0.017948	0.082083	0.083425	0.01197	0.165	42.565962406015	0.55881	0.60279	-0.5
970	YC_017	Inward	E	3.80	YoungCon	0.78	1.5	0.33036	0.41847	0.10593	0.303869	0.011278	0.02904	0.13826	0.02874	0.195	46.9015488721804	0.75529	0.80357	0.5
971	YC_017	OutWard	W	5.43	YoungCon	1.02	2.5	0.26872	0.40341	0.0835	1.30725	0.016869	0.1234	0.083537	0.017128	0.12	41.5403182957393	0.78166	0.63879	0
972	YC_017	Inward	W	5.43	YoungCon	1.02	3	0.22121	0.3394	0.30431	1.69355	0.033489	0.1002	0.14875	0.00049019	0.165	41.34	0.65514	0.41385	0
973	YC_017	OutWard	NW	5.43	YoungCon	1.155	2.5	0.22087	0.41544	0.08033	1.96826	0.026968	0.07166	0.084463	0.015637	0.15	53.1614736842105	0.77778	0.57554	1
974	YC_017	Inward	NW	5.43	YoungCon	1.155	3	0.2047	0.35352	0.08975	1.61163	0.018762	0.031739	0.113	0.0038891	0.075	39.0981929824561	0.68715	0.45848	0
975	YC_017	OutWard	N	5.43	YoungCon	1.1395	2	0.29825	0.4316	0.0421899999999999	0.70684	0.023348	0.057404	0.096592	0.0055591	0.0455	44.4349097744361	0.82599	0.6886	1.5
976	YC_017	Inward	N	5.43	YoungCon	1.14	2	0.26389	0.53041	0.06534	0.402226	0.089518	0.047595	0.055041	0.0025385	0.06	52.1269899749373	0.93178	0.53571	0.5
977	YC_017	OutWard	NE	5.43	YoungCon	1.32	2.5	0.20938	0.33404	0.06396	2.27805	0.12123	0.138	0.17809	0.0025265	0.105	41.92264160401	0.6488	0.61364	0.5
978	YC_017	Inward	NE	5.43	YoungCon	1.17	2	0.25	0.4394	0.08265	1.7319	0.012102	0.016524	0.088059	0.002128	0.105	46.5501629072682	0.85776	0.62135	1
979	YC_017	OutWard	E	5.43	YoungCon	1.125	2	0.28125	0.41219	0.02808	1.01745	0.030444	0.10636	0.12066	0.0042618	0.105	38.0856365914787	0.78509	0.75601	0.5
980	YC_017	Inward	E	5.43	YoungCon	0.975	2	0.27699	0.37471	0.05061	0.487357	0.030162	0.094194	0.179	0.011939	0.135	43.6801578947368	0.72816	0.72396	0.5
981	SP_017	OutWard	W	3.80	Patient	2.07	4	0.18086	0.22499	0.46117	6.41367	0.0020672	0.09566	0.28643	0.034112	0.195	13.3229263157895	0.3714	0.3464	-0.5
982	SP_017	Inward	W	3.80	Patient	1.575	2.5	0.24041	0.25161	0.56991	8.70105	0.14995	0.12148	0.2129	0.033197	0.24	15.7122972431078	0.44664	0.38035	-1
983	SP_017	OutWard	NW	3.80	Patient	2.1	3.5	0.21852	0.24252	0.59587	9.36873	0.41458	0.17896	0.18716	0.027903	0.195	12.6108744360902	0.40909	0.31579	0
984	SP_017	Inward	NW	3.80	Patient	1.77	2.5	0.26427	0.20148	0.51878	7.93755	0.014006	0.090661	0.19559	0.016615	0.3	15.4796295739348	0.36619	0.48922	0
985	SP_017	OutWard	N	3.80	Patient	1.47	3	0.24069	0.19362	0.67196	10.6238	0.042483	0.20032	0.11615	0.026963	0.285	12.2716897243108	0.32375	0.34567	-1
986	SP_017	Inward	N	3.80	Patient	1.935	3	0.2362	0.32535	0.29924	3.81943	0.021706	0.17643	0.23711	0.025207	0.195	18.483177443609	0.57894	0.47807	0
987	SP_017	OutWard	NE	3.80	Patient	2.265	4.5	0.19217	0.24576	0.51084	7.04025	0.024168	0.080131	0.05483	0.0096586	0.315	15.9399857142857	0.43709	0.35075	-0.5
988	SP_017	Inward	NE	3.80	Patient	1.545	2.5	0.27352	0.28825	0.4077	5.21303	0.0091117	0.12572	0.27543	0.027471	0.21	17.0633320802005	0.49475	0.41811	0
989	SP_017	OutWard	E	3.80	Patient	1.92	2.5	0.30901	0.30543	0.24246	3.61024	0.01293	0.1163	0.1271	0.052249	0.27	14.0733543859649	0.55777	0.59107	0.5
990	SP_017	Inward	E	3.80	Patient	1.785	2.5	0.35806	0.33092	0.37463	6.26798	0.065144	0.092523	0.060814	0.032809	0.21	19.4265799498747	0.51895	0.57033	0
991	SP_017	OutWard	W	5.43	Patient	2.52	5.5	0.1519	0.18969	0.49407	4.94298	0.022511	0.071183	0.057405	0.007612	0.225	16.4628904761905	0.36536	0.30245	1.5
992	SP_017	Inward	W	5.43	Patient	1.545	2	0.32063	0.41866	0.12313	1.73633	0.021113	0.10386	0.10139	0.009862	0.225	21.6294674185464	0.81262	0.68591	0
993	SP_017	OutWard	NW	5.43	Patient	2.745	5	0.19416	0.28593	0.46929	1.2982	0.028897	0.15393	0.085466	0.015104	0.21	16.4017957393484	0.54092	0.29495	1.5
994	SP_017	Inward	NW	5.43	Patient	1.935	3	0.18796	0.27407	0.21777	3.136	0.0049195	0.078226	0.293	0.0073289	0.24	17.4359521303258	0.53103	0.43575	0.5
995	SP_017	OutWard	N	5.43	Patient	3.27	6.5	0.17003	0.39701	0.12711	1.69101	0.36924	0.24072	0.16378	0.0037103	0.315	18.1165749373434	0.75433	0.30833	1
996	SP_017	Inward	N	5.43	Patient	2.31	4	0.15045	0.25788	0.41182	2.72651	0.010461	0.034477	0.24382	0.015181	0.345	16.4737977443609	0.49325	0.35051	1.5
997	SP_017	OutWard	NE	5.43	Patient	1.62	2.5	0.2637	0.42612	0.21528	4.44096	0.33194	0.21755	0.10825	0.0079538	0.345	21.1514874686717	0.77533	0.45673	-1
998	SP_017	Inward	NE	5.43	Patient	2.217	3	0.21164	0.2707	0.38389	2.50928	0.012199	0.088538	0.28523	0.014107	0.135	17.5775804511278	0.51963	0.44215	1
999	SP_017	OutWard	E	5.43	Patient	2.76	5	0.17886	0.28501	0.22354	3.10072	0.01979	0.036495	0.24137	0.01055	0.27	14.9706528822055	0.5526	0.39186	1
1000	SP_017	Inward	E	5.43	Patient	2.865	5.5	0.16792	0.39378	0.15624	3.79936	0.45077	0.29055	0.067228	0.012818	0.24	20.7557263157895	0.78594	0.33743	1.5
1021	YC_018	OutWard	W	3.80	YoungCon	0.945	1	0.34879	0.45653	0.03587	1.76285	0.023603	0.07837	0.13193	0.0019573	0.225	34.7763258145363	0.84149	1	1
1022	YC_018	Inward	W	3.80	YoungCon	0.885	1	0.35214	0.47148	0.03207	0.923795	0.046927	0.061237	0.092894	0.0012836	0.21	41.8396165413534	0.87445	1	0.5
1023	YC_018	OutWard	NW	3.80	YoungCon	0.87	1.5	0.33772	0.43243	0.05197	1.16596	0.015804	0.078264	0.13715	0.00638	0.195	40.2035664160401	0.79683	0.85526	1
1024	YC_018	Inward	NW	3.80	YoungCon	1.215	2	0.22041	0.43629	0.0742699999999999	1.70108	0.017092	0.02032	0.059463	0.0019416	0.165	48.0317042606516	0.79196	0.58776	1.5
1025	YC_018	OutWard	N	3.80	YoungCon	0.96	2.5	0.30587	0.43846	0.05631	2.22585	0.077568	0.036477	0.10682	0.0025739	0.09	32.081007518797	0.81268	0.81897	0.5
1026	YC_018	Inward	N	3.80	YoungCon	0.645	1	0.40476	0.45391	0.05581	1.70866	0.026349	0.046812	0.10935	0.027297	0.18	48.2603333333333	0.82539	1	0.5
1027	YC_018	OutWard	NE	3.80	YoungCon	0.93	1	0.38575	0.47794	0.04	0.967925	0.068365	0.087251	0.073268	0.013091	0.195	30.8239974937343	0.82257	1	1
1028	YC_018	Inward	NE	3.80	YoungCon	0.9	1	0.3694	0.43977	0.02508	0.629599	0.0168	0.044586	0.055859	0.034021	0.135	37.3513709273183	0.80545	1	1
1029	YC_018	OutWard	E	3.80	YoungCon	0.93	1	0.47727	0.47612	0.0331900000000001	0.548676	0.027819	0.054778	0.14873	0.0030489	0.225	31.6275313283208	0.88912	1	0.5
1030	YC_018	Inward	E	3.80	YoungCon	0.915	1.5	0.39543	0.47446	0.05218	1.35374	0.026015	0.021376	0.081019	0.0059359	0.195	39.0922456140351	0.84339	0.85938	1
1031	YC_018	OutWard	W	5.43	YoungCon	1.23	2	0.28224	0.44899	0.04511	0.880642	0.022035	0.040297	0.13403	0.0031361	0.225	40.3232731829574	0.86621	0.69038	1
1032	YC_018	Inward	W	5.43	YoungCon	1.185	3	0.26584	0.52664	0.02767	1.06965	0.019093	0.030878	0.11869	0.002148	0.165	56.1940476190476	0.92694	0.50186	1
1033	YC_018	OutWard	NW	5.43	YoungCon	1.185	2.5	0.2822	0.43943	0.03457	1.05167	0.0099549	0.050419	0.091094	0.0024413	0.21	44.8951829573935	0.85193	0.54447	1.5
1034	YC_018	Inward	NW	5.43	YoungCon	1.2	3	0.19331	0.43298	0.06718	1.35196	0.026649	0.077412	0.15905	0.0016178	0.195	51.3882481203008	0.84357	0.44447	1.5
1035	YC_018	OutWard	N	5.43	YoungCon	1.275	3	0.28121	0.45341	0.0673	1.26541	0.026439	0.076554	0.11361	0.0022688	0.195	43.7318822055138	0.88317	0.52331	1
1036	YC_018	Inward	N	5.43	YoungCon	1.02	2	0.27951	0.46156	0.03665	1.08725	0.024154	0.030386	0.039122	0.0029288	0.21	51.1368370927318	0.88706	0.67813	1
1037	YC_018	OutWard	NE	5.43	YoungCon	1.14	2	0.33611	0.51398	0.03467	1.30483	0.01621	0.062666	0.071323	0.0076549	0.195	38.4848195488722	0.85784	0.68333	1.5
1038	YC_018	Inward	NE	5.43	YoungCon	1.095	2.5	0.3062	0.47644	0.05957	1.96725	0.0076848	0.026385	0.057727	0.0066093	0.195	41.6460827067669	0.92847	0.62403	1
1039	YC_018	OutWard	E	5.43	YoungCon	1.065	1	0.3881	0.40724	0.01013	0.512286	0.013693	0.072211	0.16893	0.0063305	0.21	36.4643308270677	0.79344	1	0.5
1040	YC_018	Inward	E	5.43	YoungCon	0.945	1.5	0.38333	0.54034	0.02804	0.246771	0.04903	0.062883	0.074377	0.0032203	0.18	41.4603082706767	0.87454	0.80303	1
1041	SP_018	OutWard	W	3.80	Patient	2.055	3	0.19063	0.20319	0.54674	12.6863	0.025685	0.15995	0.34371	0.0036786	0.36	16.0579954887218	0.36283	0.40995	1
1042	SP_018	Inward	W	3.80	Patient	2.67	4	0.167	0.23536	0.471	2.65723	0.35519	0.069474	0.21132	0.036591	0.225	15.8060714285714	0.40613	0.35348	2
1043	SP_018	OutWard	NW	3.80	Patient	2.115	2.5	0.22598	0.34318	0.10366	3.05058	0.040013	0.12027	0.23303	0.0097229	0.345	21.8411606516291	0.61303	0.56618	1
1044	SP_018	Inward	NW	3.80	Patient	2.745	5	0.13123	0.25843	0.45261	6.84076	0.27943	0.20885	0.046057	0.017699	0.33	20.4517243107769	0.44725	0.25504	1
1045	SP_018	OutWard	N	3.80	Patient	2.97	4	0.21314	0.25267	0.64624	13.391	0.025696	0.19996	0.27425	0.00023738	0.3	9.09340802005013	0.45395	0.27644	1
1046	SP_018	Inward	N	3.80	Patient	3.075	6.5	0.15627	0.17251	0.60522	1.7514	0.34409	0.28762	0.12582	0.021064	0.375	13.8805561403509	0.27301	0.26942	-0.5
1047	SP_018	OutWard	NE	3.80	Patient	4.56	8.5	0.14744	0.16853	0.67912	29.2345	0.48405	0.089992	0.13643	0.0048751	0.195	11.9271581453634	0.2514	0.19603	2.5
1048	SP_018	Inward	NE	3.80	Patient	2.325	3.5	0.2114	0.20223	0.61426	4.9131	0.028935	0.13845	0.15902	0.026348	0.36	13.9845105263158	0.36553	0.31582	0
1049	SP_018	OutWard	E	3.80	Patient	2.445	4	0.10566	0.14912	0.62401	10.2336	0.039361	0.056302	0.049379	0.0047783	0.45	13.7047010025063	0.23197	0.24231	1
1050	SP_018	Inward	E	3.80	Patient	2.115	4	0.19576	0.29062	0.57323	1.91124	0.010177	0.21161	0.40747	0.027052	0.315	14.1683062656642	0.51189	0.26101	1
1051	SP_018	OutWard	W	5.43	Patient	2.58	5.5	0.12659	0.15182	0.76086	23.29	0.43601	0.2204	0.2521	0.0073767	0.78	9.31016516290727	0.28314	0.2344	0
1052	SP_018	Inward	W	5.43	Patient	2.925	6	0.11272	0.14278	0.62283	3.48093	0.28364	0.24319	0.070788	0.016378	0.315	12.7075205513784	0.27207	0.24498	1.5
1053	SP_018	OutWard	NW	5.43	Patient	6.945	13	0.05674	0.22572	0.62957	11.5252	0.051118	0.14332	0.28435	0.0064468	0.6	15.2776894736842	0.39636	0.089353	7
1054	SP_018	Inward	NW	5.43	Patient	4.335	10	0.075375	0.14816	0.76297	3.76101	0.40571	0.17328	0.13435	0.0069982	0.315	13.190126566416	0.27406	0.10581	2
1055	SP_018	OutWard	N	5.43	Patient	3.75	7	0.1331	0.12068	0.76023	14.3605	0.016387	0.29424	0.23529	0.0070405	0.33	8.34000977443609	0.21951	0.22732	0
1056	SP_018	Inward	N	5.43	Patient	5.565	14	0.1118	0.16138	0.57473	13.262	0.32364	0.069951	0.072526	0.0088349	0.15	10.7696726817043	0.2987	0.18767	4
1057	SP_018	OutWard	NE	5.43	Patient	3.57	6	0.13031	0.15714	0.65836	20.3503	0.01726	0.16432	0.36437	0.0023211	0.36	11.2012203007519	0.31743	0.22244	3
1058	SP_018	Inward	NE	5.43	Patient	4.29	10	0.13007	0.18732	0.66246	9.1014	0.0071579	0.10857	0.35143	0.012548	0.285	11.6347325814536	0.35919	0.16934	2
1059	SP_018	OutWard	E	5.43	Patient	3.195	7	0.11619	0.13372	0.73281	10.7292	0.034389	0.15519	0.36785	0.0078081	0.195	11.8753959899749	0.241	0.17948	1
1060	SP_018	Inward	E	5.43	Patient	3.075	4.5	0.28174	0.43448	0.37982	1.64985	0.0057687	0.23049	0.090579	0.006263	0.315	13.6329824561404	0.80796	0.35171	1.5
1081	YC_019	OutWard	W	3.80	YoungCon	0.84	1.5	0.22381	0.41389	0.10212	3.28868	0.023737	0.033181	0.06878	0.040009	0.21	59.8720927318296	0.74422	0.71429	0.5
1082	YC_019	Inward	W	3.80	YoungCon	0.585	1.5	0.4	0.45863	0.06314	0.995892	0.042983	0.093128	0.063661	0.018935	0.045	64.6195062656642	0.78404	0.85417	0.5
1083	YC_019	OutWard	NW	3.80	YoungCon	0.75	2	0.27627	0.39583	0.1022	1.15737	0.011902	0.070627	0.070505	0.010806	0.12	56.8562005012531	0.72333	0.61455	0
1084	YC_019	Inward	NW	3.80	YoungCon	0.69	1.5	0.32609	0.44335	0.06537	2.31154	0.045599	0.10553	0.057037	0.0015097	0.09	61.8580827067669	0.81832	0.82609	0
1085	YC_019	OutWard	N	3.80	YoungCon	0.78	1.5	0.29242	0.44015	0.0529500000000001	0.630574	0.030566	0.067362	0.10892	0.004117	0.195	53.3952556390977	0.81702	0.81667	0
1086	YC_019	Inward	N	3.80	YoungCon	0.66	1	0.37229	0.50064	0.05997	1.42029	0.026746	0.035412	0.049828	0.0015525	0.105	59.5389674185464	0.87056	1	0.5
1087	YC_019	OutWard	NE	3.80	YoungCon	0.75	1.5	0.3	0.38091	0.11577	0.586838	0.012337	0.036469	0.11728	0.0042031	0.225	47.2285513784461	0.70627	0.8	0
1088	YC_019	Inward	NE	3.80	YoungCon	0.705	1	0.34058	0.50392	0.0196499999999999	0.73091	0.015064	0.037412	0.070114	0.0023495	0.195	57.3508796992481	0.91446	1	0.5
1089	YC_019	OutWard	E	3.80	YoungCon	0.795	2	0.245	0.32721	0.23153	3.35912	0.027196	0.095853	0.17541	0.007171	0.225	51.9292631578947	0.58331	0.54786	0.5
1090	YC_019	Inward	E	3.80	YoungCon	0.72	1.5	0.33236	0.49052	0.05446	1.49918	0.014099	0.072855	0.059991	0.010663	0.24	65.567694235589	0.87906	0.8125	0
1091	YC_019	OutWard	W	5.43	YoungCon	0.765	1.5	0.23538	0.37301	0.04254	0.452533	0.010932	0.048139	0.070802	0.0036913	0.225	60.9260802005013	0.72196	0.78846	1
1092	YC_019	Inward	W	5.43	YoungCon	0.84	2.5	0.25	0.47109	0.04842	0.551475	0.015299	0.030409	0.052185	0.0039452	0.195	72.7307243107769	0.90617	0.55357	0
1093	YC_019	OutWard	NW	5.43	YoungCon	0.915	2.5	0.21591	0.43287	0.06518	2.351	0.017034	0.015042	0.06174	0.00091504	0.27	60.4921578947368	0.83131	0.5293	0.5
1094	YC_019	Inward	NW	5.43	YoungCon	0.9	2.5	0.23471	0.44515	0.05032	0.561201	0.011259	0.057018	0.080892	0.0011276	0.195	64.5413609022556	0.85862	0.55339	1
1095	YC_019	OutWard	N	5.43	YoungCon	0.96	2	0.26946	0.48303	0.05158	1.13126	0.0090943	0.065935	0.033289	0.0030151	0.255	58.7278546365915	0.91721	0.58473	1
1096	YC_019	Inward	N	5.43	YoungCon	0.945	3	0.25223	0.55044	0.07137	0.910548	0.019027	0.074212	0.09743	0.00052941	0.21	72.3301378446115	0.87325	0.46875	0.5
1097	YC_019	OutWard	NE	5.43	YoungCon	0.9	2	0.26786	0.46839	0.04147	2.11555	0.020732	0.080109	0.13743	0.0013398	0.225	58.0238646616541	0.84074	0.66146	1
1098	YC_019	Inward	NE	5.43	YoungCon	1.215	3.5	0.197	0.44457	0.0817099999999999	2.1875	0.028028	0.065559	0.10521	0.0020951	0.21	60.9198220551378	0.85611	0.40725	1.5
1099	YC_019	OutWard	E	5.43	YoungCon	1.065	2.5	0.20556	0.41001	0.20265	2.31426	0.011276	0.044565	0.068491	0.0027489	0.225	62.4946842105263	0.79399	0.4	0.5
1100	YC_019	Inward	E	5.43	YoungCon	0.99	3	0.21232	0.51726	0.07551	2.80657	0.024927	0.05723	0.10444	0.00081977	0.24	70.2528947368421	0.87919	0.51261	2
1101	SP_019	OutWard	W	3.80	Patient	2.16	4	0.19304	0.18417	0.52886	7.74437	0.049376	0.074034	0.22538	0.023569	0.3	19.0345493734336	0.3146	0.36551	0.5
1102	SP_019	Inward	W	3.80	Patient	1.965	4	0.25824	0.49067	0.21138	9.12154	0.016718	0.057077	0.074515	0.012528	0.255	32.532671679198	0.61489	0.50806	0.5
1103	SP_019	OutWard	NW	3.80	Patient	2.46	4.5	0.20001	0.31806	0.45359	6.1001	0.068657	0.14894	0.17653	0.0062513	0.315	14.9069859649123	0.55135	0.3462	0
1104	SP_019	Inward	NW	3.80	Patient	2.13	3	0.30326	0.3508	0.13367	6.53015	0.026187	0.12607	0.13297	0.022495	0.195	16.5264080200501	0.6294	0.62785	1
1105	SP_019	OutWard	N	3.80	Patient	2.115	3.5	0.27717	0.27845	0.48138	6.00542	0.022432	0.04442	0.18655	0.015345	0.345	13.210643358396	0.4978	0.43116	0
1106	SP_019	Inward	N	3.80	Patient	1.71	3	0.33148	0.42139	0.18646	5.58661	0.026701	0.062939	0.053369	0.011671	0.255	19.9231423558897	0.79514	0.68627	0.5
1107	SP_019	OutWard	NE	3.80	Patient	1.95	4	0.1944	0.2329	0.5061	4.19608	0.032576	0.14128	0.15388	0.030755	0.33	15.489471679198	0.40877	0.31273	1
1108	SP_019	Inward	NE	3.80	Patient	1.575	3.5	0.22301	0.31339	0.32461	2.76187	0.07999	0.056786	0.17101	0.01173	0.3	19.7208834586466	0.55859	0.4375	1
1109	SP_019	OutWard	E	3.80	Patient	2.235	4	0.29074	0.41368	0.17808	9.20145	0.088235	0.049271	0.083186	0.0045016	0.435	25.3248721804511	0.73194	0.46812	1.5
1110	SP_019	Inward	E	3.80	Patient	1.53	3	0.30269	0.35955	0.24289	7.60051	0.030514	0.078364	0.16478	0.013566	0.33	24.1466882205514	0.68001	0.53731	0
1111	SP_019	OutWard	W	5.43	Patient	2.625	4	0.25132	0.27315	0.28542	3.6788	0.032711	0.11365	0.05621	0.0086288	0.3	18.2504909774436	0.52514	0.46086	1
1112	SP_019	Inward	W	5.43	Patient	3.045	6	0.24296	0.47755	0.23239	11.8723	0.078866	0.11731	0.13903	0.0025687	0.33	27.8227318295739	0.57277	0.39163	1.5
1113	SP_019	OutWard	NW	5.43	Patient	2.835	5.5	0.15882	0.26033	0.29468	3.63957	0.023257	0.013729	0.2023	0.01254	0.285	14.6941761904762	0.47624	0.43142	0.5
1114	SP_019	Inward	NW	5.43	Patient	2.79	5.5	0.19341	0.33074	0.18865	8.3531	0.06279	0.037203	0.08487	0.0069219	0.315	18.8686030075188	0.63157	0.43498	1.5
1115	SP_019	OutWard	N	5.43	Patient	3.165	6.5	0.099461	0.1182	0.8186	19.7774	0.01139	0.23344	0.15221	0.0062248	0.375	9.39876967418546	0.18699	0.13504	0.5
1116	SP_019	Inward	N	5.43	Patient	2.7	5.5	0.24506	0.43578	0.24578	5.72619	0.040864	0.16631	0.13167	0.0055252	0.3	17.2459197994987	0.82469	0.42784	1
1117	SP_019	OutWard	NE	5.43	Patient	2.01	4	0.12702	0.20204	0.58731	9.51735	0.038941	0.079245	0.11188	0.0030116	0.39	22.5224556390977	0.37963	0.23902	1
1118	SP_019	Inward	NE	5.43	Patient	2.43	5.5	0.16237	0.23072	0.42446	2.11329	0.007815	0.064278	0.24048	0.0076028	0.315	18.7959819548872	0.43848	0.34568	0.5
1119	SP_019	OutWard	E	5.43	Patient	9.285	22.5	0.067216	0.33769	0.25542	11.386	0.030825	0.15098	0.11839	0.0023379	0.435	27.6331052631579	0.69433	0.11887	19
1120	SP_019	Inward	E	5.43	Patient	2.775	7.5	0.27715	0.39594	0.19995	8.23	0.014048	0.16262	0.16955	0.003575	0.3	19.5365656641604	0.6803	0.36685	1
